# Supplementary material for: Correlation of Pseudomonas aeruginosa Phage Resistance with the Numbers and Types of Antiphage Systems
Source: MDPI journal article supplement (doi:10.3390/ijms25031424), 2024-01-24
Supplement: s1 [file s1]

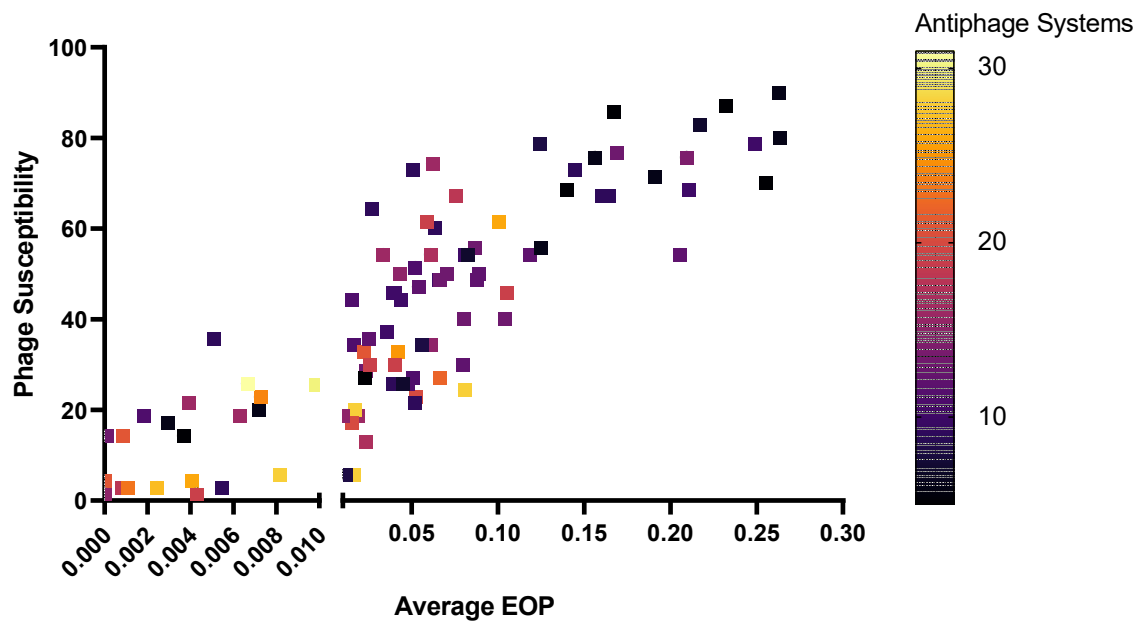

Figure S2. Multivariate analysis of 100 *P. aeruginosa* strains examining relationship between number of predicted antiphage systems with average efficiency of plating and overall phage susceptibility.
