# Supplementary material for: Correlation of Pseudomonas aeruginosa Phage Resistance with the Numbers and Types of Antiphage Systems
Source: MDPI journal article supplement (doi:10.3390/ijms25031424), 2024-01-24
Supplement: s1 [file s1]

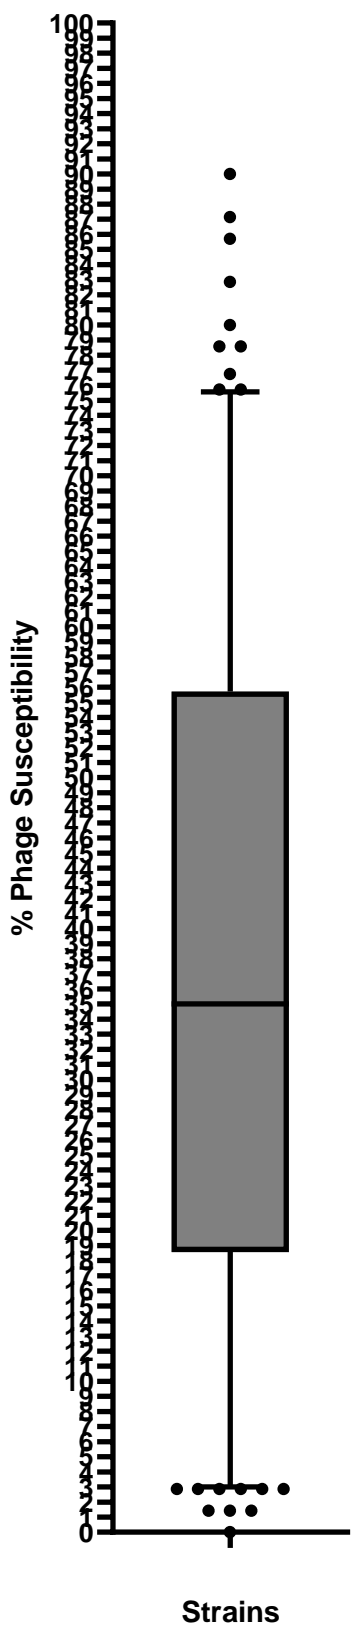

Figure S3. Box and whiskers plot of 100 strains of *P. aeruginosa* showing median phage susceptibility and the 10 most extreme strains. 10 strains lysed by 75.5% or greater of the phages constitute the most phage susceptible, 10 strains lysed by fewer than 3% of the phages constitute the most phage resistant. 40 strains lysing more than 3% but less than 35% constitute intermediate resistant strains. 40 strains lysed by greater than 35% but less than 75.5% of phages constitute intermediate susceptible strains.
