# Supplementary material for: Correlation of Pseudomonas aeruginosa Phage Resistance with the Numbers and Types of Antiphage Systems
Source: Int J Mol Sci. 2024 Jan 24;25(3):1424. doi: 10.3390/ijms25031424 (PMC10855318; doi:10.3390/ijms25031424)
Supplement: Supplementary file 1 [file ijms-25-01424-s001.zip]

Archive with 14 entries (14 files):
- Supplementary Figure S1 - Prophage Analysis.pdf
- Supplementary Figure S2 - Multivariate Analysis.pdf
- Supplementary Figure S3 - Box and Whiskers Plot.pdf
- Supplementary Table S1 - Strain Information.xlsx
- Supplementary Table S10 - Pycsar effector strains.xlsx
- Supplementary Table S11 - Shango Antiphage Systems.xlsx
- Supplementary Table S2 - Phage Information.xlsx
- Supplementary Table S3 - ST235 Isolate Susceptibility APS.xlsx
- Supplementary Table S4 - Serotype Analysis.xlsx
- Supplementary Table S5 - Prophage Analysis.xlsx
- Supplementary Table S6 - Antiphage Systems in Strains.xlsx
- Supplementary Table S7 - Phage Host Ranges.xlsx
- Supplementary Table S8 - Efficiency Of Plating.xlsx
- Supplementary Table S9 - Prevalence in Strains.xlsx
