# Supplementary material for: Correlation of Pseudomonas aeruginosa Phage Resistance with the Numbers and Types of Antiphage Systems
Source: Int J Mol Sci. 2024 Jan 24;25(3):1424. doi: 10.3390/ijms25031424 (PMC10855318; doi:10.3390/ijms25031424)
Supplement: Supplementary file 1 [file ijms-25-01424-s001.zip › Supplementary Table S1 - Strain Information.xlsx]

## Sheet: Table S1 - Strain Information
		Table S1. P. aeruginosa strains used in this work.
		Strain	Country	Year	Type	MLST
		315	USA	2010	RESPIRATORY	108
		317	USA	2010	WOUND	137
		321	USA	2010	WOUND	663
		552	USA	2010	URINE	1654
		994	USA	2010	RESPIRATORY	27
		1344	USA	2010	SURVEILLANCE	3003
		1356	USA	2010	SURVEILLANCE	3031
		1380	USA	2010	SURVEILLANCE	241
		1388	USA	2010	SURVEILLANCE	1105
		1583	USA	2010	RESPIRATORY	3005
		1601	USA	2010	WOUND	3032
		1612	USA	2010	EAR	207
		1613	USA	2010	SURVEILLANCE	2952
		1617	USA	2010	RESPIRATORY	390
		1688	USA	2010	URINE	699
		1739	USA	2010	BLOOD	463
		1899	USA	2010	SURVEILLANCE	1074
		1902	USA	2010	SURVEILLANCE	3008
		1906	USA	2010	SURVEILLANCE	244
		1925	USA	2010	RESPIRATORY	155
		1938	USA	2010	URINE	677
		1948	USA	2010	WOUND	845
		2042	USA	2010	RESPIRATORY	389
		2101	USA	2011	WOUND	827
		2108	USA	2011	TISSUE	3037
		2144	USA	2010	URINE	179
		2444	USA	2009	RESPIRATORY	654
		3705	Guam	2011	RESPIRATORY	2031
		4841	USA	2011	URINE	235
		5498	USA	2005	TISSUE	3014
		5508	USA	2005	FLUID	3002
		5519	USA	2004	WOUND	235
		5524	USA	2004	URINE	235
		5539	USA	2005	TISSUE	235
		6220	USA	2011	WOUND	244
		6241	USA	2011	WOUND	3043
		6678	USA	2012	TISSUE	235
		6695	USA	2012	URINE	497
		6739	USA	2011	URINE	3015
		7014	USA	2012	RESPIRATORY	1129
		8130	USA	2012	BLOOD	446
		8136	USA	2012	WOUND	381
		8139	USA	2012	WOUND	1503
		8141	USA	2012	RESPIRATORY	3043
		8912	USA	2007	URINE	532
		8914	USA	2007	BONE	1419
		8915	USA	2007	URINE	111
		9718	USA	2012	URINE	1601
		9873	USA	2012	URINE	3045
		11278	USA	2012	RESPIRATORY	829
		11281	USA	2012	WOUND	875
		11285	USA	2012	URINE	3030
		11286	USA	2012	WOUND	2387
		11536	USA	2012	WOUND	621
		11538	USA	2012	WOUND	1229
		11976	USA	2012	RESPIRATORY	111
		12282	USA	2012	RESPIRATORY	348
		12283	USA	2012	URINE	646
		12365	USA	2012	RESPIRATORY	253
		12368	USA	2012	BLOOD	1685
		12914	Afghanistan	2012	URINE	357
		13488	USA	2012	URINE	1414
		14981	USA	2013	RESPIRATORY	3004
		15566	USA	2013	URINE	2855
		15678	USA	2013	WOUND	235
		15753	USA	2013	RESPIRATORY	274
		16344	USA	2013	WOUND	3033
		16345	USA	2013	URINE	211
		16383	USA	2013	RESPIRATORY	3006
		16740	USA	2013	RESPIRATORY	633
		16744	USA	2013	TISSUE	309
		16847	USA	2013	SURVEILLANCE	253
		17849	USA	2013	RESPIRATORY	2065
		18560	USA	2013	WOUND	3007
		18562	USA	2013	RESPIRATORY	3034
		18754	USA	2013	TISSUE	166
		18803	USA	2013	RESPIRATORY	2132
		18855	USA	2013	TISSUE	3035
		18970	USA	2013	WOUND	192
		19711	USA	2013	RESPIRATORY	2865
		20176	Afghanistan	2013	SURVEILLANCE	316
		20190	USA	2013	RESPIRATORY	3036
		23861	USA	2014	RESPIRATORY	282
		25623	USA	2014	RESPIRATORY	3038
		25678	USA	2014	URINE	3039
		25762	USA	2014	RESPIRATORY	17
		26263	USA	2014	RESPIRATORY	3009
		29192	USA	2015	URINE	3010
		30858	USA	2015	RESPIRATORY	2142
		346179	USA	2015	RESPIRATORY	3011
		351791	USA	2015	URINE	252
		358800	USA	2015	RESPIRATORY	3040
		369569	USA	2015	BLOOD	3041
		373401	USA	2016	URINE	347
		390231	USA	2016	RESPIRATORY	2572
		401528	USA	2016	URINE	3042
		409937	USA	2016	FLUID	1337
		435288	USA	2016	RESPIRATORY	3012
		436311	USA	2016	URINE	3013
		443463	USA	2017	RESPIRATORY	2851
