# Supplementary material for: Correlation of Pseudomonas aeruginosa Phage Resistance with the Numbers and Types of Antiphage Systems
Source: Int J Mol Sci. 2024 Jan 24;25(3):1424. doi: 10.3390/ijms25031424 (PMC10855318; doi:10.3390/ijms25031424)
Supplement: Supplementary file 1 [file ijms-25-01424-s001.zip › Supplementary Table S2 - Phage Information.xlsx]

## Sheet: Sup Tab S2 - Phage Info
		Table S2. Phages used in this work.
		Phage	Type by Virion Structure	Family	Genus	Host Range	Isolation Strain	Year Isolated	Location Isolated
		EPa3	Myovirus	NA	Pbunavirus	50	PAO1	2016	United States
		Epa4	Podovirus	NA	Bruynoghevirus	21	PAO1	2016	United States
		EPa5	Siphovirus	Mesyanzhinovviridae	Epaquintavirus	50	PAO1	2016	United States
		EPa6	Myovirus	NA	Pbunavirus	28	PAO1	2016	United States
		EPa7	Myovirus	NA	Pbunavirus	37	PAO1	2016	United States
		EPa8	Myovirus	NA	Pbunavirus	49	PAO1	2016	United States
		EPa9	Myovirus	NA	Pbunavirus	39	PAO1	2016	United States
		EPa10	Myovirus	NA	Pbunavirus	40	PAO1	2016	United States
		EPa11	Myovirus	NA	Pbunavirus	53	PAO1	2016	United States
		EPa12	Myovirus	NA	Pbunavirus	48	MRSN 1680	2016	United States
		EPa13	Myovirus	NA	Pbunavirus	43	MRSN 1680	2016	United States
		EPa14	Myovirus	NA	Pbunavirus	45	MRSN 1680	2016	United States
		EPa15	Myovirus	NA	Pbunavirus	54	PAO1	2016	United States
		EPa16	Myovirus	NA	Nankokuvirus	23	MRSN 1680	2016	United States
		EPa17	Myovirus	NA	Nankokuvirus	23	MRSN 1409	2016	United States
		EPa18	Myovirus	NA	Nankokuvirus	30	MRSN 8130	2016	United States
		EPa19	Siphovirus	Mesyanzhinovviridae	Epaquintavirus	36	PAO1	2016	United States
		EPa20	Myovirus	NA	Pbunavirus	44	MRSN 1680	2016	United States
		EPa21	Myovirus	NA	Pbunavirus	41	MRSN 1680	2016	United States
		EPa22	Myovirus	NA	Pbunavirus	52	PAO1	2016	United States
		EPa23	Myovirus	NA	Pbunavirus	46	PAO1	2016	United States
		EPa24	Podovirus	NA	Bruynoghevirus	49	PAO1	2016	United States
		EPa25	Myovirus	NA	Pbunavirus	30	PAO1	2016	United States
		EPa26	Myovirus	NA	Pbunavirus	45	PAO1	2016	United States
		EPa33	Podovirus	NA	Hollowayvirus	28	PAO1	2016	United States
		EPa37	Myovirus	NA	Pbunavirus	46	PAO1	2016	United States
		EPa38	Siphovirus	Mesyanzhinovviridae	Yuavirus	7	PAO1	2017	United States
		EPa39	Myovirus	NA	Pbunavirus	46	PAO1	2017	United States
		EPa40	Podovirus	NA	Septimatrivirus	34	ATCC10145	2009	United States
		EPa41	Podovirus	NA	Septimatrivirus	12	ATCC10145	2009	United States
		EPa42	Myovirus	NA	Pbunavirus	18	ATCC10145	2009	United States
		EPa43	Siphovirus	Mesyanzhinovviridae	Epaquintavirus	37	PAO1	2017	United States
		EPa44	Siphovirus	Mesyanzhinovviridae	Epaquintavirus	17	PAO1	2017	United States
		EPa45	Podovirus	NA	Bruynoghevirus	37	PAO1	2017	United States
		EPa61	Myovirus	NA	Pbunavirus	48	PAO1	2017	United States
		EPa82	Podovirus	NA	Bruynoghevirus	19	Detroit-M	2019	United States
		EPa83	Podovirus	NA	Bruynoghevirus	19	Detroit-M	2019	United States
		EPa87	Podovirus	NA	Bruynoghevirus	16	Detroit-M	2019	United States
		EPa95	Podovirus	NA	Kochitakavirus	30	PAO1	2019	Mexico
		EPa99	Myovirus	NA	Pbunavirus	39	PAO1	2019	Mexico
		EPa100	Myovirus	NA	Pbunavirus	42	PAO1	2019	Mexico
		EPa104	Myovirus	NA	Pbunavirus	45	PAO1	2019	United States
		EPa112	Podovirus	Schitoviridae	Litunavirus	28	MRSN 9873	2019	United States
		EPa113	Myovirus	NA	Pbunavirus	29	MRSN 639312	2019	Mexico
		EPa114	Myovirus	NA	Pbunavirus	37	MRSN 639312	2019	Mexico
		EPa115	Myovirus	NA	Pbunavirus	36	MRSN 639312	2019	Mexico
		EPa116	Podovirus	NA	Septimatrevirus	38	MRSN 639320	2019	Mexico
		EPa118	Myovirus	NA	Pbunavirus	30	MRSN 639320	2019	Mexico
		EPa125	Podovirus	Autographiviridae	Phikmvvirus	38	PAO1	2019	Mexico
		EPp1	Podovirus	Autographiviridae	Warsawvirus	5	MRSN 18713	2022	United States
		AFR19	Podovirus	Autographiviridae	Phikmvvirus	45	ATCC10145	2020	Thailand
		AFR20	Podovirus	Autographiviridae	Phikmvvirus	46	ATCC10145	2020	Thailand
		AFR21	Podovirus	Autographiviridae	Phikmvvirus	46	ATCC10145	2020	Thailand
		AFR26	Podovirus	Autographiviridae	Phikmvvirus	54	MRSN 3705	2020	Thailand
		AFR28	Podovirus	Autographiviridae	Phikmvvirus	58	MRSN 4841	2020	Thailand
		AFR33	Podovirus	Autographiviridae	Pifdecavirus	13	MRSN 9718	2020	Thailand
		AFR40	Podovirus	Autographiviridae	Phikmvvirus	52	ATCC10145	2020	Thailand
		AFR41	Myovirus	NA	Pakpunavirus	51	PAO1	2020	Thailand
		AFR43	Podovirus	Autographiviridae	Phikmvvirus	44	MRSN 4841	2020	Thailand
		KEN3	Podovirus	NA	Bruynoghevirus	53	ATCC10145	2021	Kenya
		KEN5	Myovirus	NA	Pakpunavirus	63	MRSN 3705	2021	Kenya
		KEN6	Myovirus	NA	Pakpunavirus	59	MRSN 3705	2021	Kenya
		KEN7	Podovirus	Autographiviridae	Phikmvvirus	44	MRSN 4841	2021	Kenya
		KEN9	Myovirus	NA	Pakpunavirus	41	MRSN 4841	2021	Kenya
		KEN10	Podovirus	Autographiviridae	Phikmvvirus	45	MRSN 9718	2021	Kenya
		KEN19	Myovirus	NA	Phikzvirus	33	ATCC10145	2021	Kenya
		KEN30	Podovirus	Autographiviridae	Phikmvvirus	50	MRSN 4841	2021	Kenya
		KEN49	Myovirus	NA	Phikzvirus	32	MRSN 3705	2021	Kenya
		KEN50	Myovirus	NA	Pakpunavirus	56	MRSN 9718	2021	Kenya
		KEN51	Myovirus	NA	Phikzvirus	36	ATCC10145	2021	Kenya
