# Supplementary material for: Correlation of Pseudomonas aeruginosa Phage Resistance with the Numbers and Types of Antiphage Systems
Source: Int J Mol Sci. 2024 Jan 24;25(3):1424. doi: 10.3390/ijms25031424 (PMC10855318; doi:10.3390/ijms25031424)
Supplement: Supplementary file 1 [file ijms-25-01424-s001.zip › Supplementary Table S3 - ST235 Isolate Susceptibility APS.xlsx]

## Sheet: Table S3. ST Analysis
	Table S3. Phage susceptibility and number of identified antiphage systems encoded by ST235 strains
		ST235 Strains	Phage Susceptibility (%)	Number of Antiphage Systems
	1	MRSN4841	48.57	13
	2	MRSN5519	21.43	16
	3	MRSN5524	5.71	25
	4	MRSN5539	18.57	16
	5	MRSN6678	0	13
	6	MRSN15678	18.57	16
		AVERAGE	18.8083	16.5
		AVERAGE for all 100 strains	38.7	14.2
