# Supplementary material for: Correlation of Pseudomonas aeruginosa Phage Resistance with the Numbers and Types of Antiphage Systems
Source: Int J Mol Sci. 2024 Jan 24;25(3):1424. doi: 10.3390/ijms25031424 (PMC10855318; doi:10.3390/ijms25031424)
Supplement: Supplementary file 1 [file ijms-25-01424-s001.zip › Supplementary Table S4 - Serotype Analysis.xlsx]

## Sheet: Sheet1
		Table S4. Predicted serotypes of the diversity panel strains
		Strain	serogroup	% coverage of OSA	OSA Fragments	serotype	Susceptibility	# Antiphage Systems	Resistant Group
	1	994	1	99.67	1	1	28.57	13	IR		Serogroup	# Strains	Avg Susceptibility	Avg # Antiphage
	2	1612	1	99.35	1	1	54.29	10	IS		serogroup 1	11	35.7155	11.8182
	3	1613	1	99.67	1	1	71.43	6	IS		serogroup 2	3	22.8567	21.6667
	4	1948	1	99.67	1	1	54.29	16	IS		serogroup 3	5	62.572	10
	5	8139	1	99.35	1	1	35.71	12	IS		serogroup 4	10	38.7137	17.2
	6	13488	1	99.67	1	1	2.86	9	MR		serogroup 5	8	34.77	12
	7	25762	1	99.35	1	1	2.86	23	MR		serogroup 6	30	50.4763	11.6667
	8	351791	1	99.6	2	1	74.29	16	IS		serogroup 7	3	46.6633	9.33333
	9	390231	1	99.35	1	1	18.57	11	IR		serogroup 9	2	39.29	17.5
	10	435288	1	99.68	1	1	14.29	5	IR		serogroup 10	3	16.1933	15.6667
	11	436311	1	99.71	1	1	35.71	9	IS		serogroup 11	18	28.8883	16.3333
	12	1688	2	98.97	1	2	40	13	IS		serogroup 12	5	19.402	22.4
	13	1906	2	98.97	1	2	22.86	24	IR		serogroup 13	2	16.43	18
	14	8136	2	98.98	1	2	5.71	28	IR		Total	100
	15	2108	3	98.82	1	3	72.86	9	IS
	16	11538	3	99.7	1	3	75.71	14	MS
	17	15753	3	100	1	3	51.43	11	IS
	18	18560	3	99.7	1	3	68.57	5	IS
	19	18803	3	99.7	1	3	44.29	11	IS
	20	1739	4	100	1	4	32.86	25	IR
	21	2444	4	100	1	4	30	19	IR
	22	9873	4	100	1	4	4.29	26	IR
	23	11536	4	99.74	1	4	5.71	28	IR
	24	11976	4	100	1	4	61.43	26	IS
	25	15566	4	100	1	4	78.57	10	MS
	26	16344	4	100	1	4	45.71	10	IS
	27	18562	4	100	1	4	30	12	IR
	28	19711	4	100	1	4	72.8571	9	IS
	29	401528	4	99.61	1	4	25.71	7	IR
	30	1601	5	99.49	1	5	55.71	6	IS
	31	1902	5	99.23	1	5	27.14	5	IR
	32	2101	5	99.26	1	5	76.74	13	MS
	33	5498	5	98.97	1	5	22.86	20	IR
	34	5508	5	99.49	1	5	25.71	11	IR
	35	12282	5	100	2	5	30	19	IR
	36	12368	5	99.74	1	5	25.71	9	IR
	37	14981	5	99.49	1	5	14.29	13	IR
	38	315	6	98.85	1	6	60	9	IS
	39	321	6	99.62	1	6	85.71	5	MS
	40	1380	6	99.62	1	6	20	6	IR
	41	1583	6	99.62	1	6	48.57	10	IS
	42	1617	6	99.62	1	6	54.29	17	IS
	43	1899	6	99.62	1	6	67.14	18	IS
	44	1925	6	100	3	6	32.86	21	IR
	45	1938	6	99.62	1	6	34.29	15	IR
	46	2144	6	99.62	2	6	64.29	9	IS
	47	6695	6	99.62	1	6	54.29	12	IS
	48	6739	6	99.62	1	6	67.14	9	IS
	49	7014	6	99.64	2	6	34.29	8	IR
	50	11278	6	99.62	1	6	4.29	21	IR
	51	11281	6	99.62	1	6	80	6	MS
	52	11286	6	99.62	1	6	27.14	22	IR
	53	16345	6	99.62	1	6	90	6	MS
	54	16383	6	99.24	1	6	44.29	10	IS
	55	16740	6	99.62	1	6	45.71	19	IS
	56	17849	6	99.62	1	6	50	13	IS
	57	18754	6	99.62	1	6	82.86	7	MS
	58	18855	6	99.62	1	6	75.71	6	MS
	59	18970	6	99.62	1	6	87.14	5	MS
	60	20190	6	99.62	1	6	5.71	8	IR
	61	23861	6	99.62	1	6	50	15	IS
	62	29192	6	99.62	1	6	48.57	12	IS
	63	346179	6	99.62	1	6	70	5	IS
	64	358800	6	99.28	1	6	37.14	10	IS
	65	369569	6	99.62	1	6	21.43	9	IR
	66	373401	6	99.62	1	6	2.86	27	MR
	67	409937	6	99.62	1	6	68.57	10	IS
	68	317	7	99.39	1	7	17.14	6	IR
	69	11285	7	100	1	7	55.71	13	IS
	70	12283	7	100	1	7	67.14	9	IS
	71	3587	9	99.65	1	9	24.29	28	IR
	72	443463	9	100	1	9	54.29	7	IS
	73	1356	10	100	1	10	34.29	11	IR
	74	12365	10	100	2	10	1.43	19	MR
	75	16847	10	100	1	10	12.86	17	IR
	76	552	11	100	1	11	54.29	12	IS
	77	1344	11	100	1	11	78.57	8	MS
	78	4841	11	100	1	11	48.57	13	IS
	79	5519	11	100	1	11	21.43	16	IR
	80	5524	11	100	3	11	5.71	25	IR
	81	5539	11	100	1	11	18.57	16	IR
	82	6678	11	100	3	11	0	13	MR
	83	8130	11	100	1	11	45.71	10	IS
	84	8912	11	100	1	11	2.86	18	MR
	85	8914	11	99.57	1	11	2.86	26	MR
	86	9718	11	100	1	11	27.14	11	IR
	87	12914	11	100	2	11	25.71	31	IR
	88	15678	11	100	1	11	18.57	16	IR
	89	16744	11	100	1	11	61.43	19	IS
	90	20176	11	45.41	2	11	17.14	20	IR
	91	25623	11	100	1	11	40	13	IS
	92	26263	11	99.13	1	11	1.43	15	MR
	93	30858	11	100	1	11	50	12	IS
	94	3705	12	99.77	1	12	47.14	12	IS
	95	6220	12	100	1	12	1.43	12	MR
	96	6241	12	100	1	12	2.86	30	MR
	97	8141	12	100	1	12	25.58	30	IR
	98	8915	12	99.78	1	12	20	28	IR
	99	1388	13	99.68	1	13	14.29	21	IR
	100	25678	13	100	2	13	18.57	15	IR
