# Supplementary material for: Correlation of Pseudomonas aeruginosa Phage Resistance with the Numbers and Types of Antiphage Systems
Source: Int J Mol Sci. 2024 Jan 24;25(3):1424. doi: 10.3390/ijms25031424 (PMC10855318; doi:10.3390/ijms25031424)
Supplement: Supplementary file 1 [file ijms-25-01424-s001.zip › Supplementary Table S5 - Prophage Analysis.xlsx]

## Sheet: Prophage Regions in Strains
		PHASTER Prophage Predictions
	Strain	Intact	Questionable	Incomplete	Total	Susceptibility	Antiphage Systems
	315	2	3	2	7	60	9
	317	2	1	0	3	17.14	6
	321	1	2	1	4	85.71	5
	552	2	1	1	4	54.29	12
	994	2	2	3	7	28.57	13
	1344	0	3	1	4	78.57	8
	1356	3	0	1	4	34.29	11
	1380	3	1	3	7	20	6
	1388	4	2	3	9	14.29	21
	1583	1	0	2	3	48.57	10
	1601	1	2	2	5	55.71	6
	1612	2	0	0	2	54.29	10
	1613	1	0	1	2	71.43	6
	1617	2	1	4	7	54.29	17
	1688	3	0	2	5	40	13
	1739	2	2	2	6	32.86	25
	1899	4	1	0	5	67.14	18
	1902	2	2	1	5	27.14	5
	1906	3	2	4	9	22.86	24
	1925	1	1	4	6	32.86	21
	1938	2	1	5	8	34.29	15
	1948	1	1	1	3	54.29	16
	2101	1	0	2	3	76.74	13
	2108	1	0	2	3	72.86	9
	2144	4	3	4	11	64.29	9
	2444	3	2	5	10	30	19
	3587	2	1	0	3	24.29	28
	3705	3	1	3	7	47.14	12
	4841	0	1	0	1	48.57	13
	5498	6	0	3	9	22.86	20
	5508	1	2	2	5	25.71	11
	5519	1	1	1	3	21.43	16
	5524	2	2	6	10	5.71	25
	5539	3	1	3	7	18.57	16
	6220	3	2	3	8	1.43	12
	6241	1	3	1	5	2.86	30
	6678	2	1	2	5	0	13
	6695	1	0	1	2	54.29	12
	6739	0	2	1	3	67.14	9
	7014	0	2	1	3	34.29	8
	8130	2	3	1	6	45.71	10
	8136	4	0	4	8	5.71	28
	8139	2	0	2	4	35.71	12
	8141	2	2	1	5	25.58	30
	8912	3	2	3	8	2.86	18
	8914	3	3	5	11	2.86	26
	8915	3	1	0	4	20	28
	9718	4	1	0	5	27.14	11
	9873	2	1	1	4	4.29	26
	11278	1	2	2	5	4.29	21
	11281	1	1	0	2	80	6
	11285	2	1	1	4	55.71	13
	11286	2	1	6	9	27.14	22
	11536	3	1	3	7	5.71	28
	11538	2	1	4	7	75.71	14
	11976	1	1	3	5	61.43	26
	12282	4	1	3	8	30	19
	12283	0	1	0	1	67.14	9
	12365	1	2	6	9	1.43	19
	12368	2	0	1	3	25.71	9
	12914	2	1	1	4	25.71	31
	13488	0	0	2	2	2.86	9
	14981	2	2	0	4	14.29	13
	15566	1	2	1	4	78.57	10
	15678	2	2	2	6	18.57	16
	15753	2	0	1	3	51.43	11
	16344	0	4	0	4	45.71	10
	16345	2	1	2	5	90	6
	16383	2	1	1	4	44.29	10
	16740	2	1	0	3	45.71	19
	16744	2	4	1	7	61.43	19
	16847	4	1	5	10	12.86	17
	17849	4	1	0	5	50	13
	18560	1	1	1	3	68.57	5
	18562	1	1	2	4	30	12
	18754	1	0	1	2	82.86	7
	18803	2	1	1	4	44.29	11
	18855	1	2	0	3	75.71	6
	18970	1	1	1	3	87.14	5
	19711	1	1	1	3	72.8571	9
	20176	2	2	3	7	17.14	20
	20190	0	1	1	2	5.71	8
	23861	1	4	9	14	50	15
	25623	0	2	0	2	40	13
	25678	0	1	6	7	18.57	15
	25762	1	3	2	6	2.86	23
	26263	0	2	0	2	1.43	15
	29192	2	2	0	4	48.57	12
	30858	1	1	2	4	50	12
	346179	1	1	0	2	70	5
	351791	1	0	1	2	74.29	16
	358800	2	2	1	5	37.14	10
	369569	1	1	0	2	21.43	9
	373401	4	0	3	7	2.86	27
	390231	1	0	1	2	18.57	11
	401528	3	3	2	8	25.71	7
	409937	0	2	0	2	68.57	10
	435288	0	2	3	5	14.29	5
	436311	0	0	1	1	35.71	9
	443463	1	3	0	4	54.29	7
