# Supplementary material for: Correlation of Pseudomonas aeruginosa Phage Resistance with the Numbers and Types of Antiphage Systems
Source: Int J Mol Sci. 2024 Jan 24;25(3):1424. doi: 10.3390/ijms25031424 (PMC10855318; doi:10.3390/ijms25031424)
Supplement: Supplementary file 1 [file ijms-25-01424-s001.zip › Supplementary Table S6 - Antiphage Systems in Strains.xlsx]

## Sheet: Sup Tab S6 - Antiphage Systems
		Table S6. Antiphage systems and phage susceptibility of the 100 diverse P. aeruginosa strains.
		Strain	Antiphage System	Protein Name	Target Name	Description	Seqid	Start	End	Strand	Relative Position	# Antiphage Systems	Phage Susceptibility %
		MRSN315	PT_SspABCD	SspB	WP_087851485.1	DUF4007 family protein [Pseudomonas aeruginosa]	NZ_RXUI01000002.1	175753	176661	+	195	9	60
			PT_SspABCD	SspC	WP_126633542.1	hypothetical protein [Pseudomonas aeruginosa]	NZ_RXUI01000002.1	176654	180118	+	196
			PT_SspABCD	SspD	WP_087851390.1	phosphoadenosine phosphosulfate reductase family protein [Pseudomonas aeruginosa]	NZ_RXUI01000002.1	180096	180923	+	197
			cbass_type_III	TRIP13	WP_003050256.1	AAA family ATPase [Proteobacteria]	NZ_RXUI01000005.1	188757	189671	+	182
			cbass_type_III	HORMA	WP_003090160.1	hypothetical protein [Proteobacteria]	NZ_RXUI01000005.1	189668	190138	+	183
			cbass_type_III	HORMA	WP_116869565.1	HORMA domain containing protein [Pseudomonas aeruginosa]	NZ_RXUI01000005.1	190135	190635	+	184
			cbass_type_III	Cyclase	WP_003090158.1	nucleotidyltransferase domain-containing protein [Proteobacteria]	NZ_RXUI01000005.1	190635	191537	+	185
			cbass_type_III	Effector	WP_003050273.1	cbass effector endonuclease NucC [Proteobacteria]	NZ_RXUI01000005.1	191576	192301	+	186
			BstA	BstA	WP_031754521.1	hypothetical protein [Pseudomonas aeruginosa]	NZ_RXUI01000005.1	268451	269353	-	270
			CRISPR_array	CRISPR_array	CRISPR001	CRISPR001; repeat=GTTCACTGCCGTACAGGCAGCTAAGAAA; score=6.18	NZ_RXUI01000006.1	207835	208463	-	196.01
			CRISPR_array	CRISPR_array	CRISPR002	CRISPR002; repeat=GTTCACTGCCGTGTAGGCAGCTAAGAAA; score=6.26	NZ_RXUI01000018.1	255174	256582	+	199.01
			cas_type_I-F1	Cas1f	WP_003162915.1	type I-F CRISPR-associated endonuclease Cas1f [Pseudomonas aeruginosa]	NZ_RXUI01000018.1	256843	257817	+	200
			cas_type_I-F1	Cas23f	WP_034076074.1	type I-F CRISPR-associated helicase Cas3f [Pseudomonas aeruginosa]	NZ_RXUI01000018.1	257814	261044	+	201
			cas_type_I-F1	Cas8f	WP_004343803.1	type I-F CRISPR-associated protein Csy1 [Pseudomonas]	NZ_RXUI01000018.1	261102	262406	+	202
			cas_type_I-F1	Cas5f	WP_034076076.1	type I-F CRISPR-associated protein Csy2 [Pseudomonas aeruginosa]	NZ_RXUI01000018.1	262393	263376	+	203
			cas_type_I-F1	Cas7f	WP_023116494.1	type I-F CRISPR-associated protein Csy3 [Pseudomonas aeruginosa]	NZ_RXUI01000018.1	263387	264415	+	204
			cas_type_I-F1	Cas6f	WP_033942379.1	type I-F CRISPR-associated endoribonuclease Cas6/Csy4 [Pseudomonas aeruginosa]	NZ_RXUI01000018.1	264419	264982	+	205
			CRISPR_array	CRISPR_array	CRISPR003	CRISPR003; repeat=GTTCACTGCCGTATAGGCAGCTAAGAAA; score=6.17	NZ_RXUI01000018.1	265107	266214	-	205.02
			DMS_other	BrxHI	WP_044266087.1	DEAD/DEAH box helicase [Pseudomonas aeruginosa]	NZ_RXUI01000023.1	109922	112339	+	97
			DMS_other	mad3	WP_003097265.1	DNA replication/repair protein RecF [Pseudomonas]	NZ_RXUI01000023.1	116449	117558	-	101
			PD-T4-6	PD-T4-6	WP_003097784.1	serine/threonine protein kinase [Pseudomonas]	NZ_RXUI01000025.1	265025	266014	+	246
			RADAR	RdrB	WP_044060723.1	hypothetical protein [Pseudomonas aeruginosa]	NZ_RXUI01000029.1	289314	292004	-	279
			RADAR	RdrA	WP_058150714.1	hypothetical protein [Pseudomonas aeruginosa]	NZ_RXUI01000029.1	292006	294621	-	280
			SoFic	SoFic	WP_116869611.1	Fic family protein [Pseudomonas aeruginosa]	NZ_RXUI01000029.1	295739	296860	-	282
			PDC-M30	PDC-M30A	WP_003131866.1	three-Cys-motif partner protein TcmP [Pseudomonas]	NZ_RXUI01000030.1	336773	338089	-	319
			PDC-M30	PDC-M30B	WP_003111049.1	phage Gp37/Gp68 family protein [Pseudomonas]	NZ_RXUI01000030.1	338111	338854	-	320
		317	Lamassu_Family	LmuA	WP_079452820.1	hypothetical protein [Pseudomonas aeruginosa]	NZ_RXUH01000012.1	412	1626	+	1	6	17.14
			Lamassu_Family	LmuB	WP_046602341.1	DUF3732 domain-containing protein [Proteobacteria]	NZ_RXUH01000012.1	2072	3922	+	3
			PDC-S02	PDC-S02	WP_046602343.1	PDDEXK nuclease domain-containing protein [Pseudomonas aeruginosa]	NZ_RXUH01000012.1	4947	6113	-	5
			SoFic	SoFic	WP_003085005.1	Fic family protein [Pseudomonas]	NZ_RXUH01000019.1	77791	78912	+	80
			RM_type_IIG	REase_MTase_IIG	WP_003109152.1	DEAD/DEAH box helicase family protein [Pseudomonas aeruginosa]	NZ_RXUH01000026.1	845	5725	-	2
			DMS_other	mad3	WP_003097265.1	DNA replication/repair protein RecF [Pseudomonas]	NZ_RXUH01000026.1	8694	9803	-	4
			PD-T4-6	PD-T4-6	WP_003110436.1	serine/threonine protein kinase [Pseudomonas aeruginosa]	NZ_RXUH01000027.1	165776	166765	-	163
		321	RM_type_III	MTase_III	WP_046638824.1	site-specific DNA-methyltransferase [Pseudomonas aeruginosa]	NZ_RXUG01000002.1	489900	491807	+	477	5	85.71
			RM_type_III	REase_III	WP_046638805.1	DEAD/DEAH box helicase family protein [Pseudomonas aeruginosa]	NZ_RXUG01000002.1	491820	494837	+	478
			DRT_class_III	RT_UG5_small	WP_033997996.1	hypothetical protein [Pseudomonas aeruginosa]	NZ_RXUG01000003.1	280838	282808	+	259
			CRISPR_array	CRISPR_array	CRISPR001	CRISPR001; repeat=GTTCACTGCCGTGTAGGCAGCTAAGAAA; score=6.25	NZ_RXUG01000013.1	29913	31261	+	22.01
			cas_type_I-F1	Cas1f	WP_034004193.1	type I-F CRISPR-associated endonuclease Cas1f [Pseudomonas]	NZ_RXUG01000013.1	31522	32496	+	23
			cas_type_I-F1	Cas23f	WP_016263451.1	type I-F CRISPR-associated helicase Cas3f [Pseudomonas aeruginosa]	NZ_RXUG01000013.1	32493	35723	+	24
			cas_type_I-F1	Cas8f	WP_004343803.1	type I-F CRISPR-associated protein Csy1 [Pseudomonas]	NZ_RXUG01000013.1	35781	37085	+	25
			cas_type_I-F1	Cas5f	WP_034004190.1	type I-F CRISPR-associated protein Csy2 [Pseudomonas aeruginosa]	NZ_RXUG01000013.1	37072	38055	+	26
			cas_type_I-F1	Cas7f	WP_003116909.1	type I-F CRISPR-associated protein Csy3 [Pseudomonas aeruginosa]	NZ_RXUG01000013.1	38066	39094	+	27
			cas_type_I-F1	Cas6f	WP_023087476.1	type I-F CRISPR-associated endoribonuclease Cas6/Csy4 [Pseudomonas]	NZ_RXUG01000013.1	39098	39661	+	28
			CRISPR_array	CRISPR_array	CRISPR002	CRISPR002; repeat=GTTCACTGCCGTATAGGCAGCTAAGAAA; score=6.16	NZ_RXUG01000013.1	39786	40653	-	28.02
			PD-T4-6	PD-T4-6	WP_003097784.1	serine/threonine protein kinase [Pseudomonas]	NZ_RXUG01000015.1	263074	264063	+	247
			SoFic	SoFic	WP_003113218.1	Fic family protein [Pseudomonas]	NZ_RXUG01000016.1	329432	330553	-	316
		552	DMS_other	SngC	WP_126566334.1	DEAD/DEAH box helicase [Pseudomonas aeruginosa]	NZ_RXTP01000003.1	5171	8074	+	7	12	54.29
			PDC-S58	PDC-S58	WP_126566335.1	hypothetical protein [Pseudomonas aeruginosa]	NZ_RXTP01000003.1	8126	9517	-	8
			DMS_other	Control_protein	WP_052156177.1	helix-turn-helix domain-containing protein [Pseudomonas aeruginosa]	NZ_RXTP01000003.1	9681	9926	-	9
			HEC-07	HEC-07	WP_126566417.1	hypothetical protein [Pseudomonas aeruginosa]	NZ_RXTP01000005.1	453223	454839	+	433
			CRISPR_array	CRISPR_array	CRISPR001	CRISPR001; repeat=GTTCACTGCCGTATAGGCAGCTAAGAAA; score=6.23	NZ_RXTP01000009.1	491948	492395	+	456.01
			DMS_other	SspD	WP_126566494.1	hypothetical protein [Pseudomonas aeruginosa]	NZ_RXTP01000011.1	181874	182659	-	167
			DMS_other	MTase_II	WP_033987711.1	DNA adenine methylase [Pseudomonas aeruginosa]	NZ_RXTP01000011.1	182656	183513	-	168
			PD-T4-6	PD-T4-6	WP_023109781.1	protein kinase [Pseudomonas aeruginosa]	NZ_RXTP01000013.1	213719	215356	+	202
			PD-T4-7	PD-T4-7	WP_124142167.1	hypothetical protein [Pseudomonas aeruginosa]	NZ_RXTP01000017.1	7040	7897	-	11
			PD-T4-6	PD-T4-6	WP_003097784.1	serine/threonine protein kinase [Pseudomonas]	NZ_RXTP01000020.1	20392	21381	+	17
			PDC-M28	PDC-M28A	WP_078451045.1	SAM-dependent methyltransferase [Pseudomonas aeruginosa]	NZ_RXTP01000021.1	190966	191382	+	175
			PDC-M28	PDC-M28B	WP_126566720.1	AAA family ATPase [Pseudomonas aeruginosa]	NZ_RXTP01000021.1	191379	192728	+	176
			PDC-M28	PDC-M28C	WP_023125299.1	hypothetical protein [Pseudomonas aeruginosa]	NZ_RXTP01000021.1	192725	194119	+	177
			PD-Lambda-5	PD-Lambda-5_B	WP_071536658.1	DNA adenine methylase [Pseudomonas aeruginosa]	NZ_RXTP01000022.1	18670	19530	+	24
			PD-Lambda-5	PD-Lambda-5_A	WP_023129333.1	hypothetical protein [Pseudomonas aeruginosa]	NZ_RXTP01000022.1	19531	20778	-	25
			PD-Lambda-5	PD-Lambda-5_B	WP_073663507.1	DNA adenine methylase [Pseudomonas aeruginosa]	NZ_RXTP01000025.1	122213	123073	-	124
			PD-Lambda-5	PD-Lambda-5_A	WP_126566735.1	hypothetical protein [Pseudomonas aeruginosa]	NZ_RXTP01000025.1	123146	124471	-	125
			DMS_other	MTase_II	WP_126566739.1	DNA cytosine methyltransferase [Pseudomonas aeruginosa]	NZ_RXTP01000025.1	130441	132351	+	135
			DMS_other	DndC	WP_073663502.1	phosphoadenosine phosphosulfate reductase family protein [Pseudomonas aeruginosa]	NZ_RXTP01000025.1	132348	133580	+	136
			SoFic	SoFic	WP_126566798.1	Fic family protein [Pseudomonas aeruginosa]	NZ_RXTP01000030.1	78062	79183	+	79
		994	RM_type_IIG	REase_MTase_IIG	WP_023121022.1	class I SAM-dependent DNA methyltransferase [Pseudomonas]	NZ_RXSX01000002.1	287293	290076	+	272	13	28.57
			PDC-S06	PDC-S06	WP_023114634.1	AAA family ATPase [Pseudomonas]	NZ_RXSX01000002.1	293437	296031	+	275
			PDC-M30	PDC-M30B	WP_003111049.1	phage Gp37/Gp68 family protein [Pseudomonas]	NZ_RXSX01000005.1	231051	231794	+	209
			PDC-M30	PDC-M30A	WP_003111048.1	three-Cys-motif partner protein TcmP [Pseudomonas]	NZ_RXSX01000005.1	231816	233132	+	210
			cbass_type_III	TRIP13	WP_023114497.1	AAA family ATPase [Pseudomonas]	NZ_RXSX01000006.1	284307	285221	+	289
			cbass_type_III	HORMA	WP_023114496.1	hypothetical protein [Pseudomonas]	NZ_RXSX01000006.1	285218	285688	+	290
			cbass_type_III	HORMA	WP_003090159.1	hypothetical protein [Proteobacteria]	NZ_RXSX01000006.1	285685	286185	+	291
			cbass_type_III	Cyclase	WP_003090158.1	nucleotidyltransferase domain-containing protein [Proteobacteria]	NZ_RXSX01000006.1	286185	287087	+	292
			cbass_type_III	Effector	WP_003050273.1	cbass effector endonuclease NucC [Proteobacteria]	NZ_RXSX01000006.1	287126	287851	+	293
			PDC-S06	PDC-S06	WP_003160977.1	AAA family ATPase [Pseudomonas]	NZ_RXSX01000011.1	14061	16340	+	13
			druantia_type_III	DruE3	WP_003160970.1	DEAD/DEAH box helicase [Pseudomonas]	NZ_RXSX01000011.1	25567	31782	-	20
			druantia_type_III	DruH3	WP_206425296.1	STY4851/ECs_5259 family protein [Pseudomonas]	NZ_RXSX01000011.1	31788	35117	-	21
			RM_type_I	REase_I	WP_031654465.1	DEAD/DEAH box helicase family protein [Pseudomonas]	NZ_RXSX01000011.1	47939	51322	+	34
			RM_type_I	MTase_I	WP_003160959.1	type I restriction-modification system subunit M [Pseudomonas]	NZ_RXSX01000011.1	51355	52938	+	35
			RM_type_I	Specificity_I	WP_003160958.1	restriction endonuclease subunit S [Pseudomonas]	NZ_RXSX01000011.1	52935	54044	+	36
			SoFic	SoFic	WP_003113218.1	Fic family protein [Pseudomonas]	NZ_RXSX01000012.1	235200	236321	-	230
			PD-T4-6	PD-T4-6	WP_003097784.1	serine/threonine protein kinase [Pseudomonas]	NZ_RXSX01000013.1	179684	180673	+	166
			RosmerTA	RmrT	WP_023114934.1	hypothetical protein [Pseudomonas]	NZ_RXSX01000015.1	288904	289566	+	242
			RosmerTA	RmrA	WP_023114935.1	XRE family transcriptional regulator [Pseudomonas]	NZ_RXSX01000015.1	289585	290787	+	243
			PDC-S02	PDC-S02	WP_023121030.1	PDDEXK nuclease domain-containing protein [Pseudomonas]	NZ_RXSX01000016.1	161695	162759	-	153
			Tiamat	TmtA	WP_031654392.1	DUF3883 domain-containing protein [Pseudomonas aeruginosa]	NZ_RXSX01000031.1	10808	15607	-	11
			DMS_other	MTase_I	WP_021204877.1	N-6 DNA methylase [Pseudomonas]	NZ_RXSX01000031.1	17150	19273	+	14
			DMS_other	Specificity_I	WP_023110681.1	hypothetical protein [Pseudomonas]	NZ_RXSX01000031.1	19273	20793	+	15
		1344	RM_type_II	MTase_II	WP_023105228.1	DNA cytosine methyltransferase [Pseudomonas aeruginosa]	NZ_RXWG01000002.1	26444	27658	+	41	8	78.57
			RM_type_II	REase_II	WP_023105229.1	Eco29kI family restriction endonuclease [Pseudomonas aeruginosa]	NZ_RXWG01000002.1	27655	28305	+	42
			wadjet_type_I	JetA1	WP_071573405.1	DUF3375 domain-containing protein [Pseudomonas aeruginosa]	NZ_RXWG01000008.1	161870	163369	+	149
			wadjet_type_I	JetB1	WP_015647862.1	DUF4194 domain-containing protein [Pseudomonas]	NZ_RXWG01000008.1	163372	164121	+	150
			wadjet_type_I	JetC1	WP_126558714.1	hypothetical protein [Pseudomonas aeruginosa]	NZ_RXWG01000008.1	164118	167423	+	151
			wadjet_type_I	JetD1	WP_010792099.1	DUF2220 family protein [Pseudomonas]	NZ_RXWG01000008.1	167407	168588	+	152
			argonaute_solo	PprPIWI	pseudo_subWP_003159611.1	RNaseH domain-containing protein [Pseudomonas aeruginosa]	NZ_RXWG01000008.1	168828	169202	-	153
			PD-T4-6	PD-T4-6	WP_003097784.1	serine/threonine protein kinase [Pseudomonas]	NZ_RXWG01000059.1	20393	21382	+	17
			RM_type_I	REase_I	WP_126559024.1	DEAD/DEAH box helicase family protein [Pseudomonas aeruginosa]	NZ_RXWG01000104.1	5473	8655	-	11
			PDC-S14	PDC-S14	WP_126559025.1	GIY-YIG nuclease family protein [Pseudomonas aeruginosa]	NZ_RXWG01000104.1	9160	10116	-	13
			RM_type_I	Specificity_I	WP_126559026.1	restriction endonuclease subunit S [Pseudomonas aeruginosa]	NZ_RXWG01000104.1	10113	11417	-	14
			RM_type_I	MTase_I	WP_126559027.1	type I restriction-modification system subunit M [Pseudomonas aeruginosa]	NZ_RXWG01000104.1	11414	13333	-	15
			SoFic	SoFic	pseudo_subNP_249265.1	hypothetical protein PA0574 [Pseudomonas aeruginosa PAO1]	NZ_RXWG01000104.1	15701	16803	+	19
			dsr1	dsr1	WP_126559030.1	SIR2 family protein [Pseudomonas aeruginosa]	NZ_RXWG01000104.1	17858	21643	+	21
			CRISPR_array	CRISPR_array	CRISPR001	CRISPR001; repeat=GTTCACTGCCGTATAGGCAGCTAAGAAA; score=6.25	NZ_RXWG01000135.1	386	1013	-	0.01
		1356	HEC-01	HEC-01B	WP_071536491.1	DUF4276 family protein [Pseudomonas aeruginosa]	NZ_RXWE01000011.1	41018	41680	-	40	11	34.29
			HEC-01	HEC-01A	WP_071536492.1	AAA family ATPase [Pseudomonas aeruginosa]	NZ_RXWE01000011.1	41684	43075	-	41
			olokun	OloB	WP_034038398.1	hypothetical protein [Pseudomonas aeruginosa]	NZ_RXWE01000040.1	30394	32094	-	25
			olokun	OloA	WP_126622481.1	hypothetical protein [Pseudomonas aeruginosa]	NZ_RXWE01000040.1	32091	33704	-	26
			PD-T4-6	PD-T4-6	WP_126622651.1	serine/threonine protein kinase [Pseudomonas aeruginosa]	NZ_RXWE01000055.1	20394	21383	+	17
			SoFic	SoFic	WP_126622882.1	Fic family protein [Pseudomonas aeruginosa]	NZ_RXWE01000113.1	23934	25055	-	29
			RM_type_I	REase_I	WP_034021869.1	type I restriction endonuclease subunit R [Pseudomonas aeruginosa]	NZ_RXWE01000129.1	1568	4702	-	1
			PrrC	PrrC	WP_126622981.1	AAA family ATPase [Pseudomonas aeruginosa]	NZ_RXWE01000129.1	5380	6564	-	3
			RM_type_I	Specificity_I	WP_221768246.1	restriction endonuclease subunit S [Pseudomonas aeruginosa]	NZ_RXWE01000129.1	6566	7597	-	4
			RM_type_I	MTase_I	WP_034021874.1	type I restriction-modification system subunit M [Pseudomonas aeruginosa]	NZ_RXWE01000129.1	7795	9354	-	5
			argonaute_type_III	PprPIWI	WP_003124229.1	RNaseH domain-containing protein [Pseudomonas aeruginosa]	NZ_RXWE01000130.1	4655	7006	-	7
			argonaute_type_III	PprDinG	WP_124133208.1	hypothetical protein [Pseudomonas aeruginosa]	NZ_RXWE01000130.1	7003	10077	-	8
			argonaute_type_III	PprRE	WP_024928871.1	hypothetical protein [Pseudomonas]	NZ_RXWE01000130.1	10061	11101	-	9
			RM_type_I	REase_I	WP_126622993.1	DEAD/DEAH box helicase family protein [Pseudomonas aeruginosa]	NZ_RXWE01000130.1	23701	27081	+	23
			RM_type_I	MTase_I	WP_126622986.1	type I restriction-modification system subunit M [Pseudomonas aeruginosa]	NZ_RXWE01000130.1	29252	30835	+	25
			RM_type_I	Specificity_I	WP_126622987.1	restriction endonuclease subunit S [Pseudomonas aeruginosa]	NZ_RXWE01000130.1	30835	31992	+	26
			DMS_other	mad3	WP_126622988.1	AAA family ATPase [Pseudomonas aeruginosa]	NZ_RXWE01000130.1	32007	33833	+	27
			PDC-S24	PDC-S24	WP_126622991.1	Fic family protein [Pseudomonas aeruginosa]	NZ_RXWE01000130.1	47479	49008	-	36
			CRISPR_array	CRISPR_array	CRISPR001	CRISPR001; repeat=GTTCACTGCCGTGTAGGCAGCTAAGAAA; score=6.26	NZ_RXWE01000141.1	227	1695	+	1.01
			cas_type_I-F1	Cas1f	WP_023103134.1	type I-F CRISPR-associated endonuclease Cas1f [Pseudomonas]	NZ_RXWE01000141.1	1956	2930	+	2
			cas_type_I-F1	Cas23f	WP_126623048.1	type I-F CRISPR-associated helicase Cas3f [Pseudomonas aeruginosa]	NZ_RXWE01000141.1	2927	6157	+	3
			cas_type_I-F1	Cas8f	WP_126623049.1	type I-F CRISPR-associated protein Csy1 [Pseudomonas aeruginosa]	NZ_RXWE01000141.1	6215	7519	+	4
			cas_type_I-F1	Cas5f	WP_043095101.1	type I-F CRISPR-associated protein Csy2 [Pseudomonas aeruginosa]	NZ_RXWE01000141.1	7506	8489	+	5
			cas_type_I-F1	Cas7f	WP_043095103.1	type I-F CRISPR-associated protein Csy3 [Pseudomonas aeruginosa]	NZ_RXWE01000141.1	8500	9528	+	6
			cas_type_I-F1	Cas6f	WP_126623050.1	type I-F CRISPR-associated endoribonuclease Cas6/Csy4 [Pseudomonas aeruginosa]	NZ_RXWE01000141.1	9532	10095	+	7
			CRISPR_array	CRISPR_array	CRISPR002	CRISPR002; repeat=GTTCACTGCCGTATAGGCAGCTAAGAAA; score=6.03	NZ_RXWE01000141.1	10219	10605	-	7.02
			CRISPR_array	CRISPR_array	CRISPR003	CRISPR003; repeat=GTTCACTGCCGTATAGGCAGCTAAGAAA; score=6.06	NZ_RXWE01000174.1	228	495	+	1.01
		1380	CRISPR_array	CRISPR_array	CRISPR001	CRISPR001; repeat=GTTCACTGCCGTATAGGCAGCTAAGAAA; score=6.25	NZ_RXWD01000002.1	176515	177683	-	159.01	6	20
			PDC-S06	PDC-S06	WP_034009080.1	AAA family ATPase [Pseudomonas aeruginosa]	NZ_RXWD01000005.1	59098	61467	+	49
			PDC-S39	PDC-S39	WP_003112392.1	hypothetical protein [Pseudomonas]	NZ_RXWD01000009.1	88509	90338	+	88
			helicase-DUF2290	DUF2290	WP_003112393.1	DUF2290 domain-containing protein [Pseudomonas]	NZ_RXWD01000009.1	90841	91542	-	89
			helicase-DUF2290	Helicase	WP_023122205.1	DEAD/DEAH box helicase [Pseudomonas aeruginosa]	NZ_RXWD01000009.1	91535	93670	-	90
			PD-T4-6	PD-T4-6	WP_003097784.1	serine/threonine protein kinase [Pseudomonas]	NZ_RXWD01000010.1	84380	85369	+	78
			SoFic	SoFic	WP_023121888.1	Fic family protein [Pseudomonas aeruginosa]	NZ_RXWD01000011.1	328533	329654	-	316
			CRISPR_array	CRISPR_array	CRISPR002	CRISPR002; repeat=GTTCACTGCCGTATAGGCAGCTAAGAAA; score=6.16	NZ_RXWD01000029.1	37374	38362	+	24.01
			cas_type_I-F1	Cas6f	WP_009876500.1	type I-F CRISPR-associated endoribonuclease Cas6/Csy4 [Pseudomonas aeruginosa]	NZ_RXWD01000029.1	38486	39049	-	25
			cas_type_I-F1	Cas7f	WP_003143949.1	type I-F CRISPR-associated protein Csy3 [Pseudomonas]	NZ_RXWD01000029.1	39053	40081	-	26
			cas_type_I-F1	Cas5f	WP_009876498.1	type I-F CRISPR-associated protein Csy2 [Pseudomonas aeruginosa]	NZ_RXWD01000029.1	40092	41075	-	27
			cas_type_I-F1	Cas8f	WP_009876497.1	type I-F CRISPR-associated protein Csy1 [Pseudomonas aeruginosa]	NZ_RXWD01000029.1	41062	42366	-	28
			cas_type_I-F1	Cas23f	WP_126435207.1	type I-F CRISPR-associated helicase Cas3f [Pseudomonas aeruginosa]	NZ_RXWD01000029.1	42424	45654	-	29
			cas_type_I-F1	Cas1f	WP_004349917.1	type I-F CRISPR-associated endonuclease Cas1f [Pseudomonas]	NZ_RXWD01000029.1	45651	46625	-	30
			CRISPR_array	CRISPR_array	CRISPR003	CRISPR003; repeat=GTTCACTGCCGTGTAGGCAGCTAAGAAA; score=6.26	NZ_RXWD01000029.1	46886	47693	-	30.02
		1388	RM_type_III	REase_III	WP_052156402.1	DEAD/DEAH box helicase family protein [Pseudomonas aeruginosa]	NZ_RXWC01000004.1	35107	38160	-	46	21	14.29
			RM_type_III	MTase_III	WP_043496655.1	site-specific DNA-methyltransferase [Pseudomonas aeruginosa]	NZ_RXWC01000004.1	38171	40063	-	47
			ietAS	IetS	WP_052156401.1	S8 family peptidase [Gammaproteobacteria]	NZ_RXWC01000004.1	40890	43112	-	49
			ietAS	IetA	WP_043496600.1	AAA family ATPase [Gammaproteobacteria]	NZ_RXWC01000004.1	43240	44226	-	50
			AbiE	AbiEi	WP_161773252.1	type IV toxin-antitoxin system AbiEi family antitoxin domain-containing protein [Pseudomonas aeruginosa]	NZ_RXWC01000004.1	69854	70612	+	78
			AbiE	AbiEii	WP_126624636.1	nucleotidyl transferase AbiEii/AbiGii toxin family protein [Pseudomonas aeruginosa]	NZ_RXWC01000004.1	70605	71525	+	79
			SoFic	SoFic	WP_003113218.1	Fic family protein [Pseudomonas]	NZ_RXWC01000006.1	330504	331625	-	317
			PD-T4-6	PD-T4-6	WP_003097784.1	serine/threonine protein kinase [Pseudomonas]	NZ_RXWC01000007.1	178655	179644	+	164
			Pycsar_effector	PycTIR	WP_010562503.1	nucleotide-binding protein [Pseudomonas]	NZ_RXWC01000009.1	147029	147955	+	134
			Pycsar_effector	PycC	WP_003127475.1	transcriptional regulator [Pseudomonas]	NZ_RXWC01000009.1	148036	149580	+	135
			ietAS	IetA	WP_033982317.1	AAA family ATPase [Pseudomonas aeruginosa]	NZ_RXWC01000010.1	22576	23559	+	21
			ietAS	IetS	WP_057386862.1	S8 family peptidase [Pseudomonas aeruginosa]	NZ_RXWC01000010.1	23748	26075	+	22
			Ppl	Ppl	WP_023131321.1	hypothetical protein [Pseudomonas aeruginosa]	NZ_RXWC01000016.1	220512	223358	-	209
			DMS_other	DrmD	pseudo_subWP_011544395.1	IS21-like element ISUnCu3 family helper ATPase IstB [Pseudomonas sp. WS 5011]	NZ_RXWC01000020.1	11565	11921	+	11
			hma	hmaC	WP_033982644.1	DUF499 domain-containing protein [Pseudomonas aeruginosa]	NZ_RXWC01000020.1	12796	15624	-	14
			HEC-02	HEC-02A	WP_033982651.1	hypothetical protein [Pseudomonas aeruginosa]	NZ_RXWC01000020.1	15632	16144	-	15
			HEC-02	HEC-02B	WP_033982643.1	AAA family ATPase [Pseudomonas aeruginosa]	NZ_RXWC01000020.1	16157	17194	-	16
			hma	hmaB	WP_033982642.1	DUF1156 domain-containing protein [Pseudomonas aeruginosa]	NZ_RXWC01000020.1	17207	20101	-	17
			HEC-08	HEC-08	WP_033982638.1	hypothetical protein [Pseudomonas aeruginosa]	NZ_RXWC01000020.1	20102	21157	-	18
			hma	hmaA	WP_033982637.1	DUF3883 domain-containing protein [Pseudomonas aeruginosa]	NZ_RXWC01000020.1	21315	24839	-	19
			DMS_other	WYL	WP_033982633.1	WYL domain-containing protein [Pseudomonas aeruginosa]	NZ_RXWC01000020.1	25758	26633	+	21
			Mokosh_TypeI	MkoB	WP_048512748.1	phospholipase D-like domain-containing protein [Pseudomonas aeruginosa]	NZ_RXWC01000024.1	176528	178366	-	150
			Mokosh_TypeI	MkoA	WP_033990969.1	DUF2075 domain-containing protein [Pseudomonas aeruginosa]	NZ_RXWC01000024.1	178409	182044	-	151
			PDC-S02	PDC-S02	WP_087786571.1	PDDEXK nuclease domain-containing protein [Gammaproteobacteria]	NZ_RXWC01000025.1	121626	122792	+	119
			gabija	GajB	WP_087786566.1	UvrD-helicase domain-containing protein [Gammaproteobacteria]	NZ_RXWC01000025.1	130878	132611	-	124
			gabija	GajA	WP_087786565.1	ATP-dependent endonuclease [Gammaproteobacteria]	NZ_RXWC01000025.1	132608	134689	-	125
			RM_type_I	REase_I	WP_126624711.1	DEAD/DEAH box helicase family protein [Pseudomonas aeruginosa]	NZ_RXWC01000035.1	8145	11324	-	9
			RM_type_I	Specificity_I	WP_126624712.1	restriction endonuclease subunit S [Pseudomonas aeruginosa]	NZ_RXWC01000035.1	11389	12714	-	10
			RM_type_I	MTase_I	WP_108720410.1	type I restriction-modification system subunit M [Pseudomonas aeruginosa]	NZ_RXWC01000035.1	12711	14630	-	11
			PDC-M30	PDC-M30B	WP_003111049.1	phage Gp37/Gp68 family protein [Pseudomonas]	NZ_RXWC01000046.1	34708	35451	+	34
			PDC-M30	PDC-M30A	WP_003111048.1	three-Cys-motif partner protein TcmP [Pseudomonas]	NZ_RXWC01000046.1	35473	36789	+	35
			Azaca	ZacC	WP_073653120.1	DEAD/DEAH box helicase [Pseudomonas aeruginosa]	NZ_RXWC01000049.1	4045	7176	-	2
			Azaca	ZacB	WP_033982562.1	phospholipase D family protein [Pseudomonas aeruginosa]	NZ_RXWC01000049.1	7166	9025	-	3
			Azaca	ZacA	WP_079867428.1	DUF6361 family protein [Pseudomonas aeruginosa]	NZ_RXWC01000049.1	9015	10193	-	4
			PDC-S06	PDC-S06	pseudo_subWP_003288360.1	AAA family ATPase [Pseudomonas]	NZ_RXWC01000050.1	13133	15412	+	11
			gabija	GajB	WP_020750449.1	UvrD-helicase domain-containing protein [Pseudomonas aeruginosa]	NZ_RXWC01000061.1	4206	5273	-	4
			gabija	GajA	WP_003100901.1	AAA family ATPase [Pseudomonas aeruginosa]	NZ_RXWC01000061.1	5266	6870	-	5
			Mokosh_TypeI	MkoB	WP_009681706.1	hypothetical protein [Pseudomonas]	NZ_RXWC01000062.1	5828	7384	-	5
			Mokosh_TypeI	MkoA	WP_009681705.1	NERD domain-containing protein [Pseudomonas]	NZ_RXWC01000062.1	7377	12335	-	6
		1583	VSPR	Vsr	WP_017002481.1	very short patch repair endonuclease [Pseudomonas aeruginosa]	NZ_RXVX01000019.1	2813	3238	-	5	10	48.57
			DMS_other	mREase_II	WP_017002482.1	restriction endonuclease [Pseudomonas aeruginosa]	NZ_RXVX01000019.1	3242	4432	-	6
			VSPR	MTase_II	WP_017002483.1	DNA cytosine methyltransferase [Pseudomonas aeruginosa]	NZ_RXVX01000019.1	4518	5501	+	7
			PD-T4-6	PD-T4-6	WP_096250148.1	serine/threonine protein kinase [Pseudomonas aeruginosa]	NZ_RXVX01000036.1	127785	128774	+	118
			DMS_other	Specificity_I	WP_017001535.1	restriction endonuclease subunit S [Pseudomonas aeruginosa]	NZ_RXVX01000038.1	77717	78298	+	77
			DMS_other	MTase_I	WP_017001536.1	N-6 DNA methylase [Pseudomonas]	NZ_RXVX01000038.1	78291	79766	+	78
			AbiD	AbiD	WP_017001537.1	Abi family protein [Pseudomonas]	NZ_RXVX01000038.1	80032	81021	+	79
			SoFic	SoFic	WP_003113218.1	Fic family protein [Pseudomonas]	NZ_RXVX01000038.1	81489	82610	+	80
			druantia_other	DruA	WP_015502749.1	DUF4338 domain-containing protein [Pseudomonas aeruginosa]	NZ_RXVX01000043.1	931	2160	+	1
			druantia_other	DruC	WP_031685688.1	hypothetical protein [Pseudomonas aeruginosa]	NZ_RXVX01000043.1	3846	5723	+	2
			druantia_other	DruE	WP_058158874.1	DUF1998 domain-containing protein [Pseudomonas aeruginosa]	NZ_RXVX01000043.1	6795	12329	+	3
			shedu	SduA	WP_033943991.1	DUF4263 domain-containing protein [Pseudomonas aeruginosa]	NZ_RXVX01000046.1	92071	93525	+	76
			CRISPR_array	CRISPR_array	CRISPR001	CRISPR001; repeat=CGCGCCCCGCACGGGCGCGTGGATTGAAAC; score=9.16	NZ_RXVX01000057.1	28518	29405	-	33.01
			cas_type_I-C	Cas2c	WP_023103410.1	CRISPR-associated endonuclease Cas2 [Pseudomonas aeruginosa]	NZ_RXVX01000057.1	29589	29879	-	34
			cas_type_I-C	Cas1c	pseudo_subWP_012701705.1	type I-C CRISPR-associated endonuclease Cas1c [Azotobacter vinelandii]	NZ_RXVX01000057.1	29889	30928	-	35
			cas_type_I-C	Cas4c	WP_023103412.1	CRISPR-associated protein Cas4 [Pseudomonas aeruginosa]	NZ_RXVX01000057.1	30932	31564	-	36
			cas_type_I-C	Cas7c	WP_023103413.1	type I-C CRISPR-associated protein Cas7/Csd2 [Pseudomonas aeruginosa]	NZ_RXVX01000057.1	31583	32452	-	37
			cas_type_I-C	Cas8c	WP_023103414.1	type I-C CRISPR-associated protein Cas8c/Csd1 [Pseudomonas aeruginosa]	NZ_RXVX01000057.1	32464	34227	-	38
			cas_type_I-C	Cas5c	WP_023103415.1	type I-C CRISPR-associated protein Cas5c [Pseudomonas aeruginosa]	NZ_RXVX01000057.1	34224	34898	-	39
			cas_type_I-C	Cas3c	WP_023103416.1	CRISPR-associated helicase/endonuclease Cas3 [Pseudomonas aeruginosa]	NZ_RXVX01000057.1	34949	37183	-	40
			HEC-04	HEC-04	WP_126633099.1	AAA family ATPase [Pseudomonas aeruginosa]	NZ_RXVX01000084.1	29877	31355	+	35
		1601	SoFic	SoFic	WP_023130540.1	Fic family protein [Pseudomonas aeruginosa]	NZ_RXVW01000029.1	56591	57712	-	67	6	55.71
			DRT_class_II	Drt2	WP_016851804.1	reverse transcriptase/maturase family protein [Pseudomonas]	NZ_RXVW01000040.1	85223	86512	-	84
			PD-T4-6	PD-T4-6	WP_003097784.1	serine/threonine protein kinase [Pseudomonas]	NZ_RXVW01000059.1	20502	21491	+	18
			AbiD	AbiD	WP_034055631.1	Abi family protein [Pseudomonas aeruginosa]	NZ_RXVW01000089.1	105514	106512	-	96
			cbass_type_II	Effector	WP_108202062.1	hypothetical protein [Pseudomonas aeruginosa]	NZ_RXVW01000116.1	33872	34537	+	48
			cbass_type_II	Cyclase	WP_108202061.1	hypothetical protein [Pseudomonas aeruginosa]	NZ_RXVW01000116.1	34791	35972	+	49
			cbass_type_II	E1-E2	WP_108202060.1	ThiF family adenylyltransferase [Pseudomonas aeruginosa]	NZ_RXVW01000116.1	35979	37595	+	50
			cbass_type_II	JAB	WP_071533988.1	Mov34/MPN/PAD-1 family protein [Pseudomonas aeruginosa]	NZ_RXVW01000116.1	37583	38053	+	51
			ietAS	IetA	WP_124121384.1	AAA family ATPase [Pseudomonas aeruginosa]	NZ_RXVW01000129.1	44647	45738	+	48
			ietAS	IetS	WP_126558511.1	S8 family peptidase [Pseudomonas aeruginosa]	NZ_RXVW01000129.1	45754	47982	+	49
		1612	septu_type_I	PtuB1	WP_073656884.1	hypothetical protein [Pseudomonas aeruginosa]	NZ_RXVV01000002.1	7824	8660	-	7	10	54.29
			PDC-M01	PDC-M01B	WP_073656884.1	hypothetical protein [Pseudomonas aeruginosa]	NZ_RXVV01000002.1	7824	8660	-	7
			septu_type_I	PtuA1	WP_058013160.1	AAA family ATPase [Pseudomonas aeruginosa]	NZ_RXVV01000002.1	8657	10192	-	8
			PDC-M01	PDC-M01A	WP_058013160.1	AAA family ATPase [Pseudomonas aeruginosa]	NZ_RXVV01000002.1	8657	10192	-	8
			brex_type_II	BrxHI	WP_058013163.1	DEAD/DEAH box helicase [Pseudomonas aeruginosa]	NZ_RXVV01000002.1	11697	13808	-	11
			brex_type_II	BrxD	WP_025242137.1	BREX system ATP-binding protein BrxD [Pseudomonas]	NZ_RXVV01000002.1	13833	15152	-	12
			brex_type_II	PglZ	WP_073656885.1	BREX-2 system phosphatase PglZ [Pseudomonas aeruginosa]	NZ_RXVV01000002.1	15168	17957	-	13
			brex_type_II	BrxC	WP_058013165.1	hypothetical protein [Pseudomonas aeruginosa]	NZ_RXVV01000002.1	17962	21639	-	14
			brex_type_II	PglX	WP_103119323.1	BREX-2 system adenine-specific DNA-methyltransferase PglX [Pseudomonas aeruginosa]	NZ_RXVV01000002.1	21656	25348	-	15
			brex_type_II	PglW	WP_062842558.1	BREX system serine/threonine kinase PglW [Pseudomonas aeruginosa]	NZ_RXVV01000002.1	25392	29573	-	16
			DRT_class_I	Drt4	WP_033995686.1	RNA-directed DNA polymerase [Pseudomonas aeruginosa]	NZ_RXVV01000004.1	644683	645984	+	602
			Lamassu_Family	LmuA	WP_033995693.1	hypothetical protein [Pseudomonas aeruginosa]	NZ_RXVV01000004.1	649571	650635	+	605
			Lamassu_Family	LmuC	WP_124182268.1	hypothetical protein [Pseudomonas aeruginosa]	NZ_RXVV01000004.1	650620	651072	+	606
			Lamassu_Family	LmuB	WP_052150779.1	AAA family ATPase [Pseudomonas aeruginosa]	NZ_RXVV01000004.1	651069	652931	+	607
			DMS_other	BrxHI	WP_049311444.1	DEAD/DEAH box helicase [Pseudomonas]	NZ_RXVV01000007.1	6039	8456	+	6
			DMS_other	DrmC	WP_034067313.1	transposase, partial [Pseudomonas aeruginosa]	NZ_RXVV01000007.1	8567	8752	+	7
			qatABCD	QatA	WP_033873463.1	KAP family P-loop domain protein [Pseudomonas aeruginosa]	NZ_RXVV01000024.1	116619	118574	+	111
			qatABCD	QatB	WP_031300120.1	hypothetical protein [Pseudomonas aeruginosa]	NZ_RXVV01000024.1	118574	119419	+	112
			qatABCD	QatC	WP_003450777.1	7-cyano-7-deazaguanine synthase [Pseudomonas aeruginosa]	NZ_RXVV01000024.1	119416	120681	+	113
			qatABCD	QatD	WP_003450774.1	TatD family hydrolase [Pseudomonas aeruginosa]	NZ_RXVV01000024.1	120681	121430	+	114
			Lamassu_Family	LmuA	WP_023091908.1	hypothetical protein [Pseudomonas]	NZ_RXVV01000024.1	449153	450586	+	406
			Lamassu_Family	LmuC	WP_023091909.1	hypothetical protein [Pseudomonas]	NZ_RXVV01000024.1	450586	451299	+	407
			Lamassu_Family	LmuB	WP_023091910.1	AAA family ATPase [Pseudomonas]	NZ_RXVV01000024.1	451296	453674	+	408
			PD-T4-6	PD-T4-6	WP_003140077.1	serine/threonine protein kinase [Pseudomonas]	NZ_RXVV01000025.1	178674	179663	+	162
			3HP	Hp3	WP_124186705.1	hypothetical protein [Pseudomonas aeruginosa]	NZ_RXVV01000031.1	62392	63063	-	65
			3HP	Hp2	WP_126569368.1	hypothetical protein [Pseudomonas aeruginosa]	NZ_RXVV01000031.1	63065	64189	-	66
			3HP	Hp1	WP_073657158.1	hypothetical protein [Pseudomonas aeruginosa]	NZ_RXVV01000031.1	64182	65159	-	67
			PDC-S31	PDC-S31	WP_073657286.1	DUF2971 domain-containing protein [Pseudomonas aeruginosa]	NZ_RXVV01000042.1	17942	18895	-	23
		1613	PD-T4-6	PD-T4-6	WP_003097784.1	serine/threonine protein kinase [Pseudomonas]	NZ_RXVU01000001.1	247038	248027	-	234	6	71.43
			brex_type_I	BrxA	WP_126632345.1	DUF1819 family protein [Pseudomonas aeruginosa]	NZ_RXVU01000003.1	688695	689483	+	665
			brex_type_I	BrxB	WP_073674909.1	DUF1788 domain-containing protein [Pseudomonas aeruginosa]	NZ_RXVU01000003.1	689464	690039	+	666
			brex_type_I	BrxC	WP_126632346.1	BREX system P-loop protein BrxC [Pseudomonas aeruginosa]	NZ_RXVU01000003.1	690067	693708	+	667
			brex_type_I	PglX	WP_034038619.1	SAM-dependent methyltransferase [Pseudomonas aeruginosa]	NZ_RXVU01000003.1	696442	698331	+	669
			brex_type_I	PglX	WP_185830396.1	type II restriction endonuclease subunit M [Pseudomonas aeruginosa]	NZ_RXVU01000003.1	698331	700280	+	670
			HEC-06	HEC-06	WP_034038621.1	DUF262 domain-containing HNH endonuclease family protein [Pseudomonas aeruginosa]	NZ_RXVU01000003.1	700277	702085	+	671
			brex_type_I	PglZ	WP_034038622.1	PglZ domain-containing protein [Pseudomonas aeruginosa]	NZ_RXVU01000003.1	702082	704610	+	672
			brex_type_I	BrxL	WP_126632347.1	BREX system Lon protease-like protein BrxL [Pseudomonas aeruginosa]	NZ_RXVU01000003.1	704616	706736	+	673
			CRISPR_array	CRISPR_array	CRISPR001	CRISPR001; repeat=GTTCACTGCCGTATAGGCAGCTAAGAAA; score=6.26	NZ_RXVU01000006.1	146367	146874	+	135.01
			Lamassu_Family	LmuA	WP_058180346.1	hypothetical protein [Pseudomonas aeruginosa]	NZ_RXVU01000006.1	148114	149181	+	137
			Lamassu_Family	LmuC	WP_058180347.1	hypothetical protein [Pseudomonas aeruginosa]	NZ_RXVU01000006.1	149182	149616	+	138
			Lamassu_Family	LmuB	WP_061195560.1	hypothetical protein [Pseudomonas aeruginosa]	NZ_RXVU01000006.1	149616	151433	+	139
			RADAR	RdrB	WP_126632497.1	hypothetical protein [Pseudomonas aeruginosa]	NZ_RXVU01000008.1	555050	557740	-	529
			RADAR	RdrA	WP_126632498.1	hypothetical protein [Pseudomonas aeruginosa]	NZ_RXVU01000008.1	557742	560357	-	530
			SoFic	SoFic	WP_003113218.1	Fic family protein [Pseudomonas]	NZ_RXVU01000008.1	561476	562597	-	532
		1617	DMS_other	WYL	WP_031631072.1	WYL domain-containing protein [Pseudomonas aeruginosa]	NZ_RXVT01000004.1	19364	20275	+	24	17	54.29
			DMS_other	BrxF	WP_031631070.1	BREX-3 system P-loop-containing protein BrxF [Pseudomonas aeruginosa]	NZ_RXVT01000004.1	20283	20750	+	25
			DMS_other	BrxC	WP_031631068.1	DUF6079 family protein [Pseudomonas aeruginosa]	NZ_RXVT01000004.1	20762	24487	+	26
			DMS_other	mad3	WP_031631066.1	ATP-binding protein [Pseudomonas aeruginosa]	NZ_RXVT01000004.1	24491	25768	+	27
			PDC-M07	PDC-M07A	WP_031631066.1	ATP-binding protein [Pseudomonas aeruginosa]	NZ_RXVT01000004.1	24491	25768	+	27
			PDC-M07	PDC-M07B	WP_071543152.1	hypothetical protein [Pseudomonas aeruginosa]	NZ_RXVT01000004.1	25765	26292	+	28
			DMS_other	PglX	WP_031631059.1	DNA methylase [Pseudomonas aeruginosa]	NZ_RXVT01000004.1	30352	33126	+	31
			DMS_other	BrxHI	WP_031631056.1	DEAD/DEAH box helicase family protein [Pseudomonas aeruginosa]	NZ_RXVT01000004.1	33335	36172	+	32
			DMS_other	PglZ	WP_049885610.1	BREX-3 system phosphatase PglZ [Pseudomonas aeruginosa]	NZ_RXVT01000004.1	36169	38199	+	33
			DMS_other	BrxA	WP_031631051.1	hypothetical protein [Pseudomonas aeruginosa]	NZ_RXVT01000004.1	38196	38927	+	34
			GAO_19	SIR2	WP_023083791.1	SIR2 family protein [Pseudomonas aeruginosa]	NZ_RXVT01000022.1	29454	30467	+	34
			GAO_19	HerA	WP_023083790.1	ATP-binding protein [Pseudomonas aeruginosa]	NZ_RXVT01000022.1	30478	32205	+	35
			PDC-M30	PDC-M30A	WP_004352835.1	three-Cys-motif partner protein TcmP [Pseudomonas]	NZ_RXVT01000022.1	86185	87438	-	95
			PDC-M30	PDC-M30B	WP_004352836.1	phage Gp37/Gp68 family protein [Pseudomonas]	NZ_RXVT01000022.1	87471	88253	-	96
			PDC-M38	PDC-M38B	WP_071543138.1	hypothetical protein [Pseudomonas aeruginosa]	NZ_RXVT01000024.1	136070	136702	-	127
			PDC-M38	PDC-M38A	WP_071543139.1	ATP-binding protein [Pseudomonas aeruginosa]	NZ_RXVT01000024.1	136706	137797	-	128
			PD-T4-6	PD-T4-6	WP_031629820.1	serine/threonine protein kinase [Pseudomonas aeruginosa]	NZ_RXVT01000043.1	190048	191037	+	173
			qatABCD	QatD	WP_196647341.1	TatD family hydrolase [Pseudomonas aeruginosa]	NZ_RXVT01000052.1	199557	200282	-	193
			qatABCD	QatC	WP_201011857.1	hypothetical protein [Pseudomonas aeruginosa]	NZ_RXVT01000052.1	200279	201232	-	194
			qatABCD	QatB	WP_024928364.1	hypothetical protein [Pseudomonas aeruginosa]	NZ_RXVT01000052.1	201580	202332	-	195
			qatABCD	QatA	WP_071543162.1	KAP family P-loop domain protein [Pseudomonas aeruginosa]	NZ_RXVT01000052.1	202332	204116	-	196
			SoFic	SoFic	WP_031631777.1	Fic family protein [Pseudomonas aeruginosa]	NZ_RXVT01000052.1	205168	206289	-	198
			cbass_type_III	Effector	WP_003050273.1	cbass effector endonuclease NucC [Proteobacteria]	NZ_RXVT01000079.1	99197	99922	-	97
			cbass_type_III	Cyclase	WP_003090158.1	nucleotidyltransferase domain-containing protein [Proteobacteria]	NZ_RXVT01000079.1	99961	100863	-	98
			cbass_type_III	HORMA	WP_003090159.1	hypothetical protein [Proteobacteria]	NZ_RXVT01000079.1	100863	101363	-	99
			cbass_type_III	HORMA	WP_003090160.1	hypothetical protein [Proteobacteria]	NZ_RXVT01000079.1	101360	101830	-	100
			cbass_type_III	TRIP13	WP_016852809.1	AAA family ATPase [Proteobacteria]	NZ_RXVT01000079.1	101827	102741	-	101
			PDC-S02	PDC-S02	WP_020750775.1	PDDEXK nuclease domain-containing protein [Proteobacteria]	NZ_RXVT01000090.1	9189	10253	-	11
			PDC-S06	PDC-S06	WP_031630288.1	AAA family ATPase [Pseudomonas aeruginosa]	NZ_RXVT01000097.1	920	3328	+	2
			retron_II-A	RT_II-A	WP_071543143.1	retron St85 family RNA-directed DNA polymerase [Pseudomonas aeruginosa]	NZ_RXVT01000098.1	53860	54813	-	50
			retron_II-A	NDT_II-A	WP_124716006.1	retron St85 family effector protein [Pseudomonas aeruginosa]	NZ_RXVT01000098.1	54810	55757	-	51
			retron_II-A	msr-msd	NA	msr-msd identified by match to covariance model: TypeIA_IIAI	NZ_RXVT01000098.1	55769	55936	-	51.011
			PDC-S06	PDC-S06	WP_019484542.1	AAA family ATPase [Gammaproteobacteria]	NZ_RXVT01000099.1	57467	60094	-	59
			mza	mzaE	WP_023101508.1	AIPR family protein [Proteobacteria]	NZ_RXVT01000099.1	60204	62276	-	60
			mza	mzaD	WP_019484544.1	PD-(D/E)XK motif protein [Proteobacteria]	NZ_RXVT01000099.1	62276	63241	-	61
			mza	mzaC	WP_019484545.1	endonuclease [Proteobacteria]	NZ_RXVT01000099.1	63234	65894	-	62
			mza	mzaB	WP_019484546.1	ATP-binding protein [Proteobacteria]	NZ_RXVT01000099.1	65891	67369	-	63
			VSPR	Vsr	WP_009397211.1	very short patch repair endonuclease [Proteobacteria]	NZ_RXVT01000099.1	67505	67963	+	64
			VSPR	MTase_II	WP_031632012.1	DNA cytosine methyltransferase [Pseudomonas aeruginosa]	NZ_RXVT01000099.1	67960	69579	-	65
			AbiE	AbiEi	WP_017462895.1	type IV toxin-antitoxin system AbiEi family antitoxin domain-containing protein [Proteobacteria]	NZ_RXVT01000099.1	90000	90758	+	88
			AbiE	AbiEii	WP_019486756.1	nucleotidyl transferase AbiEii/AbiGii toxin family protein [Proteobacteria]	NZ_RXVT01000099.1	90751	91671	+	89
			hachiman_type_I	HamA1	WP_049885638.1	DUF1837 domain-containing protein [Pseudomonas aeruginosa]	NZ_RXVT01000109.1	1002	1844	+	4
			hachiman_type_I	HamB1	WP_124716009.1	hypothetical protein [Pseudomonas aeruginosa]	NZ_RXVT01000109.1	1841	3991	+	5
		1688	PDC-S27	PDC-S27	WP_196720991.1	ATP-binding protein [Pseudomonas aeruginosa]	NZ_RXVM01000002.1	287105	288568	+	301	13	40
			RosmerTA	RmrT	WP_071536843.1	hypothetical protein [Pseudomonas aeruginosa]	NZ_RXVM01000002.1	298472	299140	+	313
			RosmerTA	RmrA	WP_061363361.1	XRE family transcriptional regulator [Pseudomonas]	NZ_RXVM01000002.1	299137	300243	+	314
			DMS_other	WYL	WP_023115262.1	WYL domain-containing protein [Pseudomonas]	NZ_RXVM01000002.1	306085	306960	-	318
			DMS_other	mad1	WP_031684503.1	helix-turn-helix domain-containing protein [Pseudomonas]	NZ_RXVM01000002.1	310514	310717	+	322
			brex_type_I	BrxA	WP_031684504.1	DUF1819 family protein [Pseudomonas aeruginosa]	NZ_RXVM01000002.1	310710	311321	+	323
			brex_type_I	BrxB	WP_198082239.1	DUF1788 domain-containing protein [Pseudomonas aeruginosa]	NZ_RXVM01000002.1	311345	311974	+	324
			brex_type_I	BrxC	WP_031684509.1	BREX system P-loop protein BrxC [Pseudomonas aeruginosa]	NZ_RXVM01000002.1	311986	315540	+	325
			brex_type_I	PglX	WP_031684510.1	BREX-1 system adenine-specific DNA-methyltransferase PglX [Pseudomonas aeruginosa]	NZ_RXVM01000002.1	315620	317425	+	326
			shedu	SduA	WP_031684511.1	DUF4263 domain-containing protein [Pseudomonas aeruginosa]	NZ_RXVM01000002.1	317595	318839	+	328
			brex_type_I	PglX	WP_196721051.1	BREX-1 system adenine-specific DNA-methyltransferase PglX [Pseudomonas aeruginosa]	NZ_RXVM01000002.1	319042	320748	+	330
			brex_type_I	PglZ	WP_031684514.1	BREX-1 system phosphatase PglZ type A [Pseudomonas aeruginosa]	NZ_RXVM01000002.1	320756	323263	+	331
			brex_type_I	BrxL	WP_031684515.1	BREX system Lon protease-like protein BrxL [Pseudomonas aeruginosa]	NZ_RXVM01000002.1	323276	325372	+	332
			RM_type_I	MTase_I	WP_003114406.1	type I restriction-modification system subunit M [Pseudomonas aeruginosa]	NZ_RXVM01000002.1	327931	330309	+	335
			RM_type_I	Specificity_I	WP_010895634.1	restriction endonuclease subunit S [Pseudomonas aeruginosa]	NZ_RXVM01000002.1	330387	331682	+	336
			PDC-S05	PDC-S05	pseudo_subWP_019727088.1	virulence RhuM family protein [Gammaproteobacteria]	NZ_RXVM01000002.1	331707	332727	+	337
			RM_type_I	REase_I	WP_003114402.1	type I restriction endonuclease subunit R [Pseudomonas aeruginosa]	NZ_RXVM01000002.1	332724	336164	+	338
			PDC-S06	PDC-S06	WP_121383064.1	AAA family ATPase [Pseudomonas aeruginosa]	NZ_RXVM01000003.1	573408	576023	+	505
			cbass_type_II	Effector	WP_121383087.1	SAVED domain-containing protein [Pseudomonas aeruginosa]	NZ_RXVM01000003.1	576381	577556	+	506
			cbass_type_II	Cyclase	WP_121383066.1	nucleotidyltransferase [Pseudomonas aeruginosa]	NZ_RXVM01000003.1	577556	578806	+	507
			cbass_type_II	E1-E2	WP_121383068.1	ThiF family adenylyltransferase [Pseudomonas aeruginosa]	NZ_RXVM01000003.1	578790	580559	+	508
			cbass_type_II	JAB	WP_121383070.1	Mov34/MPN/PAD-1 family protein [Pseudomonas aeruginosa]	NZ_RXVM01000003.1	580575	581066	+	509
			cbass_type_II	Effector	WP_121383072.1	3'-5' exonuclease [Pseudomonas aeruginosa]	NZ_RXVM01000003.1	581063	581611	-	510
			Mokosh_TypeI	MkoB	WP_071538268.1	hypothetical protein [Pseudomonas aeruginosa]	NZ_RXVM01000004.1	41478	42905	-	34
			Mokosh_TypeI	MkoA	WP_031684703.1	NERD domain-containing protein [Pseudomonas aeruginosa]	NZ_RXVM01000004.1	42905	47947	-	35
			shango	SngC	WP_126547945.1	DEAD/DEAH box helicase [Pseudomonas aeruginosa]	NZ_RXVM01000005.1	307759	309969	-	282
			shango	SngB	WP_126547946.1	ATP-binding protein [Pseudomonas aeruginosa]	NZ_RXVM01000005.1	309944	311239	-	283
			shango	SngA	WP_126547947.1	TerB N-terminal domain-containing protein [Pseudomonas aeruginosa]	NZ_RXVM01000005.1	311236	313716	-	284
			PD-T4-6	PD-T4-6	WP_003114615.1	serine/threonine protein kinase [Pseudomonas]	NZ_RXVM01000011.1	123447	124436	-	127
			shango	SngC	WP_020750859.1	DEAD/DEAH box helicase [Pseudomonas aeruginosa]	NZ_RXVM01000030.1	5277	7499	-	4
			shango	SngB	WP_003111436.1	ATP-binding protein [Pseudomonas aeruginosa]	NZ_RXVM01000030.1	7474	8769	-	5
			shango	SngA	WP_023099096.1	TerB N-terminal domain-containing protein [Pseudomonas aeruginosa]	NZ_RXVM01000030.1	8766	11633	-	6
		1739	PD-T4-6	PD-T4-6	WP_023119617.1	serine/threonine protein kinase [Pseudomonas]	NZ_RXVL01000003.1	130256	131245	-	141	25	32.86
			shedu	SduA	WP_020750495.1	DUF4263 domain-containing protein [Pseudomonas]	NZ_RXVL01000003.1	309124	310104	+	303
			Pycsar_effector	PycTIR	WP_010562503.1	nucleotide-binding protein [Pseudomonas]	NZ_RXVL01000008.1	204956	205882	+	190
			Pycsar_effector	PycC	WP_058199413.1	transcriptional regulator [Pseudomonas aeruginosa]	NZ_RXVL01000008.1	205963	207507	+	191
			PDC-M30	PDC-M30B	WP_003111049.1	phage Gp37/Gp68 family protein [Pseudomonas]	NZ_RXVL01000025.1	3805	4548	+	6
			PDC-M30	PDC-M30A	WP_116808998.1	three-Cys-motif partner protein TcmP [Pseudomonas aeruginosa]	NZ_RXVL01000025.1	4548	5885	+	7
			wadjet_type_I	JetA1	WP_071534647.1	DUF3375 domain-containing protein [Pseudomonas]	NZ_RXVL01000036.1	161049	162548	+	147
			wadjet_type_I	JetB1	WP_172042070.1	DUF4194 domain-containing protein [Pseudomonas aeruginosa]	NZ_RXVL01000036.1	162551	163300	+	148
			wadjet_type_I	JetC1	WP_071557664.1	hypothetical protein [Pseudomonas aeruginosa]	NZ_RXVL01000036.1	163297	166602	+	149
			wadjet_type_I	JetD1	WP_010792099.1	DUF2220 family protein [Pseudomonas]	NZ_RXVL01000036.1	166586	167767	+	150
			argonaute_other	PprPIWI	WP_071557663.1	RNaseH domain-containing protein [Pseudomonas aeruginosa]	NZ_RXVL01000036.1	168008	170359	-	151
			argonaute_other	PprDinG	pseudo_subWP_003119446.1	hypothetical protein, partial [Pseudomonas aeruginosa]	NZ_RXVL01000036.1	170356	171553	-	152
			SoFic	SoFic	WP_003113218.1	Fic family protein [Pseudomonas]	NZ_RXVL01000037.1	77803	78924	+	79
			PDC-S46	PDC-S46	WP_023116011.1	hypothetical protein [Pseudomonas]	NZ_RXVL01000037.1	83796	85961	+	82
			PDC-M06	PDC-M06B	WP_003118321.1	hypothetical protein [Pseudomonas]	NZ_RXVL01000043.1	62456	62980	-	62
			PDC-M06	PDC-M06A	WP_012019489.1	hypothetical protein [Pseudomonas]	NZ_RXVL01000043.1	62985	63260	-	63
			DMS_other	WYL	WP_031755504.1	WYL domain-containing protein [Pseudomonas aeruginosa]	NZ_RXVL01000045.1	3316	4191	-	5
			DMS_other	MTase_I	WP_031755509.1	type I restriction-modification system subunit M [Pseudomonas aeruginosa]	NZ_RXVL01000045.1	5224	7158	+	7
			DMS_other	Specificity_I	pseudo_subWP_003145707.1	restriction endonuclease subunit S [Pseudomonas aeruginosa]	NZ_RXVL01000045.1	7580	8548	+	8
			zorya_type_I	ZorA1	WP_031755516.1	anti-phage defense ZorAB system protein ZorA [Pseudomonas aeruginosa]	NZ_RXVL01000045.1	12486	14681	+	11
			zorya_type_I	ZorB1	WP_031755518.1	OmpA family protein [Pseudomonas aeruginosa]	NZ_RXVL01000045.1	14693	15430	+	12
			zorya_type_I	ZorC1	WP_031755520.1	hypothetical protein [Pseudomonas aeruginosa]	NZ_RXVL01000045.1	15431	17107	+	13
			zorya_type_I	ZorD1	WP_031755522.1	DEAD/DEAH box helicase [Pseudomonas aeruginosa]	NZ_RXVL01000045.1	17107	20355	+	14
			HEC-03	HEC-03A	WP_071533900.1	hypothetical protein [Pseudomonas]	NZ_RXVL01000055.1	3582	4112	-	5
			HEC-03	HEC-03B	WP_020750756.1	DUF3696 domain-containing protein [Pseudomonas]	NZ_RXVL01000055.1	4109	5506	-	6
			AbiE	AbiEii	WP_003108486.1	nucleotidyl transferase AbiEii/AbiGii toxin family protein [Pseudomonas]	NZ_RXVL01000055.1	66821	67756	-	65
			AbiE	AbiEi	WP_020750746.1	type IV toxin-antitoxin system AbiEi family antitoxin domain-containing protein [Pseudomonas]	NZ_RXVL01000055.1	67740	68561	-	66
			DMS_other	REase_I	WP_031756783.1	DEAD/DEAH box helicase family protein [Pseudomonas]	NZ_RXVL01000070.1	1715	4753	+	3
			DMS_other	mad3	WP_003097265.1	DNA replication/repair protein RecF [Pseudomonas]	NZ_RXVL01000070.1	7351	8460	-	5
			RM_type_I	REase_I	WP_031756408.1	DEAD/DEAH box helicase family protein [Pseudomonas aeruginosa]	NZ_RXVL01000071.1	15503	18883	+	15
			RM_type_I	MTase_I	WP_003158585.1	type I restriction-modification system subunit M [Pseudomonas]	NZ_RXVL01000071.1	21054	22637	+	17
			RM_type_I	Specificity_I	WP_071557667.1	restriction endonuclease subunit S [Pseudomonas aeruginosa]	NZ_RXVL01000071.1	22646	23842	+	18
			DMS_other	mad3	WP_003158583.1	AAA family ATPase [Pseudomonas]	NZ_RXVL01000071.1	23857	25686	+	19
			druantia_type_III	DruH3	WP_034003998.1	STY4851/ECs_5259 family protein [Pseudomonas aeruginosa]	NZ_RXVL01000071.1	26091	29426	+	21
			druantia_type_III	DruE3	WP_148107238.1	DEAD/DEAH box helicase, partial [Pseudomonas aeruginosa]	NZ_RXVL01000071.1	29419	32236	+	22
			DMS_other	WYL	WP_012077903.1	WYL domain-containing protein [Pseudomonas]	NZ_RXVL01000080.1	6474	7490	-	4
			DMS_other	WYL	pseudo_subWP_020308716.1	WYL domain-containing protein [Pseudomonas stutzeri]	NZ_RXVL01000080.1	8589	9074	-	6
			RM_type_I	REase_I	WP_012077898.1	DEAD/DEAH box helicase family protein [Pseudomonas]	NZ_RXVL01000080.1	10598	12964	+	9
			RM_type_I	MTase_I	WP_049239323.1	type I restriction-modification system subunit M [Pseudomonas aeruginosa]	NZ_RXVL01000080.1	14325	15794	+	11
			RM_type_I	Specificity_I	WP_012077895.1	restriction endonuclease subunit S [Pseudomonas]	NZ_RXVL01000080.1	15791	17434	+	12
			PDC-S11	PDC-S11	WP_012077894.1	endonuclease NucS [Pseudomonas]	NZ_RXVL01000080.1	17452	18528	+	13
			zorya_type_I	ZorA1	WP_012077893.1	anti-phage defense ZorAB system protein ZorA [Pseudomonas]	NZ_RXVL01000080.1	18581	20707	+	14
			zorya_type_I	ZorB1	WP_012077892.1	OmpA family protein [Pseudomonas]	NZ_RXVL01000080.1	20707	21471	+	15
			zorya_type_I	ZorC1	WP_049239322.1	hypothetical protein [Pseudomonas aeruginosa]	NZ_RXVL01000080.1	21468	23480	+	16
			zorya_type_I	ZorD1	WP_025297649.1	DEAD/DEAH box helicase [Pseudomonas]	NZ_RXVL01000080.1	23481	26567	+	17
			PDC-S06	PDC-S06	WP_003118392.1	AAA family ATPase [Pseudomonas aeruginosa]	NZ_RXVL01000087.1	8592	11204	+	12
			shango	SngC	WP_003118393.1	DEAD/DEAH box helicase [Pseudomonas]	NZ_RXVL01000087.1	11350	13566	-	13
			shango	SngB	WP_003118394.1	ATP-binding protein [Pseudomonas]	NZ_RXVL01000087.1	13541	14836	-	14
			shango	SngA	WP_023106009.1	TerB N-terminal domain-containing protein [Pseudomonas]	NZ_RXVL01000087.1	14833	17319	-	15
			RM_type_II	REase_II	WP_071540815.1	ATP-binding protein [Pseudomonas aeruginosa]	NZ_RXVL01000089.1	8614	10716	+	12
			RM_type_II	MTase_II	WP_071540816.1	DNA cytosine methyltransferase [Pseudomonas aeruginosa]	NZ_RXVL01000089.1	10703	11929	-	13
			PDC-S09	PDC-S09	WP_001247892.1	nucleotidyltransferase [Bacteria]	NZ_RXVL01000092.1	8698	8988	+	11
		1899	PD-T4-6	PD-T4-6	WP_003114615.1	serine/threonine protein kinase [Pseudomonas]	NZ_RXVD01000001.1	249018	250007	-	235	18	67.14
			PT_SspABCD	SspD	WP_023132160.1	phosphoadenosine phosphosulfate reductase family protein [Pseudomonas aeruginosa]	NZ_RXVD01000005.1	285508	286335	-	260
			PT_SspABCD	SspC	WP_023132161.1	hypothetical protein [Pseudomonas aeruginosa]	NZ_RXVD01000005.1	286313	289774	-	261
			PT_SspABCD	SspB	WP_023132162.1	DUF4007 family protein [Pseudomonas aeruginosa]	NZ_RXVD01000005.1	289767	290675	-	262
			DRT_other	HTH_VI	WP_031640772.1	helix-turn-helix domain-containing protein [Pseudomonas aeruginosa]	NZ_RXVD01000005.1	458234	458455	+	429
			PDC-S08	PDC-S08	WP_077144870.1	5'-nucleotidase [Pseudomonas aeruginosa]	NZ_RXVD01000005.1	458488	459426	+	430
			retron_IV	2TM_IV	WP_126533964.1	retron Ec48 family effector membrane protein [Pseudomonas aeruginosa]	NZ_RXVD01000005.1	459430	460086	-	431
			retron_IV	RT_IV	WP_077144842.1	reverse transcriptase family protein [Pseudomonas aeruginosa]	NZ_RXVD01000005.1	460157	461350	-	432
			retron_IV	msr-msd	NA	msr-msd identified by match to covariance model: TypeIV	NZ_RXVD01000005.1	461376	461471	-	432.011
			CRISPR_array	CRISPR_array	CRISPR001	CRISPR001; repeat=CGCGCCCCGCACGGGCGCGTGGATTGAAAC; score=9.16	NZ_RXVD01000006.1	26802	28295	-	31.01
			cas_type_I-C	Cas2c	WP_031631544.1	CRISPR-associated endonuclease Cas2 [Pseudomonas aeruginosa]	NZ_RXVD01000006.1	28477	28767	-	32
			cas_type_I-C	Cas1c	WP_031631546.1	type I-C CRISPR-associated endonuclease Cas1c [Pseudomonas aeruginosa]	NZ_RXVD01000006.1	28777	29817	-	33
			cas_type_I-C	Cas4c	WP_031631548.1	CRISPR-associated protein Cas4 [Pseudomonas aeruginosa]	NZ_RXVD01000006.1	29821	30453	-	34
			cas_type_I-C	Cas7c	WP_031631550.1	type I-C CRISPR-associated protein Cas7/Csd2 [Pseudomonas aeruginosa]	NZ_RXVD01000006.1	30472	31341	-	35
			cas_type_I-C	Cas8c	WP_031631553.1	type I-C CRISPR-associated protein Cas8c/Csd1 [Pseudomonas aeruginosa]	NZ_RXVD01000006.1	31338	33131	-	36
			cas_type_I-C	Cas5c	WP_031631556.1	type I-C CRISPR-associated protein Cas5c [Pseudomonas aeruginosa]	NZ_RXVD01000006.1	33128	33802	-	37
			cas_type_I-C	Cas3c	WP_170870022.1	CRISPR-associated endonuclease Cas3'' [Pseudomonas aeruginosa]	NZ_RXVD01000006.1	33852	36086	-	38
			DMS_other	MTase_II	WP_079891792.1	site-specific DNA-methyltransferase [Pseudomonas aeruginosa]	NZ_RXVD01000007.1	121931	123055	+	125
			HEC-06	HEC-06	WP_077144330.1	DUF262 and DUF1524 domain-containing protein [Pseudomonas aeruginosa]	NZ_RXVD01000007.1	127368	129467	-	127
			RM_type_I	REase_I	WP_077144329.1	HsdR family type I site-specific deoxyribonuclease [Pseudomonas aeruginosa]	NZ_RXVD01000007.1	129477	132467	-	128
			RM_type_I	Specificity_I	WP_077144328.1	restriction endonuclease subunit S [Pseudomonas aeruginosa]	NZ_RXVD01000007.1	132442	133608	-	129
			RM_type_I	MTase_I	WP_121378635.1	type I restriction-modification system subunit M [Pseudomonas aeruginosa]	NZ_RXVD01000007.1	133601	135118	-	130
			RM_type_I	MTase_I	WP_077144326.1	type I restriction-modification system subunit M [Pseudomonas aeruginosa]	NZ_RXVD01000007.1	135115	136611	-	131
			DMS_other	WYL	WP_077144325.1	WYL domain-containing protein [Pseudomonas aeruginosa]	NZ_RXVD01000007.1	136625	137518	-	132
			Tiamat	TmtA	WP_121378634.1	DUF3883 domain-containing protein [Pseudomonas aeruginosa]	NZ_RXVD01000007.1	141120	145910	+	135
			RM_type_IIG	REase_MTase_IIG	WP_121378655.1	class I SAM-dependent DNA methyltransferase [Pseudomonas aeruginosa]	NZ_RXVD01000011.1	109239	112004	+	106
			CRISPR_array	CRISPR_array	CRISPR002	CRISPR002; repeat=GTTCACTGCCGTATAGGCAGCTAAGAAA; score=6.26	NZ_RXVD01000013.1	498482	499229	+	456.01
			PDC-S02	PDC-S02	WP_039388943.1	PDDEXK nuclease domain-containing protein [Proteobacteria]	NZ_RXVD01000016.1	36552	37616	+	34
			PDC-S06	PDC-S06	WP_039388940.1	AAA family ATPase [Proteobacteria]	NZ_RXVD01000016.1	38571	40874	-	36
			PDC-S35	PDC-S35	WP_180739333.1	nucleotide-binding protein [Proteobacteria]	NZ_RXVD01000016.1	45302	46009	+	41
			DMS_other	MTase_I	WP_023132649.1	type I restriction-modification system subunit M [Pseudomonas aeruginosa]	NZ_RXVD01000016.1	325017	326492	-	295
			DMS_other	Specificity_I	WP_023132647.1	restriction endonuclease subunit S [Pseudomonas aeruginosa]	NZ_RXVD01000016.1	328446	330035	-	297
			SoFic	SoFic	WP_003117952.1	Fic family protein [Pseudomonas]	NZ_RXVD01000020.1	77857	78978	+	79
			CRISPR_array	CRISPR_array	CRISPR003	CRISPR003; repeat=GTTCACTGCCGTATAGGCAGCTAAGAAA; score=6.15	NZ_RXVD01000038.1	37716	38524	+	24.01
			cas_type_I-F1	Cas6f	WP_009876500.1	type I-F CRISPR-associated endoribonuclease Cas6/Csy4 [Pseudomonas aeruginosa]	NZ_RXVD01000038.1	38648	39211	-	25
			cas_type_I-F1	Cas7f	WP_003143949.1	type I-F CRISPR-associated protein Csy3 [Pseudomonas]	NZ_RXVD01000038.1	39215	40243	-	26
			cas_type_I-F1	Cas5f	WP_009876498.1	type I-F CRISPR-associated protein Csy2 [Pseudomonas aeruginosa]	NZ_RXVD01000038.1	40254	41237	-	27
			cas_type_I-F1	Cas8f	WP_009876497.1	type I-F CRISPR-associated protein Csy1 [Pseudomonas aeruginosa]	NZ_RXVD01000038.1	41224	42528	-	28
			cas_type_I-F1	Cas23f	WP_009876496.1	type I-F CRISPR-associated helicase Cas3f [Pseudomonas aeruginosa]	NZ_RXVD01000038.1	42586	45816	-	29
			cas_type_I-F1	Cas1f	WP_077144831.1	type I-F CRISPR-associated endonuclease Cas1f [Pseudomonas aeruginosa]	NZ_RXVD01000038.1	45813	46787	-	30
			CRISPR_array	CRISPR_array	CRISPR004	CRISPR004; repeat=GTTCACTGCCGTGTAGGCAGCTAAGAAA; score=6.26	NZ_RXVD01000038.1	47048	47795	-	30.02
			retron_III-A	RT_III-A	WP_077144416.1	reverse transcriptase family protein [Pseudomonas aeruginosa]	NZ_RXVD01000039.1	62193	63215	-	65
			retron_III-A	msr-msd	NA	msr-msd identified by match to covariance model: TypeIIIA2	NZ_RXVD01000039.1	63223	63451	-	65.011
			retron_III-A	WH_III-A	WP_126534043.1	hypothetical protein [Pseudomonas aeruginosa]	NZ_RXVD01000039.1	63475	63837	-	66
			retron_III-A	PRTase_III-A	WP_126534045.1	hypothetical protein [Pseudomonas aeruginosa]	NZ_RXVD01000039.1	63837	64682	-	67
		1902	PD-T4-6	PD-T4-6	WP_003097784.1	serine/threonine protein kinase [Pseudomonas]	NZ_RXVC01000010.1	184897	185886	+	169	5	27.14
			HEC-01	HEC-01A	WP_023088929.1	ATP-binding protein [Pseudomonas aeruginosa]	NZ_RXVC01000013.1	735	1874	+	1
			HEC-01	HEC-01B	WP_071535981.1	DUF4276 family protein [Pseudomonas aeruginosa]	NZ_RXVC01000013.1	1883	2476	+	2
			wadjet_type_I	JetD1	WP_071536696.1	DUF3322 and DUF2220 domain-containing protein [Pseudomonas aeruginosa]	NZ_RXVC01000023.1	2714	3877	-	4
			wadjet_type_I	JetC1	WP_126556244.1	ATP-binding protein [Pseudomonas aeruginosa]	NZ_RXVC01000023.1	3864	7238	-	5
			wadjet_type_I	JetB1	WP_034072003.1	DUF4194 domain-containing protein [Pseudomonas aeruginosa]	NZ_RXVC01000023.1	7235	7942	-	6
			wadjet_type_I	JetA1	WP_034072005.1	DUF3375 domain-containing protein [Pseudomonas aeruginosa]	NZ_RXVC01000023.1	7929	9389	-	7
			DMS_other	WYL	WP_034019480.1	WYL domain-containing protein [Proteobacteria]	NZ_RXVC01000023.1	9547	10446	+	8
			RM_type_III	MTase_III	WP_126556246.1	site-specific DNA-methyltransferase [Pseudomonas aeruginosa]	NZ_RXVC01000023.1	14470	16482	+	11
			RM_type_III	REase_III	WP_126556249.1	DEAD/DEAH box helicase family protein [Pseudomonas aeruginosa]	NZ_RXVC01000023.1	16493	19597	+	12
		1906	PDC-S39	PDC-S39	WP_003112392.1	hypothetical protein [Pseudomonas]	NZ_RXVB01000003.1	66747	68576	+	66	24	22.86
			helicase-DUF2290	DUF2290	WP_003112393.1	DUF2290 domain-containing protein [Pseudomonas]	NZ_RXVB01000003.1	69079	69780	-	67
			helicase-DUF2290	Helicase	WP_003159898.1	DEAD/DEAH box helicase [Pseudomonas]	NZ_RXVB01000003.1	69773	71908	-	68
			PD-T4-6	PD-T4-6	WP_003097784.1	serine/threonine protein kinase [Pseudomonas]	NZ_RXVB01000005.1	178643	179632	+	164
			DMS_other	SspD	WP_126566494.1	hypothetical protein [Pseudomonas aeruginosa]	NZ_RXVB01000005.1	312721	313506	-	303
			DMS_other	MTase_II	WP_126621699.1	DNA adenine methylase [Pseudomonas aeruginosa]	NZ_RXVB01000005.1	313503	314360	-	304
			GAO_19	SIR2	WP_031691097.1	SIR2 family protein [Pseudomonas aeruginosa]	NZ_RXVB01000006.1	9800	10813	+	9
			GAO_19	HerA	WP_031691095.1	ATP-binding protein [Pseudomonas aeruginosa]	NZ_RXVB01000006.1	10824	12551	+	10
			SoFic	SoFic	WP_003117952.1	Fic family protein [Pseudomonas]	NZ_RXVB01000009.1	329727	330848	-	316
			RM_type_I	Specificity_I	WP_126621716.1	N-6 DNA methylase [Pseudomonas aeruginosa]	NZ_RXVB01000010.1	3692	5458	+	5
			RM_type_I	MTase_I	WP_126621717.1	type I restriction-modification system subunit M [Pseudomonas aeruginosa]	NZ_RXVB01000010.1	5535	7952	+	6
			RM_type_I	Specificity_I	WP_126621718.1	restriction endonuclease subunit S [Pseudomonas aeruginosa]	NZ_RXVB01000010.1	7949	9196	+	7
			RM_type_I	REase_I	WP_126621720.1	HsdR family type I site-specific deoxyribonuclease [Pseudomonas aeruginosa]	NZ_RXVB01000010.1	10955	14065	+	10
			cbass_type_III	Effector	WP_003050273.1	cbass effector endonuclease NucC [Proteobacteria]	NZ_RXVB01000014.1	160503	161228	-	148
			cbass_type_III	Cyclase	WP_003153640.1	nucleotidyltransferase domain-containing protein [Proteobacteria]	NZ_RXVB01000014.1	161267	162169	-	149
			cbass_type_III	HORMA	WP_003090159.1	hypothetical protein [Proteobacteria]	NZ_RXVB01000014.1	162169	162669	-	150
			cbass_type_III	HORMA	WP_003153638.1	hypothetical protein [Proteobacteria]	NZ_RXVB01000014.1	162666	163136	-	151
			cbass_type_III	TRIP13	WP_003050256.1	AAA family ATPase [Proteobacteria]	NZ_RXVB01000014.1	163133	164047	-	152
			RM_type_IIG	REase_MTase_IIG	WP_126621750.1	class I SAM-dependent DNA methyltransferase [Pseudomonas aeruginosa]	NZ_RXVB01000014.1	385866	390767	-	350
			zorya_type_I	ZorD1	WP_031691256.1	DEAD/DEAH box helicase [Pseudomonas aeruginosa]	NZ_RXVB01000014.1	394387	397416	-	352
			zorya_type_I	ZorC1	WP_031691254.1	hypothetical protein [Pseudomonas aeruginosa]	NZ_RXVB01000014.1	397424	399595	-	353
			zorya_type_I	ZorB1	WP_031691253.1	OmpA family protein [Pseudomonas aeruginosa]	NZ_RXVB01000014.1	399592	400335	-	354
			zorya_type_I	ZorA1	WP_031691251.1	anti-phage defense ZorAB system protein ZorA [Pseudomonas aeruginosa]	NZ_RXVB01000014.1	400335	402683	-	355
			PDC-S06	PDC-S06	WP_031690927.1	AAA family ATPase [Pseudomonas aeruginosa]	NZ_RXVB01000025.1	48487	50640	-	46
			RM_type_I	REase_I	WP_010793760.1	type I restriction endonuclease subunit R [Pseudomonas]	NZ_RXVB01000026.1	22084	25236	-	20
			cbass_type_I	Effector	WP_071536034.1	SLATT domain-containing protein [Pseudomonas]	NZ_RXVB01000026.1	25281	25853	-	21
			cbass_type_I	Cyclase	WP_010793761.1	nucleotidyltransferase [Pseudomonas]	NZ_RXVB01000026.1	25846	27156	-	22
			RM_type_I	Specificity_I	WP_010793762.1	restriction endonuclease subunit S [Pseudomonas]	NZ_RXVB01000026.1	27170	28447	-	23
			RM_type_I	MTase_I	WP_010793763.1	type I restriction-modification system subunit M [Pseudomonas]	NZ_RXVB01000026.1	28437	30152	-	24
			PDC-S02	PDC-S02	WP_010793764.1	restriction endonuclease [Pseudomonas]	NZ_RXVB01000026.1	30473	31465	-	25
			AbiE	AbiEii	pseudo_subWP_011829993.1	nucleotidyl transferase AbiEii/AbiGii toxin family protein [Proteobacteria]	NZ_RXVB01000030.1	7201	8119	-	7
			AbiE	AbiEi	WP_126621808.1	type IV toxin-antitoxin system AbiEi family antitoxin domain-containing protein [Pseudomonas aeruginosa]	NZ_RXVB01000030.1	8112	8870	-	8
			DMS_other	mad1	WP_031653361.1	helix-turn-helix domain-containing protein [Proteobacteria]	NZ_RXVB01000030.1	23736	23936	+	26
			DMS_other	DrmD	WP_126621819.1	DEAD/DEAH box helicase [Pseudomonas aeruginosa]	NZ_RXVB01000030.1	23995	26874	+	27
			ietAS	IetA	WP_003141003.1	AAA family ATPase [Proteobacteria]	NZ_RXVB01000030.1	26955	27941	+	28
			ietAS	IetS	WP_126621820.1	S8 family peptidase [Pseudomonas aeruginosa]	NZ_RXVB01000030.1	28106	30298	+	29
			RM_type_III	MTase_III	WP_013982133.1	site-specific DNA-methyltransferase [Pseudomonas]	NZ_RXVB01000030.1	30316	31998	+	30
			RM_type_III	REase_III	WP_126621830.1	DEAD/DEAH box helicase family protein [Pseudomonas aeruginosa]	NZ_RXVB01000030.1	31998	34733	+	31
			PDC-S06	PDC-S06	WP_023100447.1	AAA family ATPase [Pseudomonas]	NZ_RXVB01000037.1	26794	29391	-	24
			gabija	GajA	WP_031691317.1	AAA family ATPase [Pseudomonas]	NZ_RXVB01000037.1	41844	43715	+	38
			gabija	GajB	WP_078451231.1	ATP-dependent helicase [Pseudomonas]	NZ_RXVB01000037.1	43712	45424	+	39
			wadjet_other	JetD	WP_031690890.1	DUF2220 family protein [Pseudomonas]	NZ_RXVB01000038.1	43025	44185	-	39
			wadjet_other	JetC	WP_171889859.1	hypothetical protein [Pseudomonas]	NZ_RXVB01000038.1	44169	47474	-	40
			wadjet_other	JetB	WP_126621838.1	DUF4194 domain-containing protein [Pseudomonas aeruginosa]	NZ_RXVB01000038.1	47471	48067	-	41
			cas_type_other	Cas23f	WP_010793036.1	type I-F CRISPR-associated helicase Cas3f [Pseudomonas]	NZ_RXVB01000040.1	109	3339	-	1
			cas_type_other	Cas1f	WP_010793035.1	type I-F CRISPR-associated endonuclease Cas1f [Pseudomonas]	NZ_RXVB01000040.1	3336	4310	-	2
			CRISPR_array	CRISPR_array	CRISPR001	CRISPR001; repeat=GTTCACTGCCGTGTAGGCAGCTAAGAAA; score=6.26	NZ_RXVB01000040.1	4572	6099	-	2.01
			PD-T7-1or5	PD-T7-1	WP_049950726.1	hypothetical protein [Pseudomonas]	NZ_RXVB01000054.1	2890	4272	-	4
			cas_type_I-F1	Cas8f	WP_126621867.1	type I-F CRISPR-associated protein Csy1, partial [Pseudomonas aeruginosa]	NZ_RXVB01000059.1	1	1263	+	1
			cas_type_I-F1	Cas5f	WP_003116910.1	type I-F CRISPR-associated protein Csy2 [Pseudomonas]	NZ_RXVB01000059.1	1250	2233	+	2
			cas_type_I-F1	Cas7f	WP_003143949.1	type I-F CRISPR-associated protein Csy3 [Pseudomonas]	NZ_RXVB01000059.1	2244	3272	+	3
			cas_type_I-F1	Cas6f	WP_003162920.1	type I-F CRISPR-associated endoribonuclease Cas6/Csy4 [Pseudomonas]	NZ_RXVB01000059.1	3276	3839	+	4
			CRISPR_array	CRISPR_array	CRISPR002	CRISPR002; repeat=GTTCACTGCCGTATAGGCAGCTAAGAAA; score=6.17	NZ_RXVB01000059.1	3963	5130	-	4.01
		1925	PDC-S02	PDC-S02	WP_020750775.1	PDDEXK nuclease domain-containing protein [Proteobacteria]	NZ_RXVA01000003.1	42836	43900	-	45	21	32.86
			PD-T4-6	PD-T4-6	WP_003097784.1	serine/threonine protein kinase [Pseudomonas]	NZ_RXVA01000007.1	20330	21319	+	17
			DMS_other	mad3	pseudo_subWP_003253154.1	DNA replication/repair protein RecF [Pseudomonas]	NZ_RXVA01000013.1	223631	224733	+	206
			DMS_other	BrxHI	WP_044288711.1	DEAD/DEAH box helicase [Pseudomonas]	NZ_RXVA01000013.1	228613	231030	-	210
			HEC-06	HEC-06	WP_025986377.1	DUF262 domain-containing protein [Pseudomonas aeruginosa]	NZ_RXVA01000020.1	152805	154499	+	142
			DRT_class_II	Drt2	WP_016851804.1	reverse transcriptase/maturase family protein [Pseudomonas]	NZ_RXVA01000020.1	163468	164757	+	153
			cbass_type_II	capP	WP_023093136.1	ImmA/IrrE family metallo-endopeptidase [Gammaproteobacteria]	NZ_RXVA01000021.1	10333	11202	-	13
			cbass_type_II	capH	WP_025297728.1	helix-turn-helix domain-containing protein [Gammaproteobacteria]	NZ_RXVA01000021.1	11205	11594	-	14
			PDC-S16	PDC-S16	WP_023093135.1	DUF2188 domain-containing protein [Proteobacteria]	NZ_RXVA01000021.1	11882	12106	+	15
			cbass_type_II	Effector	WP_023093134.1	patatin-like phospholipase family protein [Gammaproteobacteria]	NZ_RXVA01000021.1	12113	13114	+	16
			cbass_type_II	Cyclase	WP_023093133.1	hypothetical protein [Gammaproteobacteria]	NZ_RXVA01000021.1	13108	14250	+	17
			cbass_type_II	E1-E2	WP_023093132.1	ThiF family adenylyltransferase [Gammaproteobacteria]	NZ_RXVA01000021.1	14247	15878	+	18
			cbass_type_II	JAB	WP_071536146.1	Mov34/MPN/PAD-1 family protein [Gammaproteobacteria]	NZ_RXVA01000021.1	15866	16342	+	19
			DMS_other	DrmC	WP_031637507.1	DISARM system phospholipase D-like protein DrmC [Gammaproteobacteria]	NZ_RXVA01000021.1	16638	17399	-	21
			DMS_other	DrmB	WP_023093129.1	DUF1998 domain-containing protein [Gammaproteobacteria]	NZ_RXVA01000021.1	17401	19257	-	22
			DMS_other	DrmA	WP_031642511.1	DISARM system helicase DrmA [Pseudomonas aeruginosa]	NZ_RXVA01000021.1	19260	23258	-	23
			DMS_other	DrmD	WP_023093126.1	DISARM system SNF2-like helicase DrmD [Pseudomonas]	NZ_RXVA01000022.1	1106	4237	-	2
			DMS_other	REase_II	WP_023093125.1	ATP-binding protein [Gammaproteobacteria]	NZ_RXVA01000022.1	4249	6216	-	3
			RM_type_IIG	REase_MTase_IIG	WP_126649785.1	ATP phosphoribosyltransferase regulatory subunit [Pseudomonas aeruginosa]	NZ_RXVA01000022.1	6213	10616	-	4
			DMS_other	DrmD	WP_023093122.1	DISARM system SNF2-like helicase DrmD [Proteobacteria]	NZ_RXVA01000022.1	11245	14376	-	6
			VSPR	Vsr	WP_023093121.1	very short patch repair endonuclease [Proteobacteria]	NZ_RXVA01000022.1	14398	14856	-	7
			VSPR	MTase_II	WP_196641781.1	DNA cytosine methyltransferase [Gammaproteobacteria]	NZ_RXVA01000022.1	14878	15921	-	8
			DMS_other	mad1	WP_023093119.1	helix-turn-helix domain-containing protein [Proteobacteria]	NZ_RXVA01000022.1	16084	16281	-	9
			AbiE	AbiEi	WP_053461241.1	type IV toxin-antitoxin system AbiEi family antitoxin domain-containing protein [Gammaproteobacteria]	NZ_RXVA01000023.1	7651	8409	+	9
			AbiE	AbiEii	WP_013721904.1	nucleotidyl transferase AbiEii/AbiGii toxin family protein [Proteobacteria]	NZ_RXVA01000023.1	8402	9322	+	10
			Pycsar_effector	PycTIR	WP_010562503.1	nucleotide-binding protein [Pseudomonas]	NZ_RXVA01000025.1	63161	64087	+	53
			Pycsar_effector	PycC	WP_003127475.1	transcriptional regulator [Pseudomonas]	NZ_RXVA01000025.1	64168	65712	+	54
			SoFic	SoFic	WP_016852405.1	Fic family protein [Pseudomonas]	NZ_RXVA01000030.1	50544	51665	+	48
			PDC-M66	PDC-M66A	WP_223813021.1	hypothetical protein, partial [Pseudomonas aeruginosa]	NZ_RXVA01000033.1	1	632	+	1
			PDC-M66	PDC-M66B	WP_071536973.1	DUF3037 domain-containing protein [Pseudomonas]	NZ_RXVA01000033.1	629	1483	+	2
			gabija	GajA	WP_020750919.1	AAA family ATPase [Pseudomonas aeruginosa]	NZ_RXVA01000035.1	1273	3129	+	3
			gabija	GajB	WP_003117144.1	UvrD-helicase domain-containing protein [Pseudomonas]	NZ_RXVA01000035.1	3126	4838	+	4
			cbass_type_III	TRIP13	WP_003050256.1	AAA family ATPase [Proteobacteria]	NZ_RXVA01000036.1	27919	28833	+	32
			cbass_type_III	HORMA	WP_003153638.1	hypothetical protein [Proteobacteria]	NZ_RXVA01000036.1	28830	29300	+	33
			cbass_type_III	HORMA	WP_003090159.1	hypothetical protein [Proteobacteria]	NZ_RXVA01000036.1	29297	29797	+	34
			cbass_type_III	Cyclase	WP_003153640.1	nucleotidyltransferase domain-containing protein [Proteobacteria]	NZ_RXVA01000036.1	29797	30699	+	35
			cbass_type_III	Effector	WP_003050273.1	cbass effector endonuclease NucC [Proteobacteria]	NZ_RXVA01000036.1	30738	31463	+	36
			SoFic	SoFic	WP_003161388.1	Fic family protein [Pseudomonas]	NZ_RXVA01000040.1	20999	22099	-	10
			PDC-M30	PDC-M30A	WP_003111048.1	three-Cys-motif partner protein TcmP [Pseudomonas]	NZ_RXVA01000063.1	4731	6047	-	7
			PDC-M30	PDC-M30B	WP_003111049.1	phage Gp37/Gp68 family protein [Pseudomonas]	NZ_RXVA01000063.1	6069	6812	-	8
			Lamassu_Family	LmuA	WP_079392265.1	hypothetical protein [Pseudomonas]	NZ_RXVA01000077.1	7016	8452	+	7
			Lamassu_Family	LmuB	WP_034022976.1	AAA family ATPase [Pseudomonas]	NZ_RXVA01000077.1	9150	11540	+	9
			Mokosh_TypeI	MkoB	pseudo_subWP_009681706.1	hypothetical protein [Pseudomonas]	NZ_RXVA01000088.1	1	774	-	1
			Mokosh_TypeI	MkoA	WP_009681705.1	NERD domain-containing protein [Pseudomonas]	NZ_RXVA01000088.1	767	5725	-	2
		1938	PD-T4-6	PD-T4-6	WP_003097784.1	serine/threonine protein kinase [Pseudomonas]	NZ_RXUZ01000015.1	123110	124099	-	127	15	34.29
			HEC-06	HEC-06	WP_016851799.1	DUF262 domain-containing protein [Pseudomonas]	NZ_RXUZ01000018.1	41777	43444	+	38
			DRT_class_II	Drt2	WP_016851804.1	reverse transcriptase/maturase family protein [Pseudomonas]	NZ_RXUZ01000018.1	52413	53702	+	48
			cbass_type_III	TRIP13	WP_016852809.1	AAA family ATPase [Proteobacteria]	NZ_RXUZ01000021.1	169057	169971	+	167
			cbass_type_III	HORMA	WP_003090160.1	hypothetical protein [Proteobacteria]	NZ_RXUZ01000021.1	169968	170438	+	168
			cbass_type_III	HORMA	WP_003090159.1	hypothetical protein [Proteobacteria]	NZ_RXUZ01000021.1	170435	170935	+	169
			cbass_type_III	Cyclase	WP_003090158.1	nucleotidyltransferase domain-containing protein [Proteobacteria]	NZ_RXUZ01000021.1	170935	171837	+	170
			cbass_type_III	Effector	WP_043555297.1	cbass effector endonuclease NucC [Proteobacteria]	NZ_RXUZ01000021.1	171876	172601	+	171
			Lamassu_Family	LmuB	WP_033981940.1	AAA family ATPase [Proteobacteria]	NZ_RXUZ01000031.1	199277	201154	-	196
			Lamassu_Family	LmuC	WP_033981941.1	hypothetical protein [Proteobacteria]	NZ_RXUZ01000031.1	201151	201645	-	197
			Lamassu_Family	LmuA	WP_033981942.1	hypothetical protein [Proteobacteria]	NZ_RXUZ01000031.1	201642	202730	-	198
			RM_type_III	REase_III	WP_008266576.1	DEAD/DEAH box helicase family protein [Proteobacteria]	NZ_RXUZ01000031.1	243052	246057	-	235
			RM_type_III	MTase_III	pseudo_subWP_012206008.1	site-specific DNA-methyltransferase [Proteobacteria]	NZ_RXUZ01000031.1	246069	248055	-	236
			DMS_other	WYL	WP_058132764.1	WYL domain-containing protein [Pseudomonas aeruginosa]	NZ_RXUZ01000031.1	253921	254829	-	240
			ietAS	IetA	WP_033982009.1	AAA family ATPase [Proteobacteria]	NZ_RXUZ01000031.1	256397	257428	+	243
			ietAS	IetS	WP_079379039.1	S8 family peptidase [Pseudomonas aeruginosa]	NZ_RXUZ01000031.1	257634	259919	+	244
			SoFic	SoFic	WP_016852405.1	Fic family protein [Pseudomonas]	NZ_RXUZ01000034.1	80808	81929	+	80
			PDC-S02	PDC-S02	WP_020750775.1	PDDEXK nuclease domain-containing protein [Proteobacteria]	NZ_RXUZ01000080.1	33532	34596	-	37
			PDC-S02	PDC-S02	WP_103018485.1	PDDEXK nuclease domain-containing protein [Proteobacteria]	NZ_RXUZ01000105.1	14735	15898	+	18
			PDC-S02	PDC-S02	WP_019726270.1	PDDEXK nuclease domain-containing protein [Proteobacteria]	NZ_RXUZ01000109.1	60966	62030	-	81
			SoFic	SoFic	WP_003161388.1	Fic family protein [Pseudomonas]	NZ_RXUZ01000114.1	19821	20921	-	10
			DMS_other	DrmC	WP_133458288.1	transposase, partial [Pseudomonas aeruginosa]	NZ_RXUZ01000128.1	1	254	-	1
			DMS_other	BrxHI	WP_044288711.1	DEAD/DEAH box helicase [Pseudomonas]	NZ_RXUZ01000128.1	365	2782	-	2
			PD-T4-7	PD-T4-7	WP_023093038.1	hypothetical protein [Pseudomonas aeruginosa]	NZ_RXUZ01000134.1	1290	2147	+	2
		1948	SoFic	SoFic	WP_003113218.1	Fic family protein [Pseudomonas]	NZ_RXUY01000015.1	8698	9819	-	13	16	54.29
			AbiD	AbiD	WP_017001537.1	Abi family protein [Pseudomonas]	NZ_RXUY01000015.1	10287	11276	-	14
			PD-T4-6	PD-T4-6	WP_003097784.1	serine/threonine protein kinase [Pseudomonas]	NZ_RXUY01000037.1	131425	132414	+	122
			RM_type_IIG	REase_MTase_IIG	WP_023113859.1	BREX-1 system adenine-specific DNA-methyltransferase PglX [Pseudomonas aeruginosa]	NZ_RXUY01000041.1	2177	5746	-	3
			PDC-S24	PDC-S24	WP_023113860.1	Fic family protein [Pseudomonas aeruginosa]	NZ_RXUY01000041.1	5885	7363	-	4
			DMS_other	BrxC	WP_023124092.1	BREX system P-loop protein BrxC [Pseudomonas aeruginosa]	NZ_RXUY01000041.1	9250	12921	-	7
			DMS_other	BrxB	WP_023113864.1	DUF1788 domain-containing protein [Pseudomonas aeruginosa]	NZ_RXUY01000041.1	12940	13515	-	8
			DMS_other	BrxA	WP_023113865.1	DUF1819 family protein [Pseudomonas aeruginosa group]	NZ_RXUY01000041.1	13538	14155	-	9
			DMS_other	WYL	WP_023113866.1	WYL domain-containing protein [Pseudomonas aeruginosa group]	NZ_RXUY01000041.1	14152	15021	-	10
			gabija	GajA	WP_023113868.1	AAA family ATPase [Pseudomonas aeruginosa]	NZ_RXUY01000041.1	15680	17818	+	12
			DMS_other	mad3	WP_023113868.1	AAA family ATPase [Pseudomonas aeruginosa]	NZ_RXUY01000041.1	15680	17818	+	12
			gabija	GajB	WP_023113869.1	ATP-dependent helicase [Pseudomonas]	NZ_RXUY01000041.1	17818	19599	+	13
			PDC-S13	PDC-S13	WP_023113725.1	hypothetical protein [Pseudomonas aeruginosa]	NZ_RXUY01000049.1	60197	61066	-	69
			cbass_type_III	TRIP13	WP_016852809.1	AAA family ATPase [Proteobacteria]	NZ_RXUY01000049.1	199730	200644	+	220
			cbass_type_III	HORMA	WP_003090160.1	hypothetical protein [Proteobacteria]	NZ_RXUY01000049.1	200641	201111	+	221
			cbass_type_III	HORMA	WP_003090159.1	hypothetical protein [Proteobacteria]	NZ_RXUY01000049.1	201108	201608	+	222
			cbass_type_III	Cyclase	WP_003090158.1	nucleotidyltransferase domain-containing protein [Proteobacteria]	NZ_RXUY01000049.1	201608	202510	+	223
			cbass_type_III	Effector	WP_003050273.1	cbass effector endonuclease NucC [Proteobacteria]	NZ_RXUY01000049.1	202549	203274	+	224
			CRISPR_array	CRISPR_array	CRISPR001	CRISPR001; repeat=GTTCACTGCCGTATAGGCAGCTAAGAAA; score=6.24	NZ_RXUY01000085.1	327	895	-	0.01
			shango	SngC	WP_020750859.1	DEAD/DEAH box helicase [Pseudomonas aeruginosa]	NZ_RXUY01000100.1	2039	4261	-	3
			shango	SngB	WP_031628587.1	ATP-binding protein [Pseudomonas aeruginosa]	NZ_RXUY01000100.1	4236	5531	-	4
			shango	SngA	WP_023099096.1	TerB N-terminal domain-containing protein [Pseudomonas aeruginosa]	NZ_RXUY01000100.1	5528	8395	-	5
			DMS_other	BrxL	WP_023113829.1	protease Lon-related BREX system protein BrxL [Pseudomonas]	NZ_RXUY01000111.1	61213	63252	-	66
			DMS_other	PglZ	WP_023113830.1	BREX-1 system phosphatase PglZ type A [Pseudomonas aeruginosa]	NZ_RXUY01000111.1	63265	65892	-	67
			HEC-08	HEC-08	WP_016263565.1	hypothetical protein [Pseudomonas]	NZ_RXUY01000112.1	47782	48921	+	45
			argonaute_type_I	Aga_REase-PNTD1-PNTD2	WP_016263566.1	SMEK domain-containing protein [Pseudomonas]	NZ_RXUY01000112.1	49173	50642	+	46
			argonaute_type_I	pAgo_I	WP_016263567.1	hypothetical protein [Pseudomonas]	NZ_RXUY01000112.1	50632	52047	+	47
			CRISPR_array	CRISPR_array	CRISPR002	CRISPR002; repeat=GTTCACTGCCGTATAGGCAGCTAAGAAA; score=6.10	NZ_RXUY01000120.1	38102	38727	+	24.01
			cas_type_I-F1	Cas6f	WP_023087476.1	type I-F CRISPR-associated endoribonuclease Cas6/Csy4 [Pseudomonas]	NZ_RXUY01000120.1	38852	39415	-	25
			cas_type_I-F1	Cas7f	WP_003143949.1	type I-F CRISPR-associated protein Csy3 [Pseudomonas]	NZ_RXUY01000120.1	39419	40447	-	26
			cas_type_I-F1	Cas5f	WP_023087477.1	type I-F CRISPR-associated protein Csy2 [Pseudomonas]	NZ_RXUY01000120.1	40458	41441	-	27
			cas_type_I-F1	Cas8f	WP_023087478.1	type I-F CRISPR-associated protein Csy1 [Pseudomonas]	NZ_RXUY01000120.1	41428	42729	-	28
			cas_type_I-F1	Cas23f	WP_003143954.1	type I-F CRISPR-associated helicase Cas3f [Pseudomonas]	NZ_RXUY01000120.1	43140	46370	-	29
			cas_type_I-F1	Cas1f	WP_003139228.1	type I-F CRISPR-associated endonuclease Cas1f [Pseudomonas]	NZ_RXUY01000120.1	46367	47341	-	30
			CRISPR_array	CRISPR_array	CRISPR003	CRISPR003; repeat=GTTCACTGCCGTGTAGGCAGCTAAGAAA; score=6.26	NZ_RXUY01000120.1	47593	48160	-	30.02
			PDC-S02	PDC-S02	WP_126558566.1	PDDEXK nuclease domain-containing protein [Pseudomonas]	NZ_RXUY01000123.1	45	986	+	1
			Lamassu_Family	LmuA	WP_023092912.1	hypothetical protein [Pseudomonas aeruginosa]	NZ_RXUY01000132.1	1149	2372	+	2
			Lamassu_Family	LmuC	WP_023094350.1	DUF6521 family protein [Pseudomonas aeruginosa]	NZ_RXUY01000132.1	2369	2857	+	3
			Lamassu_Family	LmuB	WP_023092910.1	DUF3732 domain-containing protein [Pseudomonas aeruginosa]	NZ_RXUY01000132.1	2854	4809	+	4
		2101	cbass_type_II	Effector	WP_124207067.1	SAVED domain-containing protein [Pseudomonas aeruginosa]	NZ_RXUT01000001.1	121371	122552	-	109	9	72.86
			cbass_type_II	JAB	WP_093976203.1	Mov34/MPN/PAD-1 family protein [Pseudomonas aeruginosa]	NZ_RXUT01000001.1	122521	123027	-	110
			cbass_type_II	E1-E2	WP_093976202.1	ThiF family adenylyltransferase [Pseudomonas aeruginosa]	NZ_RXUT01000001.1	123024	124757	-	111
			cbass_type_II	Cyclase	WP_024928329.1	nucleotidyltransferase [Pseudomonas aeruginosa]	NZ_RXUT01000001.1	124754	125767	-	112
			SoFic	SoFic	WP_003117952.1	Fic family protein [Pseudomonas]	NZ_RXUT01000033.1	77358	78479	-	87
			RM_type_II	REase_II	WP_124207247.1	HNH endonuclease [Pseudomonas aeruginosa]	NZ_RXUT01000036.1	62746	63384	+	64
			RM_type_II	MTase_II	WP_124207246.1	DNA cytosine methyltransferase [Pseudomonas aeruginosa]	NZ_RXUT01000036.1	63313	64458	-	65
			PD-T4-6	PD-T4-6	WP_003087629.1	serine/threonine protein kinase [Pseudomonas]	NZ_RXUT01000058.1	20382	21371	+	17
			wadjet_type_I	JetA1	WP_071534647.1	DUF3375 domain-containing protein [Pseudomonas]	NZ_RXUT01000070.1	80215	81714	+	76
			wadjet_type_I	JetB1	WP_015647862.1	DUF4194 domain-containing protein [Pseudomonas]	NZ_RXUT01000070.1	81717	82466	+	77
			wadjet_type_I	JetC1	WP_124207357.1	hypothetical protein [Pseudomonas aeruginosa]	NZ_RXUT01000070.1	82463	85768	+	78
			wadjet_type_I	JetD1	WP_034038672.1	DUF2220 family protein [Pseudomonas aeruginosa]	NZ_RXUT01000070.1	85752	86933	+	79
			argonaute_type_III	PprPIWI	WP_079391257.1	RNaseH domain-containing protein [Pseudomonas aeruginosa]	NZ_RXUT01000070.1	87175	89526	-	80
			argonaute_type_III	PprDinG	WP_024928872.1	hypothetical protein [Pseudomonas aeruginosa]	NZ_RXUT01000070.1	89523	92597	-	81
			argonaute_type_III	PprRE	WP_024928871.1	hypothetical protein [Pseudomonas]	NZ_RXUT01000070.1	92581	93621	-	82
			PD-Lambda-2	PD-Lambda-2_A	WP_071535862.1	type II toxin-antitoxin system HigB family toxin [Pseudomonas aeruginosa]	NZ_RXUT01000091.1	11779	12042	+	12
			PD-Lambda-2	PD-Lambda-2_B	WP_071535863.1	ImmA/IrrE family metallo-endopeptidase [Pseudomonas aeruginosa]	NZ_RXUT01000091.1	12048	13265	+	13
			PD-Lambda-2	PD-Lambda-2_C	WP_124207395.1	beta family protein [Pseudomonas aeruginosa]	NZ_RXUT01000091.1	13262	14395	+	14
			VSPR	Vsr	WP_003451864.1	DNA mismatch endonuclease Vsr [Pseudomonas]	NZ_RXUT01000102.1	1353	1802	-	2
			VSPR	MTase_II	WP_034015286.1	DNA cytosine methyltransferase [Pseudomonas aeruginosa]	NZ_RXUT01000102.1	1832	3430	+	3
			mza	mzaB	WP_034015287.1	ATP-binding protein [Pseudomonas aeruginosa]	NZ_RXUT01000102.1	3507	4949	+	4
			mza	mzaC	WP_010793100.1	Z1 domain-containing protein [Pseudomonas]	NZ_RXUT01000102.1	4963	7806	+	5
			mza	mzaD	WP_010793101.1	PD-(D/E)XK motif protein [Pseudomonas]	NZ_RXUT01000102.1	7790	8806	+	6
			mza	mzaE	WP_034015282.1	AIPR family protein [Pseudomonas aeruginosa]	NZ_RXUT01000102.1	8806	10614	+	7
		2108	PD-T4-6	PD-T4-6	WP_033976343.1	serine/threonine protein kinase [Pseudomonas aeruginosa]	NZ_RXUS01000001.1	756653	757642	+	723	9	64.29
			SoFic	SoFic	WP_003137352.1	Fic family protein [Pseudomonas]	NZ_RXUS01000003.1	78069	79190	+	78
			RosmerTA	RmrA	WP_162949573.1	XRE family transcriptional regulator [Pseudomonas aeruginosa]	NZ_RXUS01000010.1	118321	119445	-	107
			RosmerTA	RmrT	WP_121244224.1	hypothetical protein [Pseudomonas aeruginosa]	NZ_RXUS01000010.1	119505	120212	-	108
			CRISPR_array	CRISPR_array	CRISPR001	CRISPR001; repeat=GTTCACTGCCGTATAGGCAGCTAAGAAA; score=6.15	NZ_RXUS01000011.1	122493	123060	+	114.01
			PDC-S24	PDC-S24	WP_083557264.1	Fic family protein [Pseudomonas aeruginosa]	NZ_RXUS01000011.1	528274	529818	-	487
			PD-Lambda-5	PD-Lambda-5_B	WP_079383320.1	DNA adenine methylase [Pseudomonas aeruginosa]	NZ_RXUS01000013.1	384848	385729	-	375
			PD-Lambda-5	PD-Lambda-5_A	WP_079383321.1	ParB/Srx family N-terminal domain-containing protein [Pseudomonas aeruginosa]	NZ_RXUS01000013.1	385798	387231	-	376
			CRISPR_array	CRISPR_array	CRISPR002	CRISPR002; repeat=GTTCACTGCCGTGTAGGCAGCTAAGAAA; score=5.81	NZ_RXUS01000015.1	189841	190048	-	174.01
			RM_type_HNH	HNH	WP_124138617.1	HNH endonuclease [Pseudomonas aeruginosa]	NZ_RXUS01000020.1	120741	121538	+	109
			DMS_other	SspB	WP_126862262.1	DUF4007 family protein [Pseudomonas aeruginosa]	NZ_RXUS01000023.1	53631	54554	+	49
			DMS_other	SspD	WP_126862255.1	phosphoadenosine phosphosulfate reductase family protein [Pseudomonas aeruginosa]	NZ_RXUS01000023.1	57869	58711	+	51
			PT_SspFGH	SspH	WP_126862258.1	DNA translocase FtsK [Pseudomonas aeruginosa]	NZ_RXUS01000023.1	60195	65654	-	54
			PT_SspFGH	SspG	WP_126862259.1	hypothetical protein [Pseudomonas aeruginosa]	NZ_RXUS01000023.1	65648	67201	-	55
			PT_SspFGH	SspF	WP_126862260.1	hypothetical protein [Pseudomonas aeruginosa]	NZ_RXUS01000023.1	67198	69273	-	56
			CRISPR_array	CRISPR_array	CRISPR003	CRISPR003; repeat=GTTCACTGCCGTGTAGGCAGCTAAGAAA; score=6.14	NZ_RXUS01000029.1	97027	97594	+	95.01
			PDC-M01	PDC-M01B	WP_126862398.1	HNH endonuclease [Pseudomonas aeruginosa]	NZ_RXUS01000035.1	38847	39659	-	31
			PDC-M01	PDC-M01A	WP_185900572.1	AAA family ATPase [Pseudomonas aeruginosa]	NZ_RXUS01000035.1	39661	41301	-	32
		2144	ietAS	IetA	WP_071536761.1	AAA family ATPase [Pseudomonas aeruginosa]	NZ_RXUR01000002.1	43833	44837	+	39	19	30
			ietAS	IetS	WP_159426440.1	S8 family peptidase [Pseudomonas aeruginosa]	NZ_RXUR01000002.1	45048	47447	+	40
			SoFic	SoFic	WP_016852405.1	Fic family protein [Pseudomonas]	NZ_RXUR01000004.1	329550	330671	-	316
			PD-T4-6	PD-T4-6	WP_003097784.1	serine/threonine protein kinase [Pseudomonas]	NZ_RXUR01000012.1	129206	130195	-	140
			AbiE	AbiEii	WP_019486756.1	nucleotidyl transferase AbiEii/AbiGii toxin family protein [Proteobacteria]	NZ_RXUR01000035.1	104653	105573	-	100
			AbiE	AbiEi	WP_017462895.1	type IV toxin-antitoxin system AbiEi family antitoxin domain-containing protein [Proteobacteria]	NZ_RXUR01000035.1	105566	106324	-	101
			VSPR	MTase_II	WP_019484547.1	DNA cytosine methyltransferase [Proteobacteria]	NZ_RXUR01000035.1	126743	128362	+	124
			VSPR	Vsr	WP_009397211.1	very short patch repair endonuclease [Proteobacteria]	NZ_RXUR01000035.1	128359	128817	-	125
			mza	mzaB	WP_019484546.1	ATP-binding protein [Proteobacteria]	NZ_RXUR01000035.1	128953	130431	+	126
			mza	mzaC	WP_019484545.1	endonuclease [Proteobacteria]	NZ_RXUR01000035.1	130428	133088	+	127
			mza	mzaD	WP_049251259.1	PD-(D/E)XK motif protein [Pseudomonas]	NZ_RXUR01000035.1	133081	134046	+	128
			mza	mzaE	WP_019484543.1	AIPR family protein [Pseudomonas]	NZ_RXUR01000035.1	134046	136118	+	129
			PDC-S06	PDC-S06	WP_019484542.1	AAA family ATPase [Gammaproteobacteria]	NZ_RXUR01000035.1	136228	138855	+	130
			PDC-M30	PDC-M30B	WP_003111049.1	phage Gp37/Gp68 family protein [Pseudomonas]	NZ_RXUR01000048.1	3311	4054	+	4
			PDC-M30	PDC-M30A	WP_003111048.1	three-Cys-motif partner protein TcmP [Pseudomonas]	NZ_RXUR01000048.1	4076	5392	+	5
			SoFic	SoFic	WP_003161388.1	Fic family protein [Pseudomonas]	NZ_RXUR01000056.1	51673	52773	-	41
			PDC-S09	PDC-S09	WP_001247892.1	nucleotidyltransferase [Bacteria]	NZ_RXUR01000059.1	18929	19219	+	24
			PDC-M30	PDC-M30A	WP_126882750.1	three-Cys-motif partner protein TcmP [Pseudomonas aeruginosa]	NZ_RXUR01000059.1	23323	24636	-	32
			PDC-M30	PDC-M30B	WP_126882751.1	phage Gp37/Gp68 family protein [Pseudomonas aeruginosa]	NZ_RXUR01000059.1	24657	25400	-	33
			RM_type_I	Specificity_I	WP_071534480.1	restriction endonuclease subunit S [Pseudomonas]	NZ_RXUR01000064.1	16096	17295	-	11
			RM_type_I	MTase_I	WP_023124955.1	type I restriction-modification system subunit M [Pseudomonas]	NZ_RXUR01000064.1	17292	18875	-	12
			RM_type_I	REase_I	WP_031670418.1	DEAD/DEAH box helicase family protein [Pseudomonas]	NZ_RXUR01000064.1	18908	22291	-	13
			wadjet_type_I	JetD1	WP_023083528.1	DUF2220 family protein [Pseudomonas]	NZ_RXUR01000065.1	397	1554	-	1
			wadjet_type_I	JetC1	WP_023083529.1	AAA family ATPase [Pseudomonas]	NZ_RXUR01000065.1	1538	4843	-	2
			wadjet_type_I	JetB1	WP_023083530.1	DUF4194 domain-containing protein [Pseudomonas]	NZ_RXUR01000065.1	4840	5589	-	3
			wadjet_type_I	JetA1	WP_071534481.1	DUF3375 domain-containing protein [Pseudomonas]	NZ_RXUR01000065.1	5592	7091	-	4
			RM_type_I	REase_I	WP_016851951.1	DEAD/DEAH box helicase family protein [Pseudomonas]	NZ_RXUR01000069.1	12639	16019	+	13
			RM_type_I	MTase_I	WP_016851948.1	type I restriction-modification system subunit M [Pseudomonas]	NZ_RXUR01000069.1	18191	19774	+	15
			RM_type_I	Specificity_I	WP_016851947.1	restriction endonuclease subunit S [Pseudomonas]	NZ_RXUR01000069.1	19921	20958	+	16
			Mokosh_TypeI	MkoA	WP_023082743.1	AAA family ATPase [Pseudomonas]	NZ_RXUR01000069.1	28002	31394	+	23
			Mokosh_TypeI	MkoB	WP_003158575.1	hypothetical protein [Pseudomonas]	NZ_RXUR01000069.1	31378	32868	+	24
			cbass_type_III	TRIP13	WP_016852809.1	AAA family ATPase [Proteobacteria]	NZ_RXUR01000072.1	18763	19677	+	23
			cbass_type_III	HORMA	WP_003090160.1	hypothetical protein [Proteobacteria]	NZ_RXUR01000072.1	19674	20144	+	24
			cbass_type_III	HORMA	WP_003090159.1	hypothetical protein [Proteobacteria]	NZ_RXUR01000072.1	20141	20641	+	25
			cbass_type_III	Cyclase	WP_003090158.1	nucleotidyltransferase domain-containing protein [Proteobacteria]	NZ_RXUR01000072.1	20641	21543	+	26
			cbass_type_III	Effector	WP_003050273.1	cbass effector endonuclease NucC [Proteobacteria]	NZ_RXUR01000072.1	21582	22307	+	27
			ietAS	IetS	WP_058332120.1	S8 family peptidase [Pseudomonas aeruginosa]	NZ_RXUR01000082.1	6267	8690	-	8
			ietAS	IetA	WP_058332119.1	AAA family ATPase [Pseudomonas]	NZ_RXUR01000082.1	8715	9701	-	9
			RM_type_IIG	REase_MTase_IIG	pseudo_subWP_005740049.1	N-6 DNA methylase [Pseudomonas amygdali]	NZ_RXUR01000083.1	1	322	+	1
			RM_type_IIG	REase_MTase_IIG	WP_148113513.1	N-6 DNA methylase, partial [Pseudomonas aeruginosa]	NZ_RXUR01000088.1	1411	3866	+	4
		2444	RosmerTA	RmrT	WP_034037119.1	hypothetical protein [Pseudomonas aeruginosa]	NZ_RXUP01000003.1	162660	163322	+	141	28	24.29
			RosmerTA	RmrA	WP_034037121.1	helix-turn-helix domain-containing protein [Pseudomonas]	NZ_RXUP01000003.1	163341	164543	+	142
			CRISPR_array	CRISPR_array	CRISPR001	CRISPR001; repeat=GTGTTCCCCACGGGTGTGGGGATGAACCG; score=6.00	NZ_RXUP01000010.1	9959	10291	+	6.01
			cas_type_I-E	Cas3e	WP_023110809.1	CRISPR-associated helicase/endonuclease Cas3 [Pseudomonas]	NZ_RXUP01000010.1	11014	13686	+	7
			cas_type_I-E	Cas8e	WP_034037872.1	type I-E CRISPR-associated protein Cse1/CasA [Pseudomonas aeruginosa]	NZ_RXUP01000010.1	13689	15257	+	8
			cas_type_I-E	Cas11e	WP_003159829.1	type I-E CRISPR-associated protein Cse2/CasB [Pseudomonas aeruginosa]	NZ_RXUP01000010.1	15254	15784	+	9
			cas_type_I-E	Cas7e	WP_034037873.1	type I-E CRISPR-associated protein Cas7/Cse4/CasC [Pseudomonas aeruginosa]	NZ_RXUP01000010.1	15794	16936	+	10
			cas_type_I-E	Cas5e	WP_004348746.1	type I-E CRISPR-associated protein Cas5/CasD [Pseudomonas]	NZ_RXUP01000010.1	16938	17600	+	11
			cas_type_I-E	Cas6e	WP_004348749.1	type I-E CRISPR-associated protein Cas6/Cse3/CasE [Pseudomonas]	NZ_RXUP01000010.1	17575	18186	+	12
			cas_type_I-E	Cas1e	WP_031299144.1	type I-E CRISPR-associated endonuclease Cas1e [Pseudomonas aeruginosa]	NZ_RXUP01000010.1	18186	19103	+	13
			cas_type_I-E	Cas2e	WP_003159837.1	type I-E CRISPR-associated endoribonuclease Cas2 [Pseudomonas]	NZ_RXUP01000010.1	19100	19399	+	14
			CRISPR_array	CRISPR_array	CRISPR002	CRISPR002; repeat=GTGTTCCCCACATGCGTGGGGATGAACCG; score=6.22	NZ_RXUP01000010.1	19464	20224	+	14.02
			PD-T4-6	PD-T4-6	WP_003097784.1	serine/threonine protein kinase [Pseudomonas]	NZ_RXUP01000029.1	127754	128743	+	118
			PDC-S47	PDC-S47	WP_071567764.1	DUF4393 domain-containing protein [Pseudomonas aeruginosa]	NZ_RXUP01000050.1	56907	57698	-	47
			cbass_type_II	capP	WP_034037681.1	ImmA/IrrE family metallo-endopeptidase [Pseudomonas aeruginosa]	NZ_RXUP01000050.1	114968	115837	-	110
			cbass_type_II	capH	WP_034037680.1	helix-turn-helix domain-containing protein [Pseudomonas aeruginosa]	NZ_RXUP01000050.1	115840	116229	-	111
			PDC-S16	PDC-S16	WP_023093135.1	DUF2188 domain-containing protein [Proteobacteria]	NZ_RXUP01000050.1	116517	116741	+	112
			cbass_type_II	Effector	WP_010792148.1	patatin-like phospholipase family protein [Proteobacteria]	NZ_RXUP01000050.1	116748	117749	+	113
			cbass_type_II	Cyclase	WP_023094209.1	hypothetical protein [Pseudomonas]	NZ_RXUP01000050.1	117743	118885	+	114
			cbass_type_II	E1-E2	WP_034037679.1	ThiF family adenylyltransferase [Pseudomonas aeruginosa]	NZ_RXUP01000050.1	118882	120513	+	115
			cbass_type_II	JAB	WP_071567778.1	Mov34/MPN/PAD-1 family protein [Pseudomonas aeruginosa]	NZ_RXUP01000050.1	120501	120977	+	116
			mza	mzaE	WP_034037677.1	AIPR family protein [Pseudomonas]	NZ_RXUP01000050.1	121062	123134	-	117
			mza	mzaD	WP_034037675.1	PD-(D/E)XK motif protein [Pseudomonas aeruginosa]	NZ_RXUP01000050.1	123134	124099	-	118
			mza	mzaC	WP_034037673.1	endonuclease [Pseudomonas aeruginosa]	NZ_RXUP01000050.1	124092	126752	-	119
			mza	mzaB	WP_034037671.1	ATP-binding protein [Pseudomonas aeruginosa]	NZ_RXUP01000050.1	126749	128227	-	120
			VSPR	Vsr	WP_124074594.1	very short patch repair endonuclease [Gammaproteobacteria]	NZ_RXUP01000050.1	128363	128821	+	121
			VSPR	MTase_II	WP_034037669.1	DNA cytosine methyltransferase [Gammaproteobacteria]	NZ_RXUP01000050.1	128818	130437	-	122
			qatABCD	QatD	WP_034037640.1	TatD family hydrolase [Pseudomonas aeruginosa]	NZ_RXUP01000050.1	145371	146120	-	141
			qatABCD	QatC	WP_034037638.1	hypothetical protein [Pseudomonas aeruginosa]	NZ_RXUP01000050.1	146134	147501	-	142
			qatABCD	QatB	WP_202884169.1	hypothetical protein [Pseudomonas aeruginosa]	NZ_RXUP01000050.1	147498	148049	-	143
			qatABCD	QatA	WP_034037634.1	NTPase KAP [Pseudomonas aeruginosa]	NZ_RXUP01000050.1	148382	150325	-	144
			AbiE	AbiEi	WP_033986259.1	type IV toxin-antitoxin system AbiEi family antitoxin domain-containing protein [Pseudomonas aeruginosa]	NZ_RXUP01000050.1	151159	151917	+	146
			AbiE	AbiEii	WP_034037631.1	nucleotidyl transferase AbiEii/AbiGii toxin family protein [Pseudomonas aeruginosa]	NZ_RXUP01000050.1	151910	152830	+	147
			cbass_type_II	Effector	WP_034037831.1	SAVED domain-containing protein [Pseudomonas]	NZ_RXUP01000065.1	39683	40858	+	31
			cbass_type_II	Cyclase	WP_011979117.1	nucleotidyltransferase [Pseudomonas]	NZ_RXUP01000065.1	40858	42111	+	32
			cbass_type_II	E1-E2	WP_200903763.1	ThiF family adenylyltransferase [Pseudomonas]	NZ_RXUP01000065.1	42404	43879	+	33
			cbass_type_II	JAB	WP_023628724.1	Mov34/MPN/PAD-1 family protein [Pseudomonas]	NZ_RXUP01000065.1	43876	44367	+	34
			cbass_type_II	Effector	WP_031314431.1	3'-5' exonuclease [Pseudomonas]	NZ_RXUP01000065.1	44364	44912	-	35
			DRT_class_II	Drt9	WP_071567741.1	RNA-dependent DNA polymerase [Pseudomonas aeruginosa]	NZ_RXUP01000066.1	83	1579	-	1
			DMS_other	Specificity_I	WP_079386772.1	restriction endonuclease subunit S [Pseudomonas aeruginosa]	NZ_RXUP01000066.1	6738	8084	-	5
			DMS_other	MTase_I	WP_071567748.1	type I restriction-modification system subunit M [Pseudomonas aeruginosa]	NZ_RXUP01000066.1	8081	9682	-	6
			DMS_other	mad3	WP_003097265.1	DNA replication/repair protein RecF [Pseudomonas]	NZ_RXUP01000066.1	12748	13857	-	8
			darTG	DarG	WP_023119082.1	macro domain-containing protein [Pseudomonas aeruginosa]	NZ_RXUP01000072.1	47078	48205	-	45
			darTG	DarT	WP_071567761.1	DUF4433 domain-containing protein [Pseudomonas aeruginosa]	NZ_RXUP01000072.1	48211	48807	-	46
			SoFic	SoFic	WP_034037783.1	Fic family protein [Pseudomonas aeruginosa]	NZ_RXUP01000080.1	113759	114880	-	121
			DMS_other	WYL	WP_034014324.1	WYL domain-containing protein [Pseudomonas aeruginosa]	NZ_RXUP01000095.1	7502	8377	-	7
			RM_type_I	MTase_I	WP_023101154.1	type I restriction-modification system subunit M [Pseudomonas aeruginosa]	NZ_RXUP01000095.1	9410	11344	+	9
			RM_type_I	Specificity_I	WP_071580264.1	restriction endonuclease subunit S [Pseudomonas aeruginosa]	NZ_RXUP01000095.1	11334	12611	+	10
			DMS_other	mad3	WP_023101156.1	AAA family ATPase [Pseudomonas aeruginosa]	NZ_RXUP01000095.1	12704	13888	+	11
			HEC-01	HEC-01B	WP_023101156.1	AAA family ATPase [Pseudomonas aeruginosa]	NZ_RXUP01000095.1	12704	13888	+	11
			HEC-01	HEC-01A	WP_196493981.1	hypothetical protein [Pseudomonas aeruginosa]	NZ_RXUP01000095.1	13927	14481	+	12
			RM_type_I	REase_I	WP_023101158.1	type I restriction endonuclease subunit R [Pseudomonas aeruginosa]	NZ_RXUP01000095.1	14738	17839	+	13
			zorya_other	ZorB	WP_023436171.1	OmpA family protein [Pseudomonas aeruginosa]	NZ_RXUP01000095.1	40230	40925	-	42
			zorya_other	ZorA	WP_050157610.1	hypothetical protein [Pseudomonas aeruginosa]	NZ_RXUP01000095.1	40927	42633	-	43
			HEC-05	HEC-05	WP_023098849.1	DUF262 domain-containing protein [Proteobacteria]	NZ_RXUP01000122.1	21477	23192	-	19
			SoFic	SoFic	WP_023098843.1	Fic family protein [Proteobacteria]	NZ_RXUP01000122.1	39048	40148	-	26
			CRISPR_array	CRISPR_array	CRISPR003	CRISPR003; repeat=GTTCACTGCCGTATAGGCAGCTAAGAAA; score=6.20	NZ_RXUP01000138.1	34041	35636	+	21.01
			cas_type_I-F1	Cas6f	WP_033937163.1	type I-F CRISPR-associated endoribonuclease Cas6/Csy4 [Pseudomonas aeruginosa]	NZ_RXUP01000138.1	35760	36323	-	22
			cas_type_I-F1	Cas7f	WP_034038168.1	type I-F CRISPR-associated protein Csy3 [Pseudomonas aeruginosa]	NZ_RXUP01000138.1	36327	37355	-	23
			cas_type_I-F1	Cas5f	WP_003116910.1	type I-F CRISPR-associated protein Csy2 [Pseudomonas]	NZ_RXUP01000138.1	37366	38349	-	24
			cas_type_I-F1	Cas8f	WP_014602882.1	type I-F CRISPR-associated protein Csy1 [Pseudomonas aeruginosa]	NZ_RXUP01000138.1	38336	39640	-	25
			cas_type_I-F1	Cas23f	WP_034038169.1	type I-F CRISPR-associated helicase Cas3f [Pseudomonas aeruginosa]	NZ_RXUP01000138.1	39698	42928	-	26
			cas_type_I-F1	Cas1f	WP_003162915.1	type I-F CRISPR-associated endonuclease Cas1f [Pseudomonas aeruginosa]	NZ_RXUP01000138.1	42925	43899	-	27
			CRISPR_array	CRISPR_array	CRISPR004	CRISPR004; repeat=GTTCACTGCCGTGTAGGCAGCTAAGAAA; score=6.26	NZ_RXUP01000138.1	44160	45267	-	27.02
			RM_type_I	REase_I	WP_023109450.1	DEAD/DEAH box helicase family protein [Pseudomonas]	NZ_RXUP01000139.1	20435	23623	-	22
			RM_type_I	Specificity_I	WP_023109451.1	restriction endonuclease subunit S [Pseudomonas]	NZ_RXUP01000139.1	23624	24991	-	23
			RM_type_I	MTase_I	WP_034038259.1	type I restriction-modification system subunit M [Pseudomonas aeruginosa]	NZ_RXUP01000139.1	24988	26964	-	24
			PDC-M30	PDC-M30A	pseudo_subWP_003131866.1	three-Cys-motif partner protein TcmP [Pseudomonas]	NZ_RXUP01000143.1	7376	8691	-	7
			PDC-M30	PDC-M30B	WP_034038247.1	phage Gp37/Gp68 family protein [Pseudomonas aeruginosa]	NZ_RXUP01000143.1	8713	9456	-	8
			gabija	GajA	WP_023128893.1	AAA family ATPase [Pseudomonas aeruginosa]	NZ_RXUP01000147.1	38938	40542	+	37
			gabija	GajB	WP_023128894.1	UvrD-helicase domain-containing protein [Pseudomonas aeruginosa]	NZ_RXUP01000147.1	40535	41602	+	38
			argonaute_type_III	PprPIWI	WP_071567784.1	RNaseH domain-containing protein [Pseudomonas aeruginosa]	NZ_RXUP01000168.1	811	3162	-	2
			argonaute_type_III	PprDinG	WP_023518369.1	hypothetical protein [Pseudomonas aeruginosa]	NZ_RXUP01000168.1	3159	6233	-	3
			argonaute_type_III	PprRE	WP_024928871.1	hypothetical protein [Pseudomonas]	NZ_RXUP01000168.1	6217	7257	-	4
			wadjet_type_I	JetA1	WP_071534647.1	DUF3375 domain-containing protein [Pseudomonas]	NZ_RXUP01000173.1	3660	5159	+	6
			wadjet_type_I	JetB1	WP_175425925.1	DUF4194 domain-containing protein [Pseudomonas aeruginosa]	NZ_RXUP01000173.1	5162	5911	+	7
			wadjet_type_I	JetC1	WP_003159609.1	ATP synthase [Pseudomonas aeruginosa]	NZ_RXUP01000173.1	5908	9213	+	8
			wadjet_type_I	JetD1	pseudo_subWP_016253796.1	hypothetical protein [Pseudomonas aeruginosa]	NZ_RXUP01000173.1	9197	9812	+	9
			GAO_19	HerA	WP_079456428.1	ATP-binding protein [Pseudomonas aeruginosa]	NZ_RXUP01000175.1	2696	4600	-	6
			GAO_19	SIR2	WP_126632916.1	SIR2 family protein, partial [Pseudomonas aeruginosa]	NZ_RXUP01000175.1	4581	5296	-	7
		3587	DRT_class_III	RT_UG5-nitrilase	WP_016253322.1	hypothetical protein [Pseudomonas]	NZ_RXUU01000006.1	901	3948	+	2	13	76.74
			PDC-S02	PDC-S02	WP_010791767.1	restriction endonuclease [Pseudomonas]	NZ_RXUU01000006.1	4318	5310	-	4
			septu_type_I	PtuB1	WP_010791768.1	hypothetical protein [Pseudomonas]	NZ_RXUU01000006.1	5373	6251	-	5
			DMS_other	mad3	WP_003120662.1	AAA family ATPase [Pseudomonas]	NZ_RXUU01000006.1	6248	7999	-	6
			septu_type_I	PtuA1	WP_003120662.1	AAA family ATPase [Pseudomonas]	NZ_RXUU01000006.1	6248	7999	-	6
			RM_type_I	Specificity_I	WP_003120661.1	restriction endonuclease subunit S [Pseudomonas]	NZ_RXUU01000006.1	8001	9977	-	7
			RM_type_I	MTase_I	WP_003124483.1	type I restriction-modification system subunit M [Pseudomonas]	NZ_RXUU01000006.1	9977	11755	-	8
			RM_type_I	REase_I	WP_010791769.1	DEAD/DEAH box helicase family protein [Pseudomonas]	NZ_RXUU01000006.1	11791	14226	-	9
			cbass_type_III	Effector	WP_003050273.1	cbass effector endonuclease NucC [Proteobacteria]	NZ_RXUU01000008.1	45476	46201	-	53
			cbass_type_III	Cyclase	WP_003105624.1	nucleotidyltransferase domain-containing protein [Proteobacteria]	NZ_RXUU01000008.1	46240	47142	-	54
			cbass_type_III	HORMA	WP_003090159.1	hypothetical protein [Proteobacteria]	NZ_RXUU01000008.1	47142	47642	-	55
			cbass_type_III	HORMA	WP_003105626.1	hypothetical protein [Proteobacteria]	NZ_RXUU01000008.1	47639	48109	-	56
			cbass_type_III	TRIP13	WP_003105629.1	AAA family ATPase [Proteobacteria]	NZ_RXUU01000008.1	48106	49020	-	57
			GAO_19	SIR2	WP_057094673.1	SIR2 family protein [Pseudomonas aeruginosa]	NZ_RXUU01000018.1	4569	5633	+	6
			GAO_19	HerA	WP_057092201.1	ATP-binding protein [Gammaproteobacteria]	NZ_RXUU01000018.1	5614	7515	+	7
			DUF4238	DUF4238-Pers	WP_023084894.1	DUF4238 domain-containing protein [Pseudomonas]	NZ_RXUU01000034.1	59078	60010	-	49
			PDC-S02	PDC-S02	WP_020750775.1	PDDEXK nuclease domain-containing protein [Proteobacteria]	NZ_RXUU01000042.1	25022	26086	+	26
			PD-T4-6	PD-T4-6	WP_003097784.1	serine/threonine protein kinase [Pseudomonas]	NZ_RXUU01000047.1	107076	108065	+	97
			PD-T4-7	PD-T4-7	WP_023093038.1	hypothetical protein [Pseudomonas aeruginosa]	NZ_RXUU01000067.1	1961	2818	+	3
			SoFic	SoFic	WP_023085670.1	Fic family protein [Pseudomonas]	NZ_RXUU01000072.1	139814	140935	-	142
			cbass_type_I	Effector	WP_071536478.1	SLATT domain-containing protein [Pseudomonas]	NZ_RXUU01000130.1	1660	2250	+	4
			cbass_type_I	Cyclase	WP_023094906.1	nucleotidyltransferase [Pseudomonas]	NZ_RXUU01000130.1	2247	3512	+	5
		3705	Lamassu_other	LmuB	WP_079989813.1	hypothetical protein [Pseudomonas aeruginosa]	NZ_RXUB01000011.1	26206	27282	-	41	12	47.14
			Lamassu_other	LmuC	WP_126632672.1	hypothetical protein [Pseudomonas aeruginosa]	NZ_RXUB01000011.1	27986	28471	-	42
			Lamassu_other	LmuB	pseudo_subWP_003431104.1	dsDNA nuclease domain-containing protein [Pseudomonas syringae]	NZ_RXUB01000011.1	28468	29630	-	43
			PD-T4-6	PD-T4-6	WP_033997280.1	serine/threonine protein kinase [Pseudomonas aeruginosa]	NZ_RXUB01000026.1	126106	127095	+	117
			PDC-S02	PDC-S02	WP_020750775.1	PDDEXK nuclease domain-containing protein [Proteobacteria]	NZ_RXUB01000027.1	14431	15495	+	12
			gabija	GajA	WP_058129924.1	ATP-dependent endonuclease [Pseudomonas aeruginosa]	NZ_RXUB01000028.1	33737	36070	+	37
			gabija	GajB	WP_058129923.1	ATP-dependent helicase [Pseudomonas aeruginosa]	NZ_RXUB01000028.1	36067	37944	+	38
			RM_type_HNH	HNH	WP_034081660.1	HNH endonuclease [Pseudomonas aeruginosa]	NZ_RXUB01000059.1	23366	24154	+	22
			Mokosh_TypeI	MkoA	WP_033990969.1	DUF2075 domain-containing protein [Pseudomonas aeruginosa]	NZ_RXUB01000069.1	6780	10415	+	6
			Mokosh_TypeI	MkoB	WP_048512748.1	phospholipase D-like domain-containing protein [Pseudomonas aeruginosa]	NZ_RXUB01000069.1	10458	12296	+	7
			PDC-M30	PDC-M30A	WP_003117070.1	three-Cys-motif partner protein TcmP [Pseudomonas]	NZ_RXUB01000077.1	28354	29688	-	35
			PDC-M30	PDC-M30B	WP_003117069.1	phage Gp37/Gp68 family protein [Pseudomonas]	NZ_RXUB01000077.1	29706	30449	-	36
			PDC-M30	PDC-M30A	WP_003117068.1	three-Cys-motif partner protein TcmP [Pseudomonas aeruginosa]	NZ_RXUB01000077.1	30682	31872	-	37
			CRISPR_array	CRISPR_array	CRISPR001	CRISPR001; repeat=GTTCACTGCCGTATAGGCAGCTAAGAAA; score=6.24	NZ_RXUB01000080.1	54415	54922	-	46.01
			CRISPR_array	CRISPR_array	CRISPR002	CRISPR002; repeat=GTTCACTGCCGTGTAGGCAGCTAAGAAA; score=5.81	NZ_RXUB01000089.1	2878	3086	+	2.01
			CRISPR_array	CRISPR_array	CRISPR003	CRISPR003; repeat=GTTCACTGCCGTATAGGCAGCTAAGAAA; score=6.23	NZ_RXUB01000110.1	21519	21846	-	22.01
			ietAS	IetA	WP_033989010.1	AAA family ATPase [Proteobacteria]	NZ_RXUB01000116.1	22283	23266	+	23
			ietAS	IetS	WP_058129606.1	S8 family peptidase [Proteobacteria]	NZ_RXUB01000116.1	23276	25765	+	24
			RM_type_IIG	REase_MTase_IIG	WP_033989003.1	class I SAM-dependent DNA methyltransferase [Proteobacteria]	NZ_RXUB01000116.1	31503	34277	-	30
			DMS_other	mad1	WP_071549122.1	helix-turn-helix domain-containing protein [Proteobacteria]	NZ_RXUB01000136.1	31308	31517	+	26
			RM_type_I	REase_I	WP_058129598.1	type I restriction endonuclease subunit R [Pseudomonas aeruginosa]	NZ_RXUB01000136.1	31585	34557	+	27
			RM_type_I	Specificity_I	WP_071549123.1	restriction endonuclease subunit S [Pseudomonas aeruginosa]	NZ_RXUB01000136.1	34823	36094	+	29
			PrrC	PrrC	WP_058129600.1	AAA family ATPase [Pseudomonas aeruginosa]	NZ_RXUB01000136.1	36091	37221	+	30
			RM_type_I	MTase_I	WP_058129601.1	type I restriction-modification system subunit M [Pseudomonas aeruginosa]	NZ_RXUB01000136.1	37218	38828	+	31
		4841	PD-T4-6	PD-T4-6	WP_003087629.1	serine/threonine protein kinase [Pseudomonas]	NZ_RXTT01000010.1	20403	21392	+	17	13	48.57
			HEC-05	HEC-05	WP_023098849.1	DUF262 domain-containing protein [Proteobacteria]	NZ_RXTT01000024.1	21707	23422	-	20
			SoFic	SoFic	WP_023098843.1	Fic family protein [Proteobacteria]	NZ_RXTT01000024.1	39278	40378	-	27
			PDC-M30	PDC-M30A	WP_004352835.1	three-Cys-motif partner protein TcmP [Pseudomonas]	NZ_RXTT01000031.1	17941	19194	-	22
			PDC-M30	PDC-M30B	WP_004352836.1	phage Gp37/Gp68 family protein [Pseudomonas]	NZ_RXTT01000031.1	19227	20009	-	23
			SoFic	SoFic	WP_003085005.1	Fic family protein [Pseudomonas]	NZ_RXTT01000033.1	92457	93578	-	103
			druantia_type_II	DruE2	WP_003089206.1	DEAD/DEAH box helicase [Pseudomonas]	NZ_RXTT01000043.1	72566	78406	-	67
			druantia_type_II	DruG2	WP_169309831.1	hypothetical protein [Pseudomonas]	NZ_RXTT01000043.1	78420	80504	-	68
			druantia_type_II	DruF2	WP_003089200.1	hypothetical protein [Pseudomonas]	NZ_RXTT01000043.1	80569	83121	-	69
			druantia_type_II	DruM2	WP_042113812.1	DNA (cytosine-5-)-methyltransferase [Pseudomonas]	NZ_RXTT01000043.1	83118	84302	-	70
			VSPR	MTase_II	WP_042113812.1	DNA (cytosine-5-)-methyltransferase [Pseudomonas]	NZ_RXTT01000043.1	83118	84302	-	70
			VSPR	Vsr	WP_042115191.1	DNA mismatch endonuclease Vsr [Pseudomonas]	NZ_RXTT01000043.1	84416	84787	+	71
			PDC-S14	PDC-S14	WP_196678509.1	GIY-YIG nuclease family protein [Pseudomonas]	NZ_RXTT01000049.1	1093	1782	-	3
			PDC-S09	PDC-S09	WP_001247892.1	nucleotidyltransferase [Bacteria]	NZ_RXTT01000050.1	55158	55448	-	64
			RM_type_I	REase_I	WP_003090627.1	type I restriction endonuclease subunit R [Pseudomonas]	NZ_RXTT01000057.1	249	3242	-	1
			RM_type_I	Specificity_I	WP_014603864.1	restriction endonuclease subunit S [Pseudomonas]	NZ_RXTT01000057.1	3247	4398	-	2
			gabija	GajB	WP_003090631.1	ATP-dependent helicase [Pseudomonas]	NZ_RXTT01000057.1	4395	6071	-	3
			gabija	GajA	WP_014603865.1	AAA family ATPase [Pseudomonas]	NZ_RXTT01000057.1	6068	7972	-	4
			RM_type_I	MTase_I	WP_014603866.1	type I restriction-modification system subunit M [Pseudomonas]	NZ_RXTT01000057.1	7969	9492	-	5
			RM_type_I	MTase_I	WP_014603867.1	type I restriction-modification system subunit M [Pseudomonas]	NZ_RXTT01000057.1	9489	10985	-	6
			PsyrTA	PsyrA	WP_014603868.1	DNA-processing protein DprA [Pseudomonas]	NZ_RXTT01000057.1	11056	12435	-	7
			PsyrTA	PsyrT	WP_023098559.1	RecQ family ATP-dependent DNA helicase [Pseudomonas]	NZ_RXTT01000057.1	12432	14510	-	8
			GAO_19	HerA	pseudo_subWP_009315590.1	ATP-binding protein [Pseudomonas]	NZ_RXTT01000061.1	7129	8855	-	8
			GAO_19	SIR2	WP_023083791.1	SIR2 family protein [Pseudomonas aeruginosa]	NZ_RXTT01000061.1	8866	9879	-	9
		5498	cbass_type_I	Cyclase	WP_079394446.1	nucleotidyltransferase [Pseudomonas aeruginosa]	NZ_RXTS01000001.1	580596	581471	+	529	20	22.86
			cbass_type_I	Effector	WP_079394447.1	hypothetical protein [Pseudomonas aeruginosa]	NZ_RXTS01000001.1	581471	582133	+	530
			cbass_type_I	Effector	WP_124138705.1	hypothetical protein [Pseudomonas aeruginosa]	NZ_RXTS01000001.1	582423	583049	+	531
			brex_type_I	BrxL	WP_124138802.1	protease Lon-related BREX system protein BrxL [Pseudomonas aeruginosa]	NZ_RXTS01000003.1	551868	553907	-	495
			brex_type_I	PglZ	WP_124138803.1	BREX-1 system phosphatase PglZ type A [Pseudomonas aeruginosa]	NZ_RXTS01000003.1	553922	556549	-	496
			dynamins	LeoA	WP_124138804.1	50S ribosome-binding GTPase [Pseudomonas aeruginosa]	NZ_RXTS01000003.1	556606	558315	-	497
			dynamins	LeoBC	WP_124138805.1	50S ribosome-binding GTPase [Pseudomonas aeruginosa]	NZ_RXTS01000003.1	558325	560421	-	498
			brex_type_I	PglX	WP_124138806.1	BREX-1 system adenine-specific DNA-methyltransferase PglX [Pseudomonas aeruginosa]	NZ_RXTS01000003.1	560426	562171	-	499
			DRT_class_III	RT_UG5-nitrilase	pseudo_subWP_013983394.1	RNA-directed DNA polymerase [Pseudomonas stutzeri]	NZ_RXTS01000003.1	562168	562401	-	500
			GAO_19	HerA	WP_124138807.1	ATP-binding protein [Pseudomonas aeruginosa]	NZ_RXTS01000003.1	562409	564547	-	501
			DMS_other	mad8	WP_124138807.1	ATP-binding protein [Pseudomonas aeruginosa]	NZ_RXTS01000003.1	562409	564547	-	501
			GAO_19	SIR2	WP_124138808.1	SIR2 family protein [Pseudomonas aeruginosa]	NZ_RXTS01000003.1	564544	565923	-	502
			brex_type_I	PglX	WP_124138809.1	BREX-1 system adenine-specific DNA-methyltransferase PglX [Pseudomonas aeruginosa]	NZ_RXTS01000003.1	566020	567954	-	503
			brex_type_I	BrxC	WP_124138810.1	BREX system P-loop protein BrxC [Pseudomonas aeruginosa]	NZ_RXTS01000003.1	568039	571710	-	504
			brex_type_I	BrxB	WP_124138811.1	DUF1788 domain-containing protein [Pseudomonas aeruginosa]	NZ_RXTS01000003.1	571729	572304	-	505
			brex_type_I	BrxA	WP_124138812.1	DUF1819 family protein [Pseudomonas aeruginosa]	NZ_RXTS01000003.1	572327	572944	-	506
			DMS_other	WYL	WP_124138813.1	WYL domain-containing protein [Pseudomonas aeruginosa]	NZ_RXTS01000003.1	572941	573810	-	507
			PDC-M30	PDC-M30A	WP_003117070.1	three-Cys-motif partner protein TcmP [Pseudomonas]	NZ_RXTS01000006.1	133963	135297	-	125
			PDC-M30	PDC-M30B	WP_003117069.1	phage Gp37/Gp68 family protein [Pseudomonas]	NZ_RXTS01000006.1	135315	136058	-	126
			PDC-M30	PDC-M30A	WP_003117068.1	three-Cys-motif partner protein TcmP [Pseudomonas aeruginosa]	NZ_RXTS01000006.1	136291	137481	-	127
			CRISPR_array	CRISPR_array	CRISPR001	CRISPR001; repeat=GTGTTCCCCACATGCGTGGGGATGAACCG; score=6.23	NZ_RXTS01000009.1	141371	142254	-	134.01
			cas_type_I-E	Cas2e	WP_003159837.1	type I-E CRISPR-associated endoribonuclease Cas2 [Pseudomonas]	NZ_RXTS01000009.1	142319	142618	-	135
			cas_type_I-E	Cas1e	WP_170954480.1	type I-E CRISPR-associated endonuclease Cas1e [Pseudomonas aeruginosa]	NZ_RXTS01000009.1	142615	143532	-	136
			cas_type_I-E	Cas6e	WP_004348749.1	type I-E CRISPR-associated protein Cas6/Cse3/CasE [Pseudomonas]	NZ_RXTS01000009.1	143532	144143	-	137
			cas_type_I-E	Cas5e	WP_004348746.1	type I-E CRISPR-associated protein Cas5/CasD [Pseudomonas]	NZ_RXTS01000009.1	144118	144780	-	138
			cas_type_I-E	Cas7e	WP_003159830.1	type I-E CRISPR-associated protein Cas7/Cse4/CasC [Pseudomonas aeruginosa]	NZ_RXTS01000009.1	144782	145924	-	139
			cas_type_I-E	Cas11e	WP_023106945.1	type I-E CRISPR-associated protein Cse2/CasB [Pseudomonas]	NZ_RXTS01000009.1	145934	146464	-	140
			cas_type_I-E	Cas8e	WP_033942526.1	type I-E CRISPR-associated protein Cse1/CasA [Pseudomonas aeruginosa]	NZ_RXTS01000009.1	146461	148029	-	141
			cas_type_I-E	Cas3e	WP_023084480.1	CRISPR-associated helicase/endonuclease Cas3 [Pseudomonas aeruginosa]	NZ_RXTS01000009.1	148032	150704	-	142
			CRISPR_array	CRISPR_array	CRISPR002	CRISPR002; repeat=GTGTTCCCCACGGGTGTGGGGATGAACCG; score=6.11	NZ_RXTS01000009.1	151426	152003	-	142.02
			Lamassu_Family	LmuB	WP_023518320.1	DUF3732 domain-containing protein [Pseudomonas]	NZ_RXTS01000012.1	327839	329866	-	314
			Lamassu_Family	LmuC	WP_071533922.1	DUF6521 family protein [Pseudomonas]	NZ_RXTS01000012.1	329863	330327	-	315
			Lamassu_Family	LmuA	WP_071533923.1	hypothetical protein [Pseudomonas]	NZ_RXTS01000012.1	330324	331451	-	316
			SoFic	SoFic	WP_023518322.1	Fic family protein [Pseudomonas]	NZ_RXTS01000012.1	332467	333588	-	318
			VSPR	Vsr	WP_003451864.1	DNA mismatch endonuclease Vsr [Pseudomonas]	NZ_RXTS01000014.1	1423	1872	-	3
			VSPR	MTase_II	WP_031628281.1	DNA cytosine methyltransferase [Pseudomonas]	NZ_RXTS01000014.1	1902	3500	+	4
			mza	mzaB	WP_031655762.1	ATP-binding protein [Pseudomonas]	NZ_RXTS01000014.1	3577	5019	+	5
			mza	mzaC	WP_010793100.1	Z1 domain-containing protein [Pseudomonas]	NZ_RXTS01000014.1	5033	7876	+	6
			mza	mzaD	WP_010793101.1	PD-(D/E)XK motif protein [Pseudomonas]	NZ_RXTS01000014.1	7860	8876	+	7
			mza	mzaE	WP_003451876.1	AIPR family protein [Pseudomonas]	NZ_RXTS01000014.1	8876	10684	+	8
			DMS_other	DrmB	WP_023124488.1	DUF1998 domain-containing protein [Pseudomonas aeruginosa]	NZ_RXTS01000015.1	1780	3639	-	2
			DMS_other	DrmA	WP_010793107.1	hypothetical protein [Pseudomonas]	NZ_RXTS01000015.1	3629	6820	-	3
			menshen	NsnC	WP_124138777.1	hypothetical protein [Pseudomonas aeruginosa]	NZ_RXTS01000016.1	171974	172927	-	162
			menshen	NsnB	WP_162949876.1	DUF3696 domain-containing protein [Pseudomonas aeruginosa]	NZ_RXTS01000016.1	172929	174059	-	163
			menshen	NsnA	WP_162949875.1	DUF262 domain-containing protein [Pseudomonas aeruginosa]	NZ_RXTS01000016.1	174043	175152	-	164
			PDC-S31	PDC-S31	WP_023124085.1	DUF2971 domain-containing protein [Pseudomonas]	NZ_RXTS01000022.1	178568	179317	-	163
			Lamassu_Family	LmuB	WP_023124087.1	DUF3732 domain-containing protein [Pseudomonas]	NZ_RXTS01000022.1	180455	182410	-	165
			Lamassu_Family	LmuC	WP_023124088.1	DUF6521 family protein [Pseudomonas]	NZ_RXTS01000022.1	182407	182895	-	166
			Lamassu_Family	LmuA	WP_023124089.1	hypothetical protein [Pseudomonas]	NZ_RXTS01000022.1	182892	184115	-	167
			PD-T4-6	PD-T4-6	WP_003097784.1	serine/threonine protein kinase [Pseudomonas]	NZ_RXTS01000023.1	178548	179537	+	164
			septu_type_I	PtuA1	WP_034022253.1	AAA family ATPase [Pseudomonas aeruginosa]	NZ_RXTS01000026.1	143575	144873	+	133
			septu_type_I	PtuB1	WP_124138721.1	hypothetical protein [Pseudomonas aeruginosa]	NZ_RXTS01000026.1	144877	145614	+	134
			gabija	GajB	WP_124138917.1	ATP-dependent helicase [Pseudomonas aeruginosa]	NZ_RXTS01000035.1	39003	40784	-	33
			gabija	GajA	WP_033985018.1	AAA family ATPase [Pseudomonas aeruginosa]	NZ_RXTS01000035.1	40777	42561	-	34
			PDC-M30	PDC-M30B	WP_003111049.1	phage Gp37/Gp68 family protein [Pseudomonas]	NZ_RXTS01000036.1	70140	70883	+	61
			PDC-M30	PDC-M30A	WP_003111048.1	three-Cys-motif partner protein TcmP [Pseudomonas]	NZ_RXTS01000036.1	70905	72221	+	62
		5508	PsyrTA	PsyrT	WP_023911543.1	RecQ family ATP-dependent DNA helicase [Pseudomonas aeruginosa]	NZ_RXTR01000026.1	25204	27282	+	39	11	25.71
			PsyrTA	PsyrA	WP_023911544.1	DNA-processing protein DprA [Pseudomonas aeruginosa]	NZ_RXTR01000026.1	27279	28658	+	40
			RM_type_I	MTase_I	WP_058007383.1	type I restriction-modification system subunit M [Pseudomonas aeruginosa]	NZ_RXTR01000026.1	28729	30225	+	41
			RM_type_I	MTase_I	WP_023911300.1	type I restriction-modification system subunit M [Pseudomonas aeruginosa]	NZ_RXTR01000026.1	30222	31745	+	42
			gabija	GajA	WP_023911301.1	AAA family ATPase [Pseudomonas aeruginosa]	NZ_RXTR01000026.1	31742	33646	+	43
			gabija	GajB	WP_023911302.1	ATP-dependent helicase [Pseudomonas aeruginosa]	NZ_RXTR01000026.1	33643	35316	+	44
			RM_type_I	Specificity_I	WP_023911304.1	restriction endonuclease subunit S [Pseudomonas aeruginosa]	NZ_RXTR01000026.1	35313	36467	+	45
			RM_type_I	REase_I	WP_023911305.1	type I restriction endonuclease subunit R [Pseudomonas aeruginosa]	NZ_RXTR01000026.1	36472	39465	+	46
			PDC-S70	PDC-S70	WP_071534517.1	hypothetical protein [Pseudomonas aeruginosa]	NZ_RXTR01000026.1	39591	40220	-	47
			PD-T4-6	PD-T4-6	WP_003097784.1	serine/threonine protein kinase [Pseudomonas]	NZ_RXTR01000029.1	72989	73978	+	66
			SoFic	SoFic	WP_003117952.1	Fic family protein [Pseudomonas]	NZ_RXTR01000037.1	105871	106992	-	116
			PD-Lambda-2	PD-Lambda-2_A	WP_003116393.1	type II toxin-antitoxin system HigB family toxin [Pseudomonas]	NZ_RXTR01000048.1	4368	4631	+	4
			PD-Lambda-2	PD-Lambda-2_B	WP_071534961.1	ImmA/IrrE family metallo-endopeptidase [Pseudomonas]	NZ_RXTR01000048.1	4637	5854	+	5
			PD-Lambda-2	PD-Lambda-2_C	WP_023115149.1	beta family protein [Pseudomonas]	NZ_RXTR01000048.1	5851	6984	+	6
			PD-T4-6	PD-T4-6	WP_079753643.1	serine/threonine protein kinase [Pseudomonas aeruginosa]	NZ_RXTR01000081.1	905	1945	-	2
			PD-T4-6	PD-T4-6	WP_071575162.1	serine/threonine protein kinase [Pseudomonas aeruginosa]	NZ_RXTR01000081.1	2020	3090	-	3
			argonaute_type_III	PprRE	WP_024928871.1	hypothetical protein [Pseudomonas]	NZ_RXTR01000089.1	147	1187	+	1
			argonaute_type_III	PprDinG	WP_003159613.1	hypothetical protein [Pseudomonas aeruginosa]	NZ_RXTR01000089.1	1171	4245	+	2
			argonaute_type_III	PprPIWI	WP_003159611.1	RNaseH domain-containing protein [Pseudomonas aeruginosa]	NZ_RXTR01000089.1	4242	6593	+	3
			wadjet_type_I	JetD1	WP_010792099.1	DUF2220 family protein [Pseudomonas]	NZ_RXTR01000089.1	6834	8015	-	4
			wadjet_type_I	JetC1	WP_023910672.1	ATP synthase [Pseudomonas aeruginosa]	NZ_RXTR01000089.1	7999	11304	-	5
			wadjet_type_I	JetB1	WP_003119440.1	DUF4194 domain-containing protein [Pseudomonas aeruginosa]	NZ_RXTR01000089.1	11301	12050	-	6
			wadjet_type_I	JetA1	WP_071535102.1	DUF3375 domain-containing protein [Pseudomonas aeruginosa]	NZ_RXTR01000089.1	12053	13552	-	7
			PD-Lambda-5	PD-Lambda-5_B	WP_071536658.1	DNA adenine methylase [Pseudomonas aeruginosa]	NZ_RXTR01000131.1	18732	19592	+	24
			PD-Lambda-5	PD-Lambda-5_A	WP_023129333.1	hypothetical protein [Pseudomonas aeruginosa]	NZ_RXTR01000131.1	19593	20840	-	25
		5519	SoFic	SoFic	WP_003085005.1	Fic family protein [Pseudomonas]	NZ_RXTQ01000006.1	77882	79003	+	79	16	21.34
			PDC-S14	PDC-S14	WP_196678509.1	GIY-YIG nuclease family protein [Pseudomonas]	NZ_RXTQ01000007.1	1093	1782	-	3
			PD-T4-6	PD-T4-6	WP_003087629.1	serine/threonine protein kinase [Pseudomonas]	NZ_RXTQ01000014.1	20403	21392	+	17
			PDC-S09	PDC-S09	WP_001247892.1	nucleotidyltransferase [Bacteria]	NZ_RXTQ01000029.1	11697	11987	+	11
			HEC-05	HEC-05	WP_023098849.1	DUF262 domain-containing protein [Proteobacteria]	NZ_RXTQ01000031.1	21818	23533	-	20
			SoFic	SoFic	WP_023098843.1	Fic family protein [Proteobacteria]	NZ_RXTQ01000031.1	39389	40489	-	27
			druantia_type_II	DruE2	WP_003089206.1	DEAD/DEAH box helicase [Pseudomonas]	NZ_RXTQ01000041.1	72566	78406	-	67
			druantia_type_II	DruG2	WP_169309831.1	hypothetical protein [Pseudomonas]	NZ_RXTQ01000041.1	78420	80504	-	68
			druantia_type_II	DruF2	WP_003089200.1	hypothetical protein [Pseudomonas]	NZ_RXTQ01000041.1	80569	83121	-	69
			druantia_type_II	DruM2	WP_042113812.1	DNA (cytosine-5-)-methyltransferase [Pseudomonas]	NZ_RXTQ01000041.1	83118	84302	-	70
			VSPR	MTase_II	WP_042113812.1	DNA (cytosine-5-)-methyltransferase [Pseudomonas]	NZ_RXTQ01000041.1	83118	84302	-	70
			VSPR	Vsr	WP_042115191.1	DNA mismatch endonuclease Vsr [Pseudomonas]	NZ_RXTQ01000041.1	84416	84787	+	71
			RM_type_III	REase_III	WP_003160810.1	DEAD/DEAH box helicase family protein [Proteobacteria]	NZ_RXTQ01000042.1	6972	9977	-	10
			RM_type_III	MTase_III	WP_003158913.1	site-specific DNA-methyltransferase [Proteobacteria]	NZ_RXTQ01000042.1	9990	12146	-	11
			HEC-06	HEC-06	WP_003158912.1	DUF262 domain-containing protein [Proteobacteria]	NZ_RXTQ01000042.1	12146	14269	-	12
			DMS_other	WYL	WP_003158909.1	WYL domain-containing protein [Proteobacteria]	NZ_RXTQ01000042.1	18316	19224	-	15
			ietAS	IetA	WP_003158906.1	AAA family ATPase [Proteobacteria]	NZ_RXTQ01000042.1	20839	21870	+	18
			ietAS	IetS	WP_003160813.1	S8 family peptidase [Gammaproteobacteria]	NZ_RXTQ01000042.1	21848	24358	+	19
			PsyrTA	PsyrT	WP_023098559.1	RecQ family ATP-dependent DNA helicase [Pseudomonas]	NZ_RXTQ01000046.1	32759	34837	+	40
			PsyrTA	PsyrA	WP_014603868.1	DNA-processing protein DprA [Pseudomonas]	NZ_RXTQ01000046.1	34834	36213	+	41
			RM_type_I	MTase_I	WP_014603867.1	type I restriction-modification system subunit M [Pseudomonas]	NZ_RXTQ01000046.1	36284	37780	+	42
			RM_type_I	MTase_I	WP_014603866.1	type I restriction-modification system subunit M [Pseudomonas]	NZ_RXTQ01000046.1	37777	39300	+	43
			gabija	GajA	WP_014603865.1	AAA family ATPase [Pseudomonas]	NZ_RXTQ01000046.1	39297	41201	+	44
			gabija	GajB	WP_003090631.1	ATP-dependent helicase [Pseudomonas]	NZ_RXTQ01000046.1	41198	42874	+	45
			RM_type_I	Specificity_I	WP_014603864.1	restriction endonuclease subunit S [Pseudomonas]	NZ_RXTQ01000046.1	42871	44022	+	46
			RM_type_I	REase_I	WP_003090627.1	type I restriction endonuclease subunit R [Pseudomonas]	NZ_RXTQ01000046.1	44027	47020	+	47
			PD-Lambda-5	PD-Lambda-5_A	WP_126441673.1	hypothetical protein [Pseudomonas aeruginosa]	NZ_RXTQ01000059.1	2246	3640	+	7
			PD-Lambda-5	PD-Lambda-5_B	WP_071567477.1	DNA adenine methylase [Pseudomonas aeruginosa]	NZ_RXTQ01000059.1	3642	4502	-	8
		5524	PDC-S06	PDC-S06	WP_019484542.1	AAA family ATPase [Gammaproteobacteria]	NZ_RXTO01000005.1	112136	114763	-	103	25	5.71
			mza	mzaE	WP_023101508.1	AIPR family protein [Proteobacteria]	NZ_RXTO01000005.1	114873	116945	-	104
			mza	mzaD	WP_019484544.1	PD-(D/E)XK motif protein [Proteobacteria]	NZ_RXTO01000005.1	116945	117910	-	105
			mza	mzaC	WP_019484545.1	endonuclease [Proteobacteria]	NZ_RXTO01000005.1	117903	120563	-	106
			mza	mzaB	WP_019484546.1	ATP-binding protein [Proteobacteria]	NZ_RXTO01000005.1	120560	122038	-	107
			VSPR	Vsr	WP_009397211.1	very short patch repair endonuclease [Proteobacteria]	NZ_RXTO01000005.1	122174	122632	+	108
			VSPR	MTase_II	WP_019484547.1	DNA cytosine methyltransferase [Proteobacteria]	NZ_RXTO01000005.1	122629	124248	-	109
			AbiE	AbiEi	WP_017462895.1	type IV toxin-antitoxin system AbiEi family antitoxin domain-containing protein [Proteobacteria]	NZ_RXTO01000005.1	144668	145426	+	132
			AbiE	AbiEii	WP_019486756.1	nucleotidyl transferase AbiEii/AbiGii toxin family protein [Proteobacteria]	NZ_RXTO01000005.1	145419	146339	+	133
			DMS_other	Control_protein	WP_003282197.1	helix-turn-helix domain-containing protein [Proteobacteria]	NZ_RXTO01000005.1	148404	148703	-	135
			DMS_other	Control_protein	WP_071037998.1	helix-turn-helix domain-containing protein [Proteobacteria]	NZ_RXTO01000005.1	152538	152843	+	139
			DMS_other	WYL	WP_126583668.1	WYL domain-containing protein [Pseudomonas aeruginosa]	NZ_RXTO01000005.1	154050	154964	+	141
			brex_type_III	BrxF	WP_126583669.1	BREX-3 system P-loop-containing protein BrxF [Pseudomonas]	NZ_RXTO01000005.1	154969	155442	+	142
			brex_type_III	BrxC	WP_221767937.1	DUF6079 family protein [Pseudomonas aeruginosa]	NZ_RXTO01000005.1	155478	159221	+	143
			GAO_19	SIR2	WP_125277463.1	SIR2 family protein [Proteobacteria]	NZ_RXTO01000005.1	161360	162454	+	145
			GAO_19	HerA	WP_125277462.1	ATP-binding protein [Proteobacteria]	NZ_RXTO01000005.1	162457	164196	+	146
			DMS_other	mad8	WP_125277462.1	ATP-binding protein [Proteobacteria]	NZ_RXTO01000005.1	162457	164196	+	146
			brex_type_III	PglXI	WP_126583710.1	DNA methylase [Pseudomonas aeruginosa]	NZ_RXTO01000005.1	164199	166970	+	147
			brex_type_III	BrxHII	WP_126583671.1	DEAD/DEAH box helicase family protein [Pseudomonas aeruginosa]	NZ_RXTO01000005.1	167278	170163	+	149
			brex_type_III	PglZ	WP_126583672.1	BREX-3 system phosphatase PglZ [Pseudomonas aeruginosa]	NZ_RXTO01000005.1	170160	172190	+	150
			brex_type_III	BrxA	WP_126583673.1	hypothetical protein [Pseudomonas aeruginosa]	NZ_RXTO01000005.1	172187	172906	+	151
			PDC-S14	PDC-S14	WP_196678509.1	GIY-YIG nuclease family protein [Pseudomonas]	NZ_RXTO01000006.1	1093	1782	-	3
			SoFic	SoFic	WP_003085005.1	Fic family protein [Pseudomonas]	NZ_RXTO01000008.1	138626	139747	-	140
			RosmerTA	RmrT	WP_069868774.1	hypothetical protein [Pseudomonas]	NZ_RXTO01000018.1	296	916	+	1
			RosmerTA	RmrA	WP_126583732.1	XRE family transcriptional regulator [Pseudomonas aeruginosa]	NZ_RXTO01000018.1	909	2021	+	2
			RM_type_IIG	REase_MTase_IIG	WP_126583734.1	N-6 DNA methylase [Pseudomonas]	NZ_RXTO01000018.1	5671	8460	-	5
			PD-T4-6	PD-T4-6	WP_003087629.1	serine/threonine protein kinase [Pseudomonas]	NZ_RXTO01000022.1	20403	21392	+	17
			PDC-S02	PDC-S02	WP_003092331.1	PDDEXK nuclease domain-containing protein [Proteobacteria]	NZ_RXTO01000031.1	2195	3259	-	3
			PDC-M30	PDC-M30A	WP_003111048.1	three-Cys-motif partner protein TcmP [Pseudomonas]	NZ_RXTO01000035.1	49786	51102	-	51
			PDC-M30	PDC-M30B	WP_003111049.1	phage Gp37/Gp68 family protein [Pseudomonas]	NZ_RXTO01000035.1	51124	51867	-	52
			PsyrTA	PsyrT	WP_023098559.1	RecQ family ATP-dependent DNA helicase [Pseudomonas]	NZ_RXTO01000060.1	19518	21596	+	25
			PsyrTA	PsyrA	WP_014603868.1	DNA-processing protein DprA [Pseudomonas]	NZ_RXTO01000060.1	21593	22972	+	26
			RM_type_I	MTase_I	WP_014603867.1	type I restriction-modification system subunit M [Pseudomonas]	NZ_RXTO01000060.1	23043	24539	+	27
			RM_type_I	MTase_I	WP_014603866.1	type I restriction-modification system subunit M [Pseudomonas]	NZ_RXTO01000060.1	24536	26059	+	28
			gabija	GajA	WP_014603865.1	AAA family ATPase [Pseudomonas]	NZ_RXTO01000060.1	26056	27960	+	29
			gabija	GajB	WP_003090631.1	ATP-dependent helicase [Pseudomonas]	NZ_RXTO01000060.1	27957	29633	+	30
			RM_type_I	Specificity_I	WP_014603864.1	restriction endonuclease subunit S [Pseudomonas]	NZ_RXTO01000060.1	29630	30781	+	31
			RM_type_I	REase_I	WP_003090627.1	type I restriction endonuclease subunit R [Pseudomonas]	NZ_RXTO01000060.1	30786	33779	+	32
			PDC-S26	PDC-S26	WP_003084153.1	PD-(D/E)XK nuclease family protein [Pseudomonas aeruginosa]	NZ_RXTO01000064.1	8256	9350	-	6
			PDC-S05	PDC-S05	WP_003084155.1	virulence RhuM family protein [Pseudomonas]	NZ_RXTO01000064.1	9387	10391	-	7
			PDC-S34	PDC-S34	WP_003084157.1	haloacid dehalogenase-like hydrolase [Pseudomonas]	NZ_RXTO01000064.1	10393	11229	-	8
			DMS_other	Specificity_I	WP_071536259.1	restriction endonuclease subunit S [Pseudomonas]	NZ_RXTO01000064.1	11229	12437	-	9
			DMS_other	MTase_I	WP_003084161.1	type I restriction-modification system subunit M [Pseudomonas]	NZ_RXTO01000064.1	12427	13950	-	10
			PDC-S09	PDC-S09	WP_001247892.1	nucleotidyltransferase [Bacteria]	NZ_RXTO01000067.1	9464	9754	+	13
			druantia_type_II	DruE2	WP_003089206.1	DEAD/DEAH box helicase [Pseudomonas]	NZ_RXTO01000069.1	5017	10857	-	7
			druantia_type_II	DruG2	WP_169309831.1	hypothetical protein [Pseudomonas]	NZ_RXTO01000069.1	10871	12955	-	8
			druantia_type_II	DruF2	WP_003089200.1	hypothetical protein [Pseudomonas]	NZ_RXTO01000069.1	13020	15572	-	9
			druantia_type_II	DruM2	WP_042113812.1	DNA (cytosine-5-)-methyltransferase [Pseudomonas]	NZ_RXTO01000069.1	15569	16753	-	10
			VSPR	MTase_II	WP_042113812.1	DNA (cytosine-5-)-methyltransferase [Pseudomonas]	NZ_RXTO01000069.1	15569	16753	-	10
			VSPR	Vsr	WP_042115191.1	DNA mismatch endonuclease Vsr [Pseudomonas]	NZ_RXTO01000069.1	16867	17238	+	11
			wadjet_type_I	JetA1	WP_071536260.1	DUF3375 domain-containing protein [Pseudomonas]	NZ_RXTO01000071.1	3984	5483	+	4
			wadjet_type_I	JetB1	WP_014603489.1	DUF4194 domain-containing protein [Pseudomonas]	NZ_RXTO01000071.1	5486	6235	+	5
			wadjet_type_I	JetC1	WP_023103839.1	AAA family ATPase [Pseudomonas]	NZ_RXTO01000071.1	6232	9537	+	6
			wadjet_type_I	JetD1	WP_023103840.1	DUF2220 family protein [Pseudomonas]	NZ_RXTO01000071.1	9521	10678	+	7
		5539	SoFic	SoFic	WP_023098843.1	Fic family protein [Proteobacteria]	NZ_RXTN01000022.1	177402	178502	+	160	16	18.57
			HEC-05	HEC-05	WP_023098849.1	DUF262 domain-containing protein [Proteobacteria]	NZ_RXTN01000022.1	194358	196073	+	167
			SoFic	SoFic	WP_003085005.1	Fic family protein [Pseudomonas]	NZ_RXTN01000023.1	137680	138801	-	139
			PDC-S06	PDC-S06	WP_006379607.1	AAA family ATPase [Proteobacteria]	NZ_RXTN01000024.1	132093	134396	+	125
			PDC-S02	PDC-S02	WP_003092331.1	PDDEXK nuclease domain-containing protein [Proteobacteria]	NZ_RXTN01000024.1	135324	136388	-	127
			PD-T4-6	PD-T4-6	WP_003087629.1	serine/threonine protein kinase [Pseudomonas]	NZ_RXTN01000032.1	20403	21392	+	17
			VSPR	Vsr	WP_042115191.1	DNA mismatch endonuclease Vsr [Pseudomonas]	NZ_RXTN01000040.1	264	635	-	2
			druantia_type_II	DruM2	WP_042113812.1	DNA (cytosine-5-)-methyltransferase [Pseudomonas]	NZ_RXTN01000040.1	749	1933	+	3
			VSPR	MTase_II	WP_042113812.1	DNA (cytosine-5-)-methyltransferase [Pseudomonas]	NZ_RXTN01000040.1	749	1933	+	3
			druantia_type_II	DruF2	WP_003089200.1	hypothetical protein [Pseudomonas]	NZ_RXTN01000040.1	1930	4482	+	4
			druantia_type_II	DruG2	WP_169309831.1	hypothetical protein [Pseudomonas]	NZ_RXTN01000040.1	4547	6631	+	5
			druantia_type_II	DruE2	WP_003089206.1	DEAD/DEAH box helicase [Pseudomonas]	NZ_RXTN01000040.1	6645	12485	+	6
			RM_type_I	MTase_I	WP_033978286.1	type I restriction-modification system subunit M [Gammaproteobacteria]	NZ_RXTN01000041.1	47230	48786	+	47
			PrrC	PrrC	WP_019727090.1	hypothetical protein [Gammaproteobacteria]	NZ_RXTN01000041.1	50069	51211	+	49
			RM_type_I	REase_I	WP_033936963.1	type I restriction endonuclease subunit R [Gammaproteobacteria]	NZ_RXTN01000041.1	51204	54305	+	50
			PDC-S05	PDC-S05	WP_019727088.1	virulence RhuM family protein [Gammaproteobacteria]	NZ_RXTN01000041.1	54376	55419	+	51
			PDC-S14	PDC-S14	WP_196678509.1	GIY-YIG nuclease family protein [Pseudomonas]	NZ_RXTN01000043.1	61836	62525	+	54
			PDC-S09	PDC-S09	WP_001247892.1	nucleotidyltransferase [Bacteria]	NZ_RXTN01000044.1	55158	55448	-	65
			RM_type_I	REase_I	WP_003090627.1	type I restriction endonuclease subunit R [Pseudomonas]	NZ_RXTN01000049.1	249	3242	-	1
			RM_type_I	Specificity_I	WP_014603864.1	restriction endonuclease subunit S [Pseudomonas]	NZ_RXTN01000049.1	3247	4398	-	2
			gabija	GajB	WP_003090631.1	ATP-dependent helicase [Pseudomonas]	NZ_RXTN01000049.1	4395	6071	-	3
			gabija	GajA	WP_014603865.1	AAA family ATPase [Pseudomonas]	NZ_RXTN01000049.1	6068	7972	-	4
			RM_type_I	MTase_I	WP_014603866.1	type I restriction-modification system subunit M [Pseudomonas]	NZ_RXTN01000049.1	7969	9492	-	5
			RM_type_I	MTase_I	WP_014603867.1	type I restriction-modification system subunit M [Pseudomonas]	NZ_RXTN01000049.1	9489	10985	-	6
			PsyrTA	PsyrA	WP_014603868.1	DNA-processing protein DprA [Pseudomonas]	NZ_RXTN01000049.1	11056	12435	-	7
			PsyrTA	PsyrT	WP_023098559.1	RecQ family ATP-dependent DNA helicase [Pseudomonas]	NZ_RXTN01000049.1	12432	14510	-	8
		6220	helicase-DUF2290	Helicase	WP_003159898.1	DEAD/DEAH box helicase [Pseudomonas]	NZ_RXTM01000027.1	19224	21359	+	19	12	1.43
			helicase-DUF2290	DUF2290	WP_003112393.1	DUF2290 domain-containing protein [Pseudomonas]	NZ_RXTM01000027.1	21352	22053	+	20
			PDC-S39	PDC-S39	WP_003112392.1	hypothetical protein [Pseudomonas]	NZ_RXTM01000027.1	22556	24385	-	21
			SoFic	SoFic	WP_003117952.1	Fic family protein [Pseudomonas]	NZ_RXTM01000038.1	134399	135520	-	138
			PD-T4-6	PD-T4-6	WP_003097784.1	serine/threonine protein kinase [Pseudomonas]	NZ_RXTM01000041.1	20689	21678	+	17
			GAO_19	SIR2	WP_031275667.1	SIR2 family protein [Pseudomonas aeruginosa]	NZ_RXTM01000091.1	29025	30101	+	41
			GAO_19	HerA	WP_044719475.1	ATP-binding protein [Pseudomonas aeruginosa]	NZ_RXTM01000091.1	30109	31869	+	42
			DMS_other	mad8	WP_044719475.1	ATP-binding protein [Pseudomonas aeruginosa]	NZ_RXTM01000091.1	30109	31869	+	42
			DMS_other	BrxHI	WP_044719479.1	DEAD/DEAH box helicase family protein [Pseudomonas aeruginosa]	NZ_RXTM01000091.1	35662	38430	+	45
			PDC-S70	PDC-S70	WP_079453009.1	hypothetical protein [Pseudomonas aeruginosa]	NZ_RXTM01000091.1	43154	43798	-	50
			CRISPR_array	CRISPR_array	CRISPR001	CRISPR001; repeat=GTTCACTGCCGTATAGGCAGCTAAGAAA; score=6.12	NZ_RXTM01000127.1	34045	34792	+	21.01
			cas_type_I-F1	Cas6f	WP_003162920.1	type I-F CRISPR-associated endoribonuclease Cas6/Csy4 [Pseudomonas]	NZ_RXTM01000127.1	34916	35479	-	22
			cas_type_I-F1	Cas7f	WP_003143949.1	type I-F CRISPR-associated protein Csy3 [Pseudomonas]	NZ_RXTM01000127.1	35483	36511	-	23
			cas_type_I-F1	Cas5f	WP_003116910.1	type I-F CRISPR-associated protein Csy2 [Pseudomonas]	NZ_RXTM01000127.1	36522	37505	-	24
			cas_type_I-F1	Cas8f	WP_004343803.1	type I-F CRISPR-associated protein Csy1 [Pseudomonas]	NZ_RXTM01000127.1	37492	38796	-	25
			cas_type_I-F1	Cas23f	WP_010793036.1	type I-F CRISPR-associated helicase Cas3f [Pseudomonas]	NZ_RXTM01000127.1	38854	42084	-	26
			cas_type_I-F1	Cas1f	WP_010793035.1	type I-F CRISPR-associated endonuclease Cas1f [Pseudomonas]	NZ_RXTM01000127.1	42081	43055	-	27
			CRISPR_array	CRISPR_array	CRISPR002	CRISPR002; repeat=GTTCACTGCCGTGTAGGCAGCTAAGAAA; score=6.26	NZ_RXTM01000127.1	43317	45204	-	27.02
			PDC-S02	PDC-S02	WP_020750775.1	PDDEXK nuclease domain-containing protein [Proteobacteria]	NZ_RXTM01000130.1	34842	35906	-	38
			RosmerTA	RmrT	WP_123822992.1	hypothetical protein [Pseudomonas aeruginosa]	NZ_RXTM01000142.1	468	1130	+	1
			RosmerTA	RmrA	WP_160297715.1	XRE family transcriptional regulator [Pseudomonas aeruginosa]	NZ_RXTM01000142.1	1215	2357	+	2
			Mokosh_TypeI	MkoA	WP_044720033.1	NERD domain-containing protein [Pseudomonas aeruginosa]	NZ_RXTM01000165.1	1307	6265	+	2
			Mokosh_TypeI	MkoB	WP_044720034.1	hypothetical protein [Pseudomonas aeruginosa]	NZ_RXTM01000165.1	6258	7814	+	3
			PDC-M30	PDC-M30B	WP_003117069.1	phage Gp37/Gp68 family protein [Pseudomonas]	NZ_RXTM01000172.1	60	803	-	1
			PDC-M30	PDC-M30A	WP_003117068.1	three-Cys-motif partner protein TcmP [Pseudomonas aeruginosa]	NZ_RXTM01000172.1	1036	2226	-	2
		6241	AVAST_type_III	Avs3a	WP_003154773.1	hypothetical protein [Pseudomonas aeruginosa]	NZ_RXTL01000005.1	172565	178822	+	165	30	2.86
			AVAST_type_III	Avs3b	WP_126593860.1	hypothetical protein [Pseudomonas aeruginosa]	NZ_RXTL01000005.1	178773	179477	+	166
			SoFic	SoFic	WP_012074122.1	Fic family protein [Pseudomonas aeruginosa]	NZ_RXTL01000005.1	486023	487144	-	457
			PD-T4-6	PD-T4-6	WP_003149359.1	serine/threonine protein kinase [Pseudomonas aeruginosa]	NZ_RXTL01000010.1	304643	305632	+	281
			CRISPR_array	CRISPR_array	CRISPR001	CRISPR001; repeat=GTTCACTGCCGTATAGGCAGCTAAGAAA; score=6.26	NZ_RXTL01000012.1	25330	25657	+	21.01
			cbass_type_III	Effector	WP_003050273.1	cbass effector endonuclease NucC [Proteobacteria]	NZ_RXTL01000020.1	85075	85800	-	88
			cbass_type_III	Cyclase	WP_003153640.1	nucleotidyltransferase domain-containing protein [Proteobacteria]	NZ_RXTL01000020.1	85839	86741	-	89
			cbass_type_III	HORMA	WP_003090159.1	hypothetical protein [Proteobacteria]	NZ_RXTL01000020.1	86741	87241	-	90
			cbass_type_III	HORMA	WP_003153638.1	hypothetical protein [Proteobacteria]	NZ_RXTL01000020.1	87238	87708	-	91
			cbass_type_III	TRIP13	WP_003050256.1	AAA family ATPase [Proteobacteria]	NZ_RXTL01000020.1	87705	88619	-	92
			PDC-S02	PDC-S02	WP_126593909.1	PDDEXK nuclease domain-containing protein [Pseudomonas aeruginosa]	NZ_RXTL01000023.1	43013	44074	-	37
			RM_type_IIG	REase_MTase_IIG	WP_126593910.1	N-6 DNA methylase [Pseudomonas aeruginosa]	NZ_RXTL01000023.1	44071	46869	-	38
			wadjet_other	JetD	WP_003117293.1	DUF2220 family protein [Pseudomonas aeruginosa]	NZ_RXTL01000025.1	57531	58700	-	53
			wadjet_other	JetC	WP_003117292.1	hypothetical protein [Pseudomonas aeruginosa]	NZ_RXTL01000025.1	58697	59848	-	54
			PDC-M30	PDC-M30A	WP_003111048.1	three-Cys-motif partner protein TcmP [Pseudomonas]	NZ_RXTL01000025.1	84034	85350	-	76
			PDC-M30	PDC-M30B	WP_003111049.1	phage Gp37/Gp68 family protein [Pseudomonas]	NZ_RXTL01000025.1	85372	86115	-	77
			gabija	GajA	WP_023442859.1	ATP-dependent endonuclease [Pseudomonas aeruginosa]	NZ_RXTL01000031.1	15452	17764	+	14
			gabija	GajB	WP_023442858.1	AAA family ATPase [Pseudomonas aeruginosa]	NZ_RXTL01000031.1	17757	19694	+	15
			DMS_other	WYL	pseudo_subWP_017244888.1	WYL domain-containing protein [Pseudomonas stutzeri]	NZ_RXTL01000031.1	55127	55288	-	43
			DMS_other	DrmD	WP_058162726.1	DEAD/DEAH box helicase [Pseudomonas]	NZ_RXTL01000031.1	55541	58423	+	44
			DMS_other	mad3	WP_202982209.1	AAA family ATPase [Pseudomonas]	NZ_RXTL01000031.1	58564	61506	+	45
			RM_type_III	MTase_III	WP_003151701.1	site-specific DNA-methyltransferase [Pseudomonas]	NZ_RXTL01000031.1	63595	65286	+	47
			RM_type_III	REase_III	WP_003151700.1	DEAD/DEAH box helicase family protein [Pseudomonas]	NZ_RXTL01000031.1	65339	68107	+	48
			HEC-06	HEC-06	WP_003151698.1	DUF262 domain-containing protein [Pseudomonas aeruginosa]	NZ_RXTL01000031.1	68245	70377	+	49
			CRISPR_array	CRISPR_array	CRISPR002	CRISPR002; repeat=GTTCACTGCCGTGTAGGCAGCTAAGAAA; score=6.23	NZ_RXTL01000034.1	801	1129	+	1.01
			AbiE	AbiEi	WP_020750746.1	type IV toxin-antitoxin system AbiEi family antitoxin domain-containing protein [Pseudomonas]	NZ_RXTL01000035.1	11874	12695	+	13
			AbiE	AbiEii	WP_003108486.1	nucleotidyl transferase AbiEii/AbiGii toxin family protein [Pseudomonas]	NZ_RXTL01000035.1	12679	13614	+	14
			HEC-03	HEC-03B	WP_020750756.1	DUF3696 domain-containing protein [Pseudomonas]	NZ_RXTL01000035.1	74929	76326	+	73
			HEC-03	HEC-03A	WP_071533900.1	hypothetical protein [Pseudomonas]	NZ_RXTL01000035.1	76323	76853	+	74
			DMS_other	WYL	WP_096010326.1	WYL domain-containing protein [Pseudomonas]	NZ_RXTL01000035.1	79218	80120	+	78
			PsyrTA	PsyrT	WP_003151119.1	RecQ family ATP-dependent DNA helicase [Pseudomonas]	NZ_RXTL01000035.1	80125	82203	+	79
			PsyrTA	PsyrA	WP_003151118.1	DNA-processing protein DprA [Pseudomonas]	NZ_RXTL01000035.1	82200	83609	+	80
			RM_type_I	MTase_I	WP_221767947.1	N-6 DNA methylase [Pseudomonas aeruginosa]	NZ_RXTL01000035.1	83675	85171	+	81
			RM_type_I	MTase_I	WP_003151116.1	type I restriction-modification system subunit M [Pseudomonas aeruginosa]	NZ_RXTL01000035.1	85168	86691	+	82
			gabija	GajA	WP_096010323.1	AAA family ATPase [Pseudomonas]	NZ_RXTL01000035.1	86688	88613	+	83
			gabija	GajB	WP_096010322.1	ATP-dependent helicase [Pseudomonas]	NZ_RXTL01000035.1	88610	90286	+	84
			RM_type_I	Specificity_I	WP_096010321.1	restriction endonuclease subunit S [Pseudomonas]	NZ_RXTL01000035.1	90283	91467	+	85
			RM_type_I	REase_I	WP_096010320.1	HsdR family type I site-specific deoxyribonuclease [Pseudomonas]	NZ_RXTL01000035.1	91464	94454	+	86
			PDC-M30	PDC-M30B	WP_003131934.1	phage Gp37/Gp68 family protein [Pseudomonas]	NZ_RXTL01000039.1	6863	7606	+	13
			PDC-M30	PDC-M30A	WP_003131931.1	three-Cys-motif partner protein TcmP [Pseudomonas]	NZ_RXTL01000039.1	7629	8948	+	14
			PDC-S06	PDC-S06	WP_010794466.1	AAA family ATPase [Pseudomonas]	NZ_RXTL01000041.1	5293	7908	+	10
			zorya_type_I	ZorD1	WP_025297649.1	DEAD/DEAH box helicase [Pseudomonas]	NZ_RXTL01000041.1	9733	12819	-	12
			zorya_type_I	ZorC1	WP_023096322.1	hypothetical protein [Pseudomonas]	NZ_RXTL01000041.1	12820	14832	-	13
			zorya_type_I	ZorB1	WP_012077892.1	OmpA family protein [Pseudomonas]	NZ_RXTL01000041.1	14829	15593	-	14
			zorya_type_I	ZorA1	WP_012077893.1	anti-phage defense ZorAB system protein ZorA [Pseudomonas]	NZ_RXTL01000041.1	15593	17719	-	15
			PDC-S11	PDC-S11	WP_012077894.1	endonuclease NucS [Pseudomonas]	NZ_RXTL01000041.1	17772	18848	-	16
			RM_type_I	Specificity_I	WP_012077895.1	restriction endonuclease subunit S [Pseudomonas]	NZ_RXTL01000041.1	18866	20509	-	17
			RM_type_I	MTase_I	WP_012077896.1	type I restriction-modification system subunit M [Pseudomonas]	NZ_RXTL01000041.1	20506	21975	-	18
			RM_type_I	REase_I	WP_012077898.1	DEAD/DEAH box helicase family protein [Pseudomonas]	NZ_RXTL01000041.1	23336	25702	-	20
			DMS_other	WYL	WP_023094261.1	WYL domain-containing protein [Pseudomonas]	NZ_RXTL01000041.1	27226	28101	+	23
			gabija	GajB	WP_020750449.1	UvrD-helicase domain-containing protein [Pseudomonas aeruginosa]	NZ_RXTL01000044.1	48099	49166	-	45
			gabija	GajA	WP_003100901.1	AAA family ATPase [Pseudomonas aeruginosa]	NZ_RXTL01000044.1	49159	50763	-	46
			PDC-S09	PDC-S09	WP_001247892.1	nucleotidyltransferase [Bacteria]	NZ_RXTL01000044.1	58067	58357	+	56
			Lamassu_Family	LmuB	WP_031652490.1	DUF3732 domain-containing protein [Pseudomonas]	NZ_RXTL01000051.1	30958	32913	-	21
			Lamassu_Family	LmuC	WP_003150491.1	DUF6521 family protein [Pseudomonas]	NZ_RXTL01000051.1	32910	33398	-	22
			Lamassu_Family	LmuA	WP_023442825.1	hypothetical protein [Pseudomonas aeruginosa]	NZ_RXTL01000051.1	33395	34618	-	23
			druantia_type_II	DruM2	WP_108201907.1	DNA (cytosine-5-)-methyltransferase [Pseudomonas aeruginosa]	NZ_RXTL01000064.1	3814	5013	+	6
			druantia_type_II	DruF2	WP_058167333.1	hypothetical protein [Pseudomonas aeruginosa]	NZ_RXTL01000064.1	5297	7837	+	7
			druantia_type_II	DruG2	WP_031692137.1	hypothetical protein [Pseudomonas aeruginosa]	NZ_RXTL01000064.1	7866	9959	+	8
			druantia_type_II	DruE2	WP_031692138.1	DEAD/DEAH box helicase [Pseudomonas aeruginosa]	NZ_RXTL01000064.1	9972	15842	+	9
			PDC-S24	PDC-S24	WP_010792811.1	Fic family protein [Pseudomonas]	NZ_RXTL01000069.1	4778	6283	-	11
			RM_type_II	REase_II	WP_023092930.1	ATP-binding protein [Pseudomonas]	NZ_RXTL01000088.1	467	2569	+	2
			RM_type_II	MTase_II	WP_071536083.1	DNA cytosine methyltransferase [Pseudomonas]	NZ_RXTL01000088.1	2556	3782	-	3
			CRISPR_array	CRISPR_array	CRISPR003	CRISPR003; repeat=GTTCACTGCCGTATAGGCAGCTAAGAAA; score=6.26	NZ_RXTL01000097.1	28	596	-	0.01
		6678	PDC-S14	PDC-S14	WP_196678509.1	GIY-YIG nuclease family protein [Pseudomonas]	NZ_RXTK01000008.1	1093	1782	-	3	13	0
			cbass_type_III	TRIP13	WP_016852809.1	AAA family ATPase [Proteobacteria]	NZ_RXTK01000008.1	253947	254861	+	240
			cbass_type_III	HORMA	WP_003090160.1	hypothetical protein [Proteobacteria]	NZ_RXTK01000008.1	254858	255328	+	241
			cbass_type_III	HORMA	WP_003090159.1	hypothetical protein [Proteobacteria]	NZ_RXTK01000008.1	255325	255825	+	242
			cbass_type_III	Cyclase	WP_003090158.1	nucleotidyltransferase domain-containing protein [Proteobacteria]	NZ_RXTK01000008.1	255825	256727	+	243
			cbass_type_III	Effector	WP_003050273.1	cbass effector endonuclease NucC [Proteobacteria]	NZ_RXTK01000008.1	256766	257491	+	244
			HEC-05	HEC-05	WP_023098849.1	DUF262 domain-containing protein [Proteobacteria]	NZ_RXTK01000009.1	21707	23422	-	20
			SoFic	SoFic	WP_023098843.1	Fic family protein [Proteobacteria]	NZ_RXTK01000009.1	39278	40378	-	27
			PD-T4-6	PD-T4-6	WP_003087629.1	serine/threonine protein kinase [Pseudomonas]	NZ_RXTK01000017.1	20387	21376	+	17
			PDC-S06	PDC-S06	pseudo_subWP_011002530.1	AAA family ATPase [Ralstonia]	NZ_RXTK01000027.1	41529	42482	+	44
			PDC-S09	PDC-S09	WP_001247892.1	nucleotidyltransferase [Bacteria]	NZ_RXTK01000027.1	52814	53104	-	60
			SoFic	SoFic	WP_003085005.1	Fic family protein [Pseudomonas]	NZ_RXTK01000033.1	77882	79003	+	79
			druantia_type_II	DruE2	WP_003089206.1	DEAD/DEAH box helicase [Pseudomonas]	NZ_RXTK01000037.1	72566	78406	-	67
			druantia_type_II	DruG2	WP_169309831.1	hypothetical protein [Pseudomonas]	NZ_RXTK01000037.1	78420	80504	-	68
			druantia_type_II	DruF2	WP_003089200.1	hypothetical protein [Pseudomonas]	NZ_RXTK01000037.1	80569	83121	-	69
			druantia_type_II	DruM2	WP_042113812.1	DNA (cytosine-5-)-methyltransferase [Pseudomonas]	NZ_RXTK01000037.1	83118	84302	-	70
			VSPR	MTase_II	WP_042113812.1	DNA (cytosine-5-)-methyltransferase [Pseudomonas]	NZ_RXTK01000037.1	83118	84302	-	70
			VSPR	Vsr	WP_042115191.1	DNA mismatch endonuclease Vsr [Pseudomonas]	NZ_RXTK01000037.1	84416	84787	+	71
			PsyrTA	PsyrT	WP_023098559.1	RecQ family ATP-dependent DNA helicase [Pseudomonas]	NZ_RXTK01000049.1	28421	30499	+	36
			PsyrTA	PsyrA	WP_014603868.1	DNA-processing protein DprA [Pseudomonas]	NZ_RXTK01000049.1	30496	31875	+	37
			RM_type_I	MTase_I	WP_014603867.1	type I restriction-modification system subunit M [Pseudomonas]	NZ_RXTK01000049.1	31946	33442	+	38
			RM_type_I	MTase_I	WP_014603866.1	type I restriction-modification system subunit M [Pseudomonas]	NZ_RXTK01000049.1	33439	34962	+	39
			gabija	GajA	WP_014603865.1	AAA family ATPase [Pseudomonas]	NZ_RXTK01000049.1	34959	36863	+	40
			gabija	GajB	WP_003090631.1	ATP-dependent helicase [Pseudomonas]	NZ_RXTK01000049.1	36860	38536	+	41
			RM_type_I	Specificity_I	WP_014603864.1	restriction endonuclease subunit S [Pseudomonas]	NZ_RXTK01000049.1	38533	39684	+	42
			RM_type_I	REase_I	WP_003090627.1	type I restriction endonuclease subunit R [Pseudomonas]	NZ_RXTK01000049.1	39689	42682	+	43
		6695	DRT_type_III	Drt3b	WP_126428217.1	RNA-directed DNA polymerase [Pseudomonas aeruginosa]	NZ_RXTJ01000005.1	81231	83201	-	81	12	54.29
			DRT_type_III	Drt3a	WP_126428221.1	RNA-directed DNA polymerase [Pseudomonas aeruginosa]	NZ_RXTJ01000005.1	83198	84529	-	82
			PD-T4-6	PD-T4-6	WP_003097784.1	serine/threonine protein kinase [Pseudomonas]	NZ_RXTJ01000009.1	191491	192480	-	189
			PDC-S02	PDC-S02	WP_079382507.1	restriction endonuclease [Pseudomonas aeruginosa]	NZ_RXTJ01000011.1	349	1341	-	2
			septu_type_I	PtuB1	WP_079382506.1	hypothetical protein [Pseudomonas aeruginosa]	NZ_RXTJ01000011.1	1402	2280	-	3
			DMS_other	mad3	WP_033966490.1	AAA family ATPase [Pseudomonas aeruginosa]	NZ_RXTJ01000011.1	2277	4028	-	4
			septu_type_I	PtuA1	WP_033966490.1	AAA family ATPase [Pseudomonas aeruginosa]	NZ_RXTJ01000011.1	2277	4028	-	4
			RM_type_I	Specificity_I	WP_079382505.1	restriction endonuclease subunit S [Pseudomonas aeruginosa]	NZ_RXTJ01000011.1	4030	6261	-	5
			RM_type_I	MTase_I	WP_033966491.1	type I restriction-modification system subunit M [Pseudomonas aeruginosa]	NZ_RXTJ01000011.1	6261	8039	-	6
			RM_type_I	REase_I	WP_033966493.1	DEAD/DEAH box helicase family protein [Pseudomonas aeruginosa]	NZ_RXTJ01000011.1	8076	10511	-	7
			SoFic	SoFic	WP_003117952.1	Fic family protein [Pseudomonas]	NZ_RXTJ01000013.1	56664	57785	-	67
			DMS_other	mad3	WP_003097265.1	DNA replication/repair protein RecF [Pseudomonas]	NZ_RXTJ01000024.1	174367	175476	+	161
			DMS_other	MTase_I	WP_071567748.1	type I restriction-modification system subunit M [Pseudomonas aeruginosa]	NZ_RXTJ01000024.1	178566	180167	+	163
			DMS_other	Specificity_I	WP_079386772.1	restriction endonuclease subunit S [Pseudomonas aeruginosa]	NZ_RXTJ01000024.1	180164	181510	+	164
			DRT_class_II	Drt9	WP_205578375.1	RNA-dependent DNA polymerase [Pseudomonas aeruginosa]	NZ_RXTJ01000024.1	186669	188165	+	168
			Lamassu_Family	LmuA	WP_170869840.1	hypothetical protein [Pseudomonas aeruginosa]	NZ_RXTJ01000032.1	38808	39656	+	32
			Lamassu_Family	LmuC	WP_124083508.1	hypothetical protein [Pseudomonas aeruginosa]	NZ_RXTJ01000032.1	39786	40106	+	33
			Lamassu_Family	LmuB	WP_126428435.1	AAA family ATPase [Pseudomonas aeruginosa]	NZ_RXTJ01000032.1	40110	42194	+	34
			PDC-S07	PDC-S07	WP_025921264.1	(deoxy)nucleoside triphosphate pyrophosphohydrolase [Pseudomonas aeruginosa]	NZ_RXTJ01000035.1	62179	62568	+	64
			kiwa	KwaB	WP_121499923.1	DUF4868 domain-containing protein [Pseudomonas aeruginosa]	NZ_RXTJ01000035.1	63459	64442	-	66
			kiwa	KwaA	WP_121499922.1	hypothetical protein [Pseudomonas aeruginosa]	NZ_RXTJ01000035.1	64439	65029	-	67
		6739	DMS_other	PbeA	WP_030046094.1	DEAD/DEAH box helicase family protein [Pseudomonas aeruginosa]	NZ_RXTI01000003.1	473960	476740	+	463	9	67.14
			DMS_other	Specificity_I	WP_079378354.1	restriction endonuclease subunit S [Pseudomonas aeruginosa]	NZ_RXTI01000003.1	476737	478539	+	464
			DMS_other	mad3	WP_030046098.1	AAA family ATPase [Pseudomonas aeruginosa]	NZ_RXTI01000003.1	478542	480290	+	465
			septu_type_I	PtuA1	WP_030046098.1	AAA family ATPase [Pseudomonas aeruginosa]	NZ_RXTI01000003.1	478542	480290	+	465
			septu_type_I	PtuB1	WP_124204963.1	hypothetical protein [Pseudomonas aeruginosa]	NZ_RXTI01000003.1	480287	481099	+	466
			DMS_other	MTase_I	WP_030046100.1	type I restriction-modification system subunit M [Pseudomonas aeruginosa]	NZ_RXTI01000003.1	481101	482573	+	467
			PDC-S02	PDC-S02	WP_030046101.1	restriction endonuclease [Pseudomonas aeruginosa]	NZ_RXTI01000003.1	482597	483589	+	468
			DRT_class_I	RT_UG9_small	WP_079387722.1	RNA-directed DNA polymerase [Pseudomonas aeruginosa]	NZ_RXTI01000009.1	653365	655200	+	615
			DRT_class_I	RTasPolA	WP_034028846.1	DNA polymerase I [Pseudomonas aeruginosa]	NZ_RXTI01000009.1	655193	656755	+	616
			PD-T4-6	PD-T4-6	WP_003097784.1	serine/threonine protein kinase [Pseudomonas]	NZ_RXTI01000010.1	248232	249221	-	234
			helicase-DUF2290	Helicase	WP_003159898.1	DEAD/DEAH box helicase [Pseudomonas]	NZ_RXTI01000010.1	433092	435227	+	399
			helicase-DUF2290	DUF2290	WP_003112393.1	DUF2290 domain-containing protein [Pseudomonas]	NZ_RXTI01000010.1	435220	435921	+	400
			PDC-S39	PDC-S39	WP_170952243.1	hypothetical protein [Pseudomonas aeruginosa]	NZ_RXTI01000010.1	436424	438253	-	401
			SoFic	SoFic	WP_003113218.1	Fic family protein [Pseudomonas]	NZ_RXTI01000018.1	56635	57756	-	67
			3HP	Hp3	WP_126569367.1	hypothetical protein [Pseudomonas aeruginosa]	NZ_RXTI01000031.1	1388	2059	-	4
			3HP	Hp2	WP_126569368.1	hypothetical protein [Pseudomonas aeruginosa]	NZ_RXTI01000031.1	2061	3185	-	5
			3HP	Hp1	WP_124186703.1	hypothetical protein [Pseudomonas aeruginosa]	NZ_RXTI01000031.1	3178	4155	-	6
		7014	RM_type_II	MTase_II	WP_023105228.1	DNA cytosine methyltransferase [Pseudomonas aeruginosa]	NZ_RXTH01000001.1	436108	437322	+	427	8	34.29
			RM_type_II	REase_II	WP_023105229.1	Eco29kI family restriction endonuclease [Pseudomonas aeruginosa]	NZ_RXTH01000001.1	437319	437969	+	428
			gabija	GajA	WP_023105257.1	ATP-dependent endonuclease [Pseudomonas aeruginosa]	NZ_RXTH01000001.1	648545	650941	+	612
			gabija	GajB	WP_023105258.1	UvrD-helicase domain-containing protein [Pseudomonas aeruginosa]	NZ_RXTH01000001.1	650938	652869	+	613
			upx	upx	WP_023105259.1	hypothetical protein [Pseudomonas aeruginosa]	NZ_RXTH01000001.1	653452	657243	+	614
			Lamassu_Family	LmuB	WP_023105264.1	DUF3732 domain-containing protein [Pseudomonas aeruginosa]	NZ_RXTH01000001.1	666412	668415	-	620
			Lamassu_Family	LmuC	WP_023105265.1	DUF6521 family protein [Pseudomonas aeruginosa]	NZ_RXTH01000001.1	668412	668873	-	621
			Lamassu_Family	LmuA	WP_023105266.1	hypothetical protein [Pseudomonas aeruginosa]	NZ_RXTH01000001.1	668870	670087	-	622
			PD-T4-6	PD-T4-6	WP_003097784.1	serine/threonine protein kinase [Pseudomonas]	NZ_RXTH01000006.1	265689	266678	+	247
			SoFic	SoFic	WP_003113218.1	Fic family protein [Pseudomonas]	NZ_RXTH01000013.1	78015	79136	+	78
			cas_type_I-C	Cas3c	WP_023103416.1	CRISPR-associated helicase/endonuclease Cas3 [Pseudomonas aeruginosa]	NZ_RXTH01000014.1	26214	28448	+	28
			cas_type_I-C	Cas5c	WP_023103415.1	type I-C CRISPR-associated protein Cas5c [Pseudomonas aeruginosa]	NZ_RXTH01000014.1	28499	29173	+	29
			cas_type_I-C	Cas8c	WP_023103414.1	type I-C CRISPR-associated protein Cas8c/Csd1 [Pseudomonas aeruginosa]	NZ_RXTH01000014.1	29170	30933	+	30
			cas_type_I-C	Cas7c	WP_023103413.1	type I-C CRISPR-associated protein Cas7/Csd2 [Pseudomonas aeruginosa]	NZ_RXTH01000014.1	30945	31814	+	31
			cas_type_I-C	Cas4c	WP_023103412.1	CRISPR-associated protein Cas4 [Pseudomonas aeruginosa]	NZ_RXTH01000014.1	31833	32465	+	32
			cas_type_I-C	Cas1c	pseudo_subWP_012701705.1	type I-C CRISPR-associated endonuclease Cas1c [Azotobacter vinelandii]	NZ_RXTH01000014.1	32469	33508	+	33
			cas_type_I-C	Cas2c	WP_023103410.1	CRISPR-associated endonuclease Cas2 [Pseudomonas aeruginosa]	NZ_RXTH01000014.1	33518	33808	+	34
			CRISPR_array	CRISPR_array	CRISPR001	CRISPR001; repeat=CGCGCCCCGCACGGGCGCGTGGATTGAAAC; score=9.15	NZ_RXTH01000014.1	33992	34813	+	34.01
			olokun	OloA	WP_023086340.1	hypothetical protein [Pseudomonas aeruginosa]	NZ_RXTH01000024.1	39124	41718	+	31
			olokun	OloB	WP_124082631.1	hypothetical protein [Pseudomonas aeruginosa]	NZ_RXTH01000024.1	41954	43111	+	32
		8130	PD-T4-6	PD-T4-6	WP_019485001.1	serine/threonine protein kinase [Pseudomonas aeruginosa]	NZ_RXTG01000011.1	93405	94394	+	86	10	45.71
			AbiE	AbiEi	WP_020750746.1	type IV toxin-antitoxin system AbiEi family antitoxin domain-containing protein [Pseudomonas]	NZ_RXTG01000038.1	28206	29027	+	42
			AbiE	AbiEii	WP_003108486.1	nucleotidyl transferase AbiEii/AbiGii toxin family protein [Pseudomonas]	NZ_RXTG01000038.1	29011	29946	+	43
			HEC-03	HEC-03B	WP_020750756.1	DUF3696 domain-containing protein [Pseudomonas]	NZ_RXTG01000038.1	97066	98463	+	107
			HEC-03	HEC-03A	WP_071533900.1	hypothetical protein [Pseudomonas]	NZ_RXTG01000038.1	98460	98990	+	108
			cbass_type_III	Effector	WP_003050273.1	cbass effector endonuclease NucC [Proteobacteria]	NZ_RXTG01000060.1	40229	40954	-	46
			cbass_type_III	Cyclase	WP_003090158.1	nucleotidyltransferase domain-containing protein [Proteobacteria]	NZ_RXTG01000060.1	40993	41895	-	47
			cbass_type_III	HORMA	WP_003090159.1	hypothetical protein [Proteobacteria]	NZ_RXTG01000060.1	41895	42395	-	48
			cbass_type_III	HORMA	WP_003090160.1	hypothetical protein [Proteobacteria]	NZ_RXTG01000060.1	42392	42862	-	49
			cbass_type_III	TRIP13	WP_016852809.1	AAA family ATPase [Proteobacteria]	NZ_RXTG01000060.1	42859	43773	-	50
			PDC-S08	PDC-S08	WP_148107095.1	5'-nucleotidase, partial [Pseudomonas aeruginosa]	NZ_RXTG01000086.1	7145	7906	-	7
			Pycsar_effector	PycTIR	WP_010562503.1	nucleotide-binding protein [Pseudomonas]	NZ_RXTG01000097.1	106365	107291	+	95
			Pycsar_effector	PycC	WP_003127475.1	transcriptional regulator [Pseudomonas]	NZ_RXTG01000097.1	107372	108916	+	96
			Old	Old	WP_023094178.1	AAA family ATPase [Pseudomonas aeruginosa]	NZ_RXTG01000104.1	33940	35700	+	41
			PDC-S24	PDC-S24	WP_019486355.1	Fic family protein [Pseudomonas aeruginosa]	NZ_RXTG01000104.1	58329	59873	+	61
			Mokosh_TypeI	MkoA	WP_033862997.1	NERD domain-containing protein [Pseudomonas]	NZ_RXTG01000138.1	4706	9748	+	7
			Mokosh_TypeI	MkoB	WP_033179073.1	hypothetical protein [Pseudomonas]	NZ_RXTG01000138.1	9748	11172	+	8
			dynamins	LeoA	WP_024947443.1	50S ribosome-binding GTPase [Pseudomonas]	NZ_RXTG01000154.1	1406	3109	-	3
			dynamins	LeoBC	WP_024947442.1	DUF726 domain-containing protein [Pseudomonas]	NZ_RXTG01000154.1	3109	6354	-	4
		8136	DRT_class_III	RT_UG5-nitrilase	WP_126604798.1	Reverse transcriptase [Pseudomonas aeruginosa]	NZ_RXTF01000003.1	303	3296	+	1	28	5.71
			septu_type_I	PtuA1	WP_034025523.1	AAA family ATPase [Pseudomonas aeruginosa]	NZ_RXTF01000004.1	77258	77986	+	70
			septu_type_I	PtuB1	WP_052157231.1	HNH endonuclease [Pseudomonas aeruginosa]	NZ_RXTF01000004.1	77970	78554	+	71
			PD-T4-6	PD-T4-6	WP_071536295.1	protein kinase [Pseudomonas aeruginosa]	NZ_RXTF01000004.1	79030	80127	-	72
			PDC-S08	PDC-S08	pseudo_subWP_008375204.1	5'-nucleotidase [Pseudomonas sp. M47T1]	NZ_RXTF01000004.1	320830	321767	+	298
			PDC-S06	PDC-S06	WP_049247417.1	AAA family ATPase [Pseudomonas]	NZ_RXTF01000005.1	102244	104397	+	134
			DMS_other	DrmA	WP_049247405.1	DEAD/DEAH box helicase [Pseudomonas]	NZ_RXTF01000005.1	118629	122822	-	149
			DMS_other	MTase_II	WP_079385920.1	N-6 DNA methylase [Pseudomonas]	NZ_RXTF01000005.1	125600	127345	-	151
			Lamassu_Family	LmuA	WP_199797945.1	hypothetical protein [Pseudomonas]	NZ_RXTF01000005.1	130889	132172	+	156
			Lamassu_Family	LmuC	WP_049246596.1	DUF6521 family protein [Pseudomonas]	NZ_RXTF01000005.1	132177	132662	+	157
			Lamassu_Family	LmuB	WP_049246599.1	DUF3732 domain-containing protein [Pseudomonas]	NZ_RXTF01000005.1	132659	134602	+	158
			PD-T4-6	PD-T4-6	WP_033981216.1	serine/threonine protein kinase [Pseudomonas aeruginosa]	NZ_RXTF01000009.1	127756	128745	+	118
			wadjet_type_I	JetA1	WP_073625084.1	DUF3375 domain-containing protein [Pseudomonas aeruginosa]	NZ_RXTF01000012.1	2440	3939	+	2
			wadjet_type_I	JetB1	WP_175570863.1	DUF4194 domain-containing protein [Pseudomonas aeruginosa]	NZ_RXTF01000012.1	3942	4691	+	3
			wadjet_type_I	JetC1	WP_073625085.1	AAA family ATPase [Pseudomonas aeruginosa]	NZ_RXTF01000012.1	4688	7993	+	4
			wadjet_type_I	JetD1	WP_049247716.1	DUF2220 family protein [Pseudomonas]	NZ_RXTF01000012.1	7977	9134	+	5
			VSPR	MTase_II	WP_108112694.1	DNA cytosine methyltransferase [Pseudomonas aeruginosa]	NZ_RXTF01000012.1	21198	22271	+	18
			VSPR	Vsr	WP_023095066.1	very short patch repair endonuclease [Pseudomonas aeruginosa]	NZ_RXTF01000012.1	22216	22638	-	19
			DMS_other	DrmC	WP_126604951.1	DISARM system phospholipase D-like protein DrmC [Pseudomonas aeruginosa]	NZ_RXTF01000012.1	22650	23414	-	20
			DMS_other	DrmB	WP_205301649.1	DUF1998 domain-containing protein [Pseudomonas aeruginosa]	NZ_RXTF01000012.1	23416	25278	-	21
			DMS_other	DrmA	WP_073625088.1	DISARM system helicase DrmA [Pseudomonas aeruginosa]	NZ_RXTF01000012.1	25281	29282	-	22
			DMS_other	REase_MTase_IIG	WP_073625089.1	hypothetical protein [Pseudomonas aeruginosa]	NZ_RXTF01000012.1	29344	33648	-	23
			DMS_other	DrmA	WP_049247706.1	DISARM system SNF2-like helicase DrmD [Pseudomonas aeruginosa]	NZ_RXTF01000012.1	33645	36776	-	24
			SoFic	SoFic	WP_003117952.1	Fic family protein [Pseudomonas]	NZ_RXTF01000012.1	364724	365845	-	339
			PDC-S31	PDC-S31	WP_023124085.1	DUF2971 domain-containing protein [Pseudomonas]	NZ_RXTF01000015.1	172714	173463	-	158
			Lamassu_Family	LmuB	WP_023124087.1	DUF3732 domain-containing protein [Pseudomonas]	NZ_RXTF01000015.1	174601	176556	-	160
			Lamassu_Family	LmuC	WP_023124088.1	DUF6521 family protein [Pseudomonas]	NZ_RXTF01000015.1	176553	177041	-	161
			Lamassu_Family	LmuA	WP_023124089.1	hypothetical protein [Pseudomonas]	NZ_RXTF01000015.1	177038	178261	-	162
			RosmerTA	RmrT	WP_079753920.1	hypothetical protein [Pseudomonas aeruginosa]	NZ_RXTF01000027.1	11885	12532	+	9
			RosmerTA	RmrA	WP_079753919.1	XRE family transcriptional regulator [Pseudomonas aeruginosa]	NZ_RXTF01000027.1	12529	13731	+	10
			PDC-S06	PDC-S06	WP_023082108.1	AAA family ATPase [Pseudomonas aeruginosa]	NZ_RXTF01000028.1	24080	26695	+	29
			wadjet_type_I	JetD1	WP_023082125.1	DUF3322 domain-containing protein [Pseudomonas aeruginosa]	NZ_RXTF01000028.1	58555	59748	-	60
			wadjet_type_I	JetC1	WP_031656628.1	AAA family ATPase [Pseudomonas aeruginosa]	NZ_RXTF01000028.1	59745	63131	-	61
			wadjet_type_I	JetB1	WP_023106889.1	DUF4194 domain-containing protein [Pseudomonas]	NZ_RXTF01000028.1	63124	63879	-	62
			wadjet_type_I	JetA1	WP_021263338.1	DUF3375 domain-containing protein [Pseudomonas]	NZ_RXTF01000028.1	63876	65330	-	63
			cbass_type_II	Effector	WP_023082129.1	SAVED domain-containing protein [Pseudomonas aeruginosa]	NZ_RXTF01000028.1	67168	68343	+	67
			cbass_type_II	Cyclase	WP_031656629.1	nucleotidyltransferase [Pseudomonas aeruginosa]	NZ_RXTF01000028.1	68343	69593	+	68
			cbass_type_II	E1-E2	WP_031656630.1	ThiF family adenylyltransferase [Pseudomonas aeruginosa]	NZ_RXTF01000028.1	69577	71361	+	69
			cbass_type_II	JAB	WP_021263329.1	Mov34/MPN/PAD-1 family protein [Pseudomonas aeruginosa]	NZ_RXTF01000028.1	71358	71849	+	70
			cbass_type_II	Effector	WP_031300006.1	3'-5' exonuclease [Pseudomonas aeruginosa]	NZ_RXTF01000028.1	71846	72394	-	71
			PDC-M66	PDC-M66A	WP_073625077.1	hypothetical protein [Pseudomonas aeruginosa]	NZ_RXTF01000030.1	33943	34686	+	43
			PDC-M66	PDC-M66B	WP_073625076.1	DUF3037 domain-containing protein [Pseudomonas aeruginosa]	NZ_RXTF01000030.1	34683	35525	+	44
			PDC-S42	PDC-S42	WP_120349545.1	hypothetical protein [Pseudomonas aeruginosa]	NZ_RXTF01000031.1	12670	13596	-	18
			PDC-S32	PDC-S32	WP_023093719.1	hypothetical protein [Pseudomonas aeruginosa]	NZ_RXTF01000034.1	36890	37699	+	59
			cas_type_IV-A	typeIV_Cas7	WP_023093823.1	RAMP superfamily CRISPR-associated protein [Pseudomonas]	NZ_RXTF01000034.1	136389	137489	+	172
			cas_type_IV-A	typeIV_Cas6	WP_023093824.1	type I-F CRISPR-associated endoribonuclease Cas6/Csy4 [Pseudomonas]	NZ_RXTF01000034.1	137477	138031	+	173
			cas_type_IV-A	typeIV_DinG	WP_023093825.1	ATP-dependent DNA helicase [Pseudomonas]	NZ_RXTF01000034.1	138045	140258	+	174
			cas_type_IV-A	typeIV_Cas5	WP_023093826.1	hypothetical protein [Pseudomonas]	NZ_RXTF01000034.1	140258	140938	+	175
			cas_type_other	Cas1	WP_161558081.1	type I-F CRISPR-associated endonuclease Cas1f [Pseudomonas]	NZ_RXTF01000034.1	140976	141812	+	176
			CRISPR_array	CRISPR_array	CRISPR001	CRISPR001; repeat=GTGTGCCGCCGTGTAGGTGGCTTGAAG; score=2.77	NZ_RXTF01000034.1	142152	142837	+	177.01
			AbiE	AbiEi	WP_031684015.1	DUF6088 family protein [Pseudomonas aeruginosa]	NZ_RXTF01000034.1	151192	151782	+	187
			AbiE	AbiEii	WP_023093836.1	nucleotidyl transferase AbiEii/AbiGii toxin family protein [Pseudomonas aeruginosa]	NZ_RXTF01000034.1	151775	152788	+	188
			PDC-M30	PDC-M30A	WP_003111048.1	three-Cys-motif partner protein TcmP [Pseudomonas]	NZ_RXTF01000042.1	19311	20627	-	17
			PDC-M30	PDC-M30B	WP_003111049.1	phage Gp37/Gp68 family protein [Pseudomonas]	NZ_RXTF01000042.1	20649	21392	-	18
			DMS_other	WYL	WP_023094261.1	WYL domain-containing protein [Pseudomonas]	NZ_RXTF01000047.1	26435	27310	-	30
			RM_type_I	REase_I	WP_012077898.1	DEAD/DEAH box helicase family protein [Pseudomonas]	NZ_RXTF01000047.1	28834	31200	+	33
			RM_type_I	MTase_I	WP_073625031.1	type I restriction-modification system subunit M [Pseudomonas aeruginosa]	NZ_RXTF01000047.1	32561	34030	+	35
			RM_type_I	Specificity_I	WP_073625029.1	restriction endonuclease subunit S [Pseudomonas aeruginosa]	NZ_RXTF01000047.1	34027	35679	+	36
			DMS_other	Orf5	WP_073625028.1	DUF262 domain-containing HNH endonuclease family protein [Pseudomonas aeruginosa]	NZ_RXTF01000047.1	35710	37689	+	37
			zorya_type_I	ZorA1	WP_073625025.1	anti-phage defense ZorAB system protein ZorA [Pseudomonas aeruginosa]	NZ_RXTF01000047.1	37728	39854	+	38
			zorya_type_I	ZorB1	WP_073625024.1	OmpA family protein [Pseudomonas aeruginosa]	NZ_RXTF01000047.1	39854	40618	+	39
			zorya_type_I	ZorC1	WP_073625023.1	hypothetical protein [Pseudomonas aeruginosa]	NZ_RXTF01000047.1	40615	42627	+	40
			zorya_type_I	ZorD1	WP_073625021.1	DEAD/DEAH box helicase [Pseudomonas aeruginosa]	NZ_RXTF01000047.1	42628	45669	+	41
			RM_type_I	REase_I	WP_126605090.1	type I restriction endonuclease subunit R [Pseudomonas aeruginosa]	NZ_RXTF01000047.1	50846	53962	-	48
			RM_type_I	Specificity_I	WP_126605092.1	restriction endonuclease subunit S [Pseudomonas aeruginosa]	NZ_RXTF01000047.1	54985	56322	-	50
			RM_type_I	MTase_I	WP_003148685.1	type I restriction-modification system subunit M [Pseudomonas aeruginosa]	NZ_RXTF01000047.1	56312	57913	-	51
		8139	cbass_type_III	TRIP13	WP_016852809.1	AAA family ATPase [Proteobacteria]	NZ_RXTE01000007.1	75612	76526	+	77	12	35.71
			cbass_type_III	HORMA	WP_003090160.1	hypothetical protein [Proteobacteria]	NZ_RXTE01000007.1	76523	76993	+	78
			cbass_type_III	HORMA	WP_003090159.1	hypothetical protein [Proteobacteria]	NZ_RXTE01000007.1	76990	77490	+	79
			cbass_type_III	Cyclase	WP_003090158.1	nucleotidyltransferase domain-containing protein [Proteobacteria]	NZ_RXTE01000007.1	77490	78392	+	80
			cbass_type_III	Effector	WP_003050273.1	cbass effector endonuclease NucC [Proteobacteria]	NZ_RXTE01000007.1	78431	79156	+	81
			PDC-M30	PDC-M30B	WP_015060166.1	phage Gp37/Gp68 family protein [Pseudomonas]	NZ_RXTE01000020.1	11918	12700	+	15
			PDC-M30	PDC-M30A	WP_004352835.1	three-Cys-motif partner protein TcmP [Pseudomonas]	NZ_RXTE01000020.1	12733	13986	+	16
			PD-T4-6	PD-T4-6	WP_003140077.1	serine/threonine protein kinase [Pseudomonas]	NZ_RXTE01000038.1	93376	94365	+	86
			DMS_other	DndC	WP_126586330.1	phosphoadenosine phosphosulfate reductase family protein [Pseudomonas aeruginosa]	NZ_RXTE01000047.1	76752	77984	-	72
			DMS_other	MTase_II	WP_126586332.1	DNA cytosine methyltransferase [Pseudomonas aeruginosa]	NZ_RXTE01000047.1	77981	79666	-	73
			SoFic	SoFic	WP_126586745.1	Fic family protein [Pseudomonas aeruginosa]	NZ_RXTE01000092.1	79450	80571	+	81
			Lamassu_Family	LmuB	WP_052150779.1	AAA family ATPase [Pseudomonas aeruginosa]	NZ_RXTE01000096.1	9447	11309	-	10
			Lamassu_Family	LmuC	WP_033995694.1	hypothetical protein [Pseudomonas aeruginosa]	NZ_RXTE01000096.1	11306	11746	-	11
			Lamassu_Family	LmuA	WP_033995693.1	hypothetical protein [Pseudomonas aeruginosa]	NZ_RXTE01000096.1	11743	12807	-	12
			DRT_class_I	Drt4	WP_033995686.1	RNA-directed DNA polymerase [Pseudomonas aeruginosa]	NZ_RXTE01000096.1	16394	17695	-	15
			HEC-03	HEC-03A	WP_126586861.1	hypothetical protein [Pseudomonas aeruginosa]	NZ_RXTE01000108.1	43961	44485	-	41
			HEC-03	HEC-03B	WP_126586863.1	DUF3696 domain-containing protein [Pseudomonas aeruginosa]	NZ_RXTE01000108.1	44482	45867	-	42
			Lamassu_Family	LmuB	WP_126587049.1	AAA family ATPase [Pseudomonas aeruginosa]	NZ_RXTE01000135.1	30803	32776	-	21
			Lamassu_Family	LmuC	WP_126587051.1	hypothetical protein [Pseudomonas aeruginosa]	NZ_RXTE01000135.1	32778	33305	-	22
			Lamassu_Family	LmuA	WP_126587052.1	DUF1749 domain-containing protein [Pseudomonas aeruginosa]	NZ_RXTE01000135.1	33295	34527	-	23
			RM_type_I	MTase_I	WP_031690409.1	type I restriction-modification system subunit M [Pseudomonas aeruginosa]	NZ_RXTE01000144.1	10977	12953	+	14
			RM_type_I	Specificity_I	WP_049951351.1	restriction endonuclease subunit S [Pseudomonas aeruginosa]	NZ_RXTE01000144.1	12974	14407	+	15
			RM_type_I	REase_I	WP_031690411.1	DEAD/DEAH box helicase family protein [Pseudomonas aeruginosa]	NZ_RXTE01000144.1	14408	17593	+	16
			RM_type_IV	mREase_IV	WP_031690412.1	restriction endonuclease [Pseudomonas]	NZ_RXTE01000144.1	17620	18531	+	17
			PifA	PifA	WP_031690417.1	NTPase [Pseudomonas aeruginosa]	NZ_RXTE01000159.1	224	2563	+	1
		8141	AVAST_type_III	Avs3a	WP_003154773.1	hypothetical protein [Pseudomonas aeruginosa]	NZ_RXTD01000005.1	172566	178823	+	165	30	25.58
			AVAST_type_III	Avs3b	WP_126593860.1	hypothetical protein [Pseudomonas aeruginosa]	NZ_RXTD01000005.1	178774	179478	+	166
			SoFic	SoFic	WP_012074122.1	Fic family protein [Pseudomonas aeruginosa]	NZ_RXTD01000005.1	486024	487145	-	457
			PD-T4-6	PD-T4-6	WP_003149359.1	serine/threonine protein kinase [Pseudomonas aeruginosa]	NZ_RXTD01000013.1	304398	305387	+	280
			cbass_type_III	Effector	WP_003050273.1	cbass effector endonuclease NucC [Proteobacteria]	NZ_RXTD01000015.1	85076	85801	-	88
			cbass_type_III	Cyclase	WP_003153640.1	nucleotidyltransferase domain-containing protein [Proteobacteria]	NZ_RXTD01000015.1	85840	86742	-	89
			cbass_type_III	HORMA	WP_003090159.1	hypothetical protein [Proteobacteria]	NZ_RXTD01000015.1	86742	87242	-	90
			cbass_type_III	HORMA	WP_003153638.1	hypothetical protein [Proteobacteria]	NZ_RXTD01000015.1	87239	87709	-	91
			cbass_type_III	TRIP13	WP_003050256.1	AAA family ATPase [Proteobacteria]	NZ_RXTD01000015.1	87706	88620	-	92
			PDC-S02	PDC-S02	WP_126593909.1	PDDEXK nuclease domain-containing protein [Pseudomonas aeruginosa]	NZ_RXTD01000018.1	43002	44063	-	37
			RM_type_IIG	REase_MTase_IIG	WP_126593910.1	N-6 DNA methylase [Pseudomonas aeruginosa]	NZ_RXTD01000018.1	44060	46858	-	38
			wadjet_other	JetD	WP_003117293.1	DUF2220 family protein [Pseudomonas aeruginosa]	NZ_RXTD01000020.1	57531	58700	-	53
			wadjet_other	JetC	WP_003117292.1	hypothetical protein [Pseudomonas aeruginosa]	NZ_RXTD01000020.1	58697	59848	-	54
			PDC-M30	PDC-M30A	WP_003111048.1	three-Cys-motif partner protein TcmP [Pseudomonas]	NZ_RXTD01000020.1	84034	85350	-	76
			PDC-M30	PDC-M30B	WP_003111049.1	phage Gp37/Gp68 family protein [Pseudomonas]	NZ_RXTD01000020.1	85372	86115	-	77
			CRISPR_array	CRISPR_array	CRISPR001	CRISPR001; repeat=GTTCACTGCCGTATAGGCAGCTAAGAAA; score=6.26	NZ_RXTD01000025.1	25330	25657	+	21.01
			gabija	GajA	WP_023442859.1	ATP-dependent endonuclease [Pseudomonas aeruginosa]	NZ_RXTD01000029.1	15452	17764	+	14
			gabija	GajB	WP_023442858.1	AAA family ATPase [Pseudomonas aeruginosa]	NZ_RXTD01000029.1	17757	19694	+	15
			DMS_other	WYL	pseudo_subWP_017244888.1	WYL domain-containing protein [Pseudomonas stutzeri]	NZ_RXTD01000029.1	55127	55288	-	43
			DMS_other	DrmD	WP_058162726.1	DEAD/DEAH box helicase [Pseudomonas]	NZ_RXTD01000029.1	55541	58423	+	44
			DMS_other	mad3	WP_202982209.1	AAA family ATPase [Pseudomonas]	NZ_RXTD01000029.1	58564	61506	+	45
			RM_type_III	MTase_III	WP_003151701.1	site-specific DNA-methyltransferase [Pseudomonas]	NZ_RXTD01000029.1	63595	65286	+	47
			RM_type_III	REase_III	WP_003151700.1	DEAD/DEAH box helicase family protein [Pseudomonas]	NZ_RXTD01000029.1	65339	68107	+	48
			HEC-06	HEC-06	WP_003151698.1	DUF262 domain-containing protein [Pseudomonas aeruginosa]	NZ_RXTD01000029.1	68245	70377	+	49
			CRISPR_array	CRISPR_array	CRISPR002	CRISPR002; repeat=GTTCACTGCCGTGTAGGCAGCTAAGAAA; score=6.23	NZ_RXTD01000033.1	801	1129	+	1.01
			AbiE	AbiEi	WP_020750746.1	type IV toxin-antitoxin system AbiEi family antitoxin domain-containing protein [Pseudomonas]	NZ_RXTD01000034.1	11874	12695	+	13
			AbiE	AbiEii	WP_003108486.1	nucleotidyl transferase AbiEii/AbiGii toxin family protein [Pseudomonas]	NZ_RXTD01000034.1	12679	13614	+	14
			HEC-03	HEC-03B	WP_020750756.1	DUF3696 domain-containing protein [Pseudomonas]	NZ_RXTD01000034.1	74929	76326	+	73
			HEC-03	HEC-03A	WP_071533900.1	hypothetical protein [Pseudomonas]	NZ_RXTD01000034.1	76323	76853	+	74
			DMS_other	WYL	WP_096010326.1	WYL domain-containing protein [Pseudomonas]	NZ_RXTD01000034.1	79218	80120	+	78
			PsyrTA	PsyrT	WP_003151119.1	RecQ family ATP-dependent DNA helicase [Pseudomonas]	NZ_RXTD01000034.1	80125	82203	+	79
			PsyrTA	PsyrA	WP_003151118.1	DNA-processing protein DprA [Pseudomonas]	NZ_RXTD01000034.1	82200	83609	+	80
			RM_type_I	MTase_I	WP_221767947.1	N-6 DNA methylase [Pseudomonas aeruginosa]	NZ_RXTD01000034.1	83675	85171	+	81
			RM_type_I	MTase_I	WP_003151116.1	type I restriction-modification system subunit M [Pseudomonas aeruginosa]	NZ_RXTD01000034.1	85168	86691	+	82
			gabija	GajA	WP_096010323.1	AAA family ATPase [Pseudomonas]	NZ_RXTD01000034.1	86688	88613	+	83
			gabija	GajB	WP_096010322.1	ATP-dependent helicase [Pseudomonas]	NZ_RXTD01000034.1	88610	90286	+	84
			RM_type_I	Specificity_I	WP_096010321.1	restriction endonuclease subunit S [Pseudomonas]	NZ_RXTD01000034.1	90283	91467	+	85
			RM_type_I	REase_I	WP_096010320.1	HsdR family type I site-specific deoxyribonuclease [Pseudomonas]	NZ_RXTD01000034.1	91464	94454	+	86
			PDC-S09	PDC-S09	WP_001247892.1	nucleotidyltransferase [Bacteria]	NZ_RXTD01000037.1	10252	10542	-	17
			gabija	GajA	WP_003100901.1	AAA family ATPase [Pseudomonas aeruginosa]	NZ_RXTD01000037.1	17846	19450	+	27
			gabija	GajB	WP_020750449.1	UvrD-helicase domain-containing protein [Pseudomonas aeruginosa]	NZ_RXTD01000037.1	19443	20510	+	28
			PDC-M30	PDC-M30A	WP_003131931.1	three-Cys-motif partner protein TcmP [Pseudomonas]	NZ_RXTD01000039.1	76444	77763	-	89
			PDC-M30	PDC-M30B	WP_003131934.1	phage Gp37/Gp68 family protein [Pseudomonas]	NZ_RXTD01000039.1	77786	78529	-	90
			DMS_other	WYL	WP_023094261.1	WYL domain-containing protein [Pseudomonas]	NZ_RXTD01000040.1	45978	46853	-	41
			RM_type_I	REase_I	WP_012077898.1	DEAD/DEAH box helicase family protein [Pseudomonas]	NZ_RXTD01000040.1	48377	50743	+	44
			RM_type_I	MTase_I	WP_012077896.1	type I restriction-modification system subunit M [Pseudomonas]	NZ_RXTD01000040.1	52104	53573	+	46
			RM_type_I	Specificity_I	WP_012077895.1	restriction endonuclease subunit S [Pseudomonas]	NZ_RXTD01000040.1	53570	55213	+	47
			PDC-S11	PDC-S11	WP_012077894.1	endonuclease NucS [Pseudomonas]	NZ_RXTD01000040.1	55231	56307	+	48
			zorya_type_I	ZorA1	WP_012077893.1	anti-phage defense ZorAB system protein ZorA [Pseudomonas]	NZ_RXTD01000040.1	56360	58486	+	49
			zorya_type_I	ZorB1	WP_012077892.1	OmpA family protein [Pseudomonas]	NZ_RXTD01000040.1	58486	59250	+	50
			zorya_type_I	ZorC1	WP_023096322.1	hypothetical protein [Pseudomonas]	NZ_RXTD01000040.1	59247	61259	+	51
			zorya_type_I	ZorD1	WP_025297649.1	DEAD/DEAH box helicase [Pseudomonas]	NZ_RXTD01000040.1	61260	64346	+	52
			PDC-S06	PDC-S06	WP_010794466.1	AAA family ATPase [Pseudomonas]	NZ_RXTD01000040.1	66171	68786	-	54
			Lamassu_Family	LmuB	WP_031652490.1	DUF3732 domain-containing protein [Pseudomonas]	NZ_RXTD01000050.1	30961	32916	-	21
			Lamassu_Family	LmuC	WP_003150491.1	DUF6521 family protein [Pseudomonas]	NZ_RXTD01000050.1	32913	33401	-	22
			Lamassu_Family	LmuA	WP_023442825.1	hypothetical protein [Pseudomonas aeruginosa]	NZ_RXTD01000050.1	33398	34621	-	23
			druantia_type_II	DruM2	WP_108201907.1	DNA (cytosine-5-)-methyltransferase [Pseudomonas aeruginosa]	NZ_RXTD01000067.1	3814	5013	+	6
			druantia_type_II	DruF2	WP_058167333.1	hypothetical protein [Pseudomonas aeruginosa]	NZ_RXTD01000067.1	5297	7837	+	7
			druantia_type_II	DruG2	WP_031692137.1	hypothetical protein [Pseudomonas aeruginosa]	NZ_RXTD01000067.1	7866	9959	+	8
			druantia_type_II	DruE2	WP_031692138.1	DEAD/DEAH box helicase [Pseudomonas aeruginosa]	NZ_RXTD01000067.1	9972	15842	+	9
			PDC-S24	PDC-S24	WP_010792811.1	Fic family protein [Pseudomonas]	NZ_RXTD01000079.1	1539	3044	+	3
			RM_type_II	REase_II	WP_023092930.1	ATP-binding protein [Pseudomonas]	NZ_RXTD01000091.1	467	2569	+	2
			RM_type_II	MTase_II	WP_071536083.1	DNA cytosine methyltransferase [Pseudomonas]	NZ_RXTD01000091.1	2556	3782	-	3
			CRISPR_array	CRISPR_array	CRISPR003	CRISPR003; repeat=GTTCACTGCCGTATAGGCAGCTAAGAAA; score=6.26	NZ_RXTD01000098.1	29	597	-	0.01
		8912	ietAS	IetA	WP_023083263.1	AAA family ATPase [Pseudomonas aeruginosa]	NZ_RXTC01000001.1	139462	140466	+	126	18	2.86
			ietAS	IetS	WP_160327302.1	S8 family peptidase [Pseudomonas aeruginosa]	NZ_RXTC01000001.1	140677	143076	+	127
			AbiL	AbiLii	WP_079393009.1	RloB family protein [Pseudomonas aeruginosa]	NZ_RXTC01000001.1	567785	568453	-	495
			AbiL	AbiLi	WP_016264139.1	ATP-binding protein [Pseudomonas aeruginosa]	NZ_RXTC01000001.1	568443	569717	-	496
			PDC-S08	PDC-S08	WP_071534444.1	5'-nucleotidase [Pseudomonas aeruginosa]	NZ_RXTC01000006.1	181523	182461	-	177
			PDC-S02	PDC-S02	WP_024087545.1	PDDEXK nuclease domain-containing protein [Proteobacteria]	NZ_RXTC01000006.1	219942	220997	+	208
			PDC-S35	PDC-S35	WP_011002526.1	nucleotide-binding protein [Proteobacteria]	NZ_RXTC01000006.1	229294	229995	+	216
			thoeris_type_I	ThsA1	WP_033936961.1	DUF6430 domain-containing protein [Proteobacteria]	NZ_RXTC01000006.1	230323	231171	-	217
			thoeris_type_I	ThsB1	WP_024087536.1	hypothetical protein [Proteobacteria]	NZ_RXTC01000006.1	231193	231756	-	218
			CRISPR_array	CRISPR_array	CRISPR001	CRISPR001; repeat=GTGTTCCCCACGGGTGTGGGGATGAACCG; score=6.14	NZ_RXTC01000006.1	323349	324108	+	312.01
			cas_type_I-E	Cas3e	WP_034005188.1	CRISPR-associated helicase/endonuclease Cas3 [Pseudomonas aeruginosa]	NZ_RXTC01000006.1	324832	327504	+	314
			cas_type_I-E	Cas8e	WP_034005189.1	type I-E CRISPR-associated protein Cse1/CasA [Pseudomonas aeruginosa]	NZ_RXTC01000006.1	327507	329075	+	315
			cas_type_I-E	Cas11e	WP_034005191.1	type I-E CRISPR-associated protein Cse2/CasB [Pseudomonas aeruginosa]	NZ_RXTC01000006.1	329072	329602	+	316
			cas_type_I-E	Cas7e	WP_023127960.1	type I-E CRISPR-associated protein Cas7/Cse4/CasC [Pseudomonas aeruginosa]	NZ_RXTC01000006.1	329612	330754	+	317
			cas_type_I-E	Cas5e	WP_004348746.1	type I-E CRISPR-associated protein Cas5/CasD [Pseudomonas]	NZ_RXTC01000006.1	330756	331418	+	318
			cas_type_I-E	Cas6e	WP_004348749.1	type I-E CRISPR-associated protein Cas6/Cse3/CasE [Pseudomonas]	NZ_RXTC01000006.1	331393	332004	+	319
			cas_type_I-E	Cas1e	pseudo_subWP_001451768.1	type I-E CRISPR-associated endonuclease Cas1e [Gilliamella apicola]	NZ_RXTC01000006.1	332049	332921	+	320
			cas_type_I-E	Cas2e	WP_003159837.1	type I-E CRISPR-associated endoribonuclease Cas2 [Pseudomonas]	NZ_RXTC01000006.1	332918	333217	+	321
			CRISPR_array	CRISPR_array	CRISPR002	CRISPR002; repeat=GTGTTCCCCACATGCGTGGGGATGAACCG; score=6.26	NZ_RXTC01000006.1	333282	334043	+	321.02
			GAO_19	HerA	WP_071534432.1	ATP-binding protein [Pseudomonas aeruginosa]	NZ_RXTC01000008.1	291067	292839	-	284
			GAO_19	SIR2	WP_079381486.1	SIR2 family protein [Pseudomonas aeruginosa]	NZ_RXTC01000008.1	292832	294076	-	285
			SoFic	SoFic	WP_003137352.1	Fic family protein [Pseudomonas]	NZ_RXTC01000008.1	295154	296275	-	287
			PDC-S02	PDC-S02	WP_023083127.1	PDDEXK nuclease domain-containing protein [Proteobacteria]	NZ_RXTC01000008.1	348593	349657	+	331
			DMS_other	BrxHI	WP_049311444.1	DEAD/DEAH box helicase [Pseudomonas]	NZ_RXTC01000019.1	37392	39809	+	39
			DMS_other	mad3	WP_003097265.1	DNA replication/repair protein RecF [Pseudomonas]	NZ_RXTC01000019.1	43685	44794	-	43
			hachiman_type_I	HamB1	WP_034065730.1	DEAD/DEAH box helicase [Pseudomonas]	NZ_RXTC01000020.1	11903	14887	-	12
			hachiman_type_I	HamA1	WP_023434378.1	SAVED domain-containing protein [Pseudomonas]	NZ_RXTC01000020.1	14889	15683	-	13
			PD-T4-6	PD-T4-6	WP_003140077.1	serine/threonine protein kinase [Pseudomonas]	NZ_RXTC01000029.1	133032	134021	-	147
			wadjet_type_I	JetD1	WP_126620937.1	DUF3322 domain-containing protein, partial [Pseudomonas aeruginosa]	NZ_RXTC01000034.1	1	952	-	1
			wadjet_type_I	JetC1	WP_031656628.1	AAA family ATPase [Pseudomonas aeruginosa]	NZ_RXTC01000034.1	949	4335	-	2
			wadjet_type_I	JetB1	WP_023106889.1	DUF4194 domain-containing protein [Pseudomonas]	NZ_RXTC01000034.1	4328	5083	-	3
			wadjet_type_I	JetA1	WP_021263338.1	DUF3375 domain-containing protein [Pseudomonas]	NZ_RXTC01000034.1	5080	6534	-	4
			cbass_type_II	Effector	WP_023082129.1	SAVED domain-containing protein [Pseudomonas aeruginosa]	NZ_RXTC01000034.1	8372	9547	+	8
			cbass_type_II	Cyclase	WP_031656629.1	nucleotidyltransferase [Pseudomonas aeruginosa]	NZ_RXTC01000034.1	9547	10797	+	9
			cbass_type_II	E1-E2	WP_031656630.1	ThiF family adenylyltransferase [Pseudomonas aeruginosa]	NZ_RXTC01000034.1	10781	12565	+	10
			cbass_type_II	JAB	WP_021263329.1	Mov34/MPN/PAD-1 family protein [Pseudomonas aeruginosa]	NZ_RXTC01000034.1	12562	13053	+	11
			cbass_type_II	Effector	WP_031300006.1	3'-5' exonuclease [Pseudomonas aeruginosa]	NZ_RXTC01000034.1	13050	13598	-	12
			PDC-S70	PDC-S70	WP_071534404.1	hypothetical protein [Pseudomonas aeruginosa]	NZ_RXTC01000041.1	68204	68848	-	75
			PDC-S06	PDC-S06	WP_023082108.1	AAA family ATPase [Pseudomonas aeruginosa]	NZ_RXTC01000046.1	24100	26715	+	29
			PDC-M30	PDC-M30B	WP_003131934.1	phage Gp37/Gp68 family protein [Pseudomonas]	NZ_RXTC01000056.1	4812	5555	+	7
			PDC-M30	PDC-M30A	WP_003131931.1	three-Cys-motif partner protein TcmP [Pseudomonas]	NZ_RXTC01000056.1	5578	6897	+	8
		8914	HEC-01	HEC-01B	WP_071536491.1	DUF4276 family protein [Pseudomonas aeruginosa]	NZ_RXTB01000033.1	111143	111805	-	101	26	2.86
			HEC-01	HEC-01A	WP_071537527.1	AAA family ATPase [Pseudomonas aeruginosa]	NZ_RXTB01000033.1	111809	113200	-	102
			PD-T4-6	PD-T4-6	WP_003097784.1	serine/threonine protein kinase [Pseudomonas]	NZ_RXTB01000046.1	20406	21395	+	17
			DMS_other	WYL	WP_012077903.1	WYL domain-containing protein [Pseudomonas]	NZ_RXTB01000066.1	48751	49767	-	40
			DMS_other	WYL	pseudo_subWP_020308716.1	WYL domain-containing protein [Pseudomonas stutzeri]	NZ_RXTB01000066.1	50866	51351	-	42
			RM_type_I	REase_I	WP_061362869.1	DEAD/DEAH box helicase family protein [Pseudomonas aeruginosa]	NZ_RXTB01000066.1	52875	55241	+	45
			RM_type_I	MTase_I	WP_012077896.1	type I restriction-modification system subunit M [Pseudomonas]	NZ_RXTB01000066.1	56602	58071	+	47
			RM_type_I	Specificity_I	WP_012077895.1	restriction endonuclease subunit S [Pseudomonas]	NZ_RXTB01000066.1	58068	59711	+	48
			PDC-S11	PDC-S11	WP_012077894.1	endonuclease NucS [Pseudomonas]	NZ_RXTB01000066.1	59729	60805	+	49
			zorya_type_I	ZorA1	WP_012077893.1	anti-phage defense ZorAB system protein ZorA [Pseudomonas]	NZ_RXTB01000066.1	60858	62984	+	50
			zorya_type_I	ZorB1	WP_012077892.1	OmpA family protein [Pseudomonas]	NZ_RXTB01000066.1	62984	63748	+	51
			zorya_type_I	ZorC1	WP_023096322.1	hypothetical protein [Pseudomonas]	NZ_RXTB01000066.1	63745	65757	+	52
			zorya_type_I	ZorD1	WP_021263740.1	DEAD/DEAH box helicase [Pseudomonas aeruginosa]	NZ_RXTB01000066.1	65758	68799	+	53
			Lamassu_Family	LmuB	WP_061363014.1	AAA family ATPase [Pseudomonas aeruginosa]	NZ_RXTB01000093.1	16147	18009	-	15
			Lamassu_Family	LmuC	WP_124182833.1	hypothetical protein [Pseudomonas aeruginosa]	NZ_RXTB01000093.1	18006	18458	-	16
			Lamassu_Family	LmuA	WP_033995693.1	hypothetical protein [Pseudomonas aeruginosa]	NZ_RXTB01000093.1	18443	19507	-	17
			DRT_class_I	Drt4	WP_061363017.1	RNA-directed DNA polymerase [Pseudomonas aeruginosa]	NZ_RXTB01000093.1	23094	24395	-	20
			RM_type_II	MTase_II	WP_061362790.1	site-specific DNA-methyltransferase [Pseudomonas aeruginosa]	NZ_RXTB01000106.1	8322	9434	+	10
			RM_type_II	REase_II	WP_061362789.1	restriction endonuclease [Pseudomonas aeruginosa]	NZ_RXTB01000106.1	9438	10115	-	11
			wadjet_type_I	JetA1	WP_071534647.1	DUF3375 domain-containing protein [Pseudomonas]	NZ_RXTB01000122.1	104157	105656	+	102
			wadjet_type_I	JetB1	WP_015647862.1	DUF4194 domain-containing protein [Pseudomonas]	NZ_RXTB01000122.1	105659	106408	+	103
			wadjet_type_I	JetC1	WP_079758794.1	hypothetical protein [Pseudomonas aeruginosa]	NZ_RXTB01000122.1	106405	109710	+	104
			wadjet_type_I	JetD1	WP_061363285.1	DUF2220 family protein [Pseudomonas aeruginosa]	NZ_RXTB01000122.1	109694	110875	+	105
			argonaute_type_III	PprPIWI	WP_003124229.1	RNaseH domain-containing protein [Pseudomonas aeruginosa]	NZ_RXTB01000122.1	111116	113467	-	106
			argonaute_type_III	PprDinG	WP_031756400.1	hypothetical protein [Pseudomonas aeruginosa]	NZ_RXTB01000122.1	113464	116538	-	107
			argonaute_type_III	PprRE	WP_061363284.1	hypothetical protein [Pseudomonas aeruginosa]	NZ_RXTB01000122.1	116522	117562	-	108
			SoFic	SoFic	WP_012613527.1	Fic family protein [Pseudomonas aeruginosa]	NZ_RXTB01000123.1	83761	84882	+	82
			PDC-S24	PDC-S24	WP_043313036.1	Fic family protein [Pseudomonas]	NZ_RXTB01000139.1	14464	15969	+	19
			ietAS	IetS	WP_003160813.1	S8 family peptidase [Gammaproteobacteria]	NZ_RXTB01000152.1	28022	30532	-	30
			ietAS	IetA	WP_003158906.1	AAA family ATPase [Proteobacteria]	NZ_RXTB01000152.1	30510	31541	-	31
			DMS_other	WYL	WP_003158909.1	WYL domain-containing protein [Proteobacteria]	NZ_RXTB01000152.1	33156	34064	+	34
			HEC-06	HEC-06	WP_003158912.1	DUF262 domain-containing protein [Proteobacteria]	NZ_RXTB01000152.1	38111	40234	+	37
			RM_type_III	MTase_III	WP_003158913.1	site-specific DNA-methyltransferase [Proteobacteria]	NZ_RXTB01000152.1	40234	42390	+	38
			RM_type_III	REase_III	WP_003160810.1	DEAD/DEAH box helicase family protein [Proteobacteria]	NZ_RXTB01000152.1	42403	45408	+	39
			PDC-M30	PDC-M30A	WP_003111048.1	three-Cys-motif partner protein TcmP [Pseudomonas]	NZ_RXTB01000160.1	7630	8946	-	7
			PDC-M30	PDC-M30B	WP_003111049.1	phage Gp37/Gp68 family protein [Pseudomonas]	NZ_RXTB01000160.1	8968	9711	-	8
			brex_type_I	BrxL	WP_031684515.1	BREX system Lon protease-like protein BrxL [Pseudomonas aeruginosa]	NZ_RXTB01000164.1	72	2168	-	1
			brex_type_I	PglZ	WP_031684514.1	BREX-1 system phosphatase PglZ type A [Pseudomonas aeruginosa]	NZ_RXTB01000164.1	2181	4688	-	2
			brex_type_I	PglX	WP_196721051.1	BREX-1 system adenine-specific DNA-methyltransferase PglX [Pseudomonas aeruginosa]	NZ_RXTB01000164.1	4696	6402	-	3
			shedu	SduA	WP_031684511.1	DUF4263 domain-containing protein [Pseudomonas aeruginosa]	NZ_RXTB01000164.1	6605	7849	-	5
			brex_type_I	PglX	WP_031684510.1	BREX-1 system adenine-specific DNA-methyltransferase PglX [Pseudomonas aeruginosa]	NZ_RXTB01000164.1	8019	9824	-	7
			brex_type_I	BrxC	WP_031684509.1	BREX system P-loop protein BrxC [Pseudomonas aeruginosa]	NZ_RXTB01000164.1	9904	13458	-	8
			brex_type_I	BrxB	WP_198082239.1	DUF1788 domain-containing protein [Pseudomonas aeruginosa]	NZ_RXTB01000164.1	13470	14099	-	9
			brex_type_I	BrxA	WP_031684504.1	DUF1819 family protein [Pseudomonas aeruginosa]	NZ_RXTB01000164.1	14123	14734	-	10
			DMS_other	mad1	WP_031684503.1	helix-turn-helix domain-containing protein [Pseudomonas]	NZ_RXTB01000164.1	14727	14930	-	11
			DMS_other	WYL	WP_023115262.1	WYL domain-containing protein [Pseudomonas]	NZ_RXTB01000164.1	18484	19359	+	15
			RosmerTA	RmrA	WP_061363361.1	XRE family transcriptional regulator [Pseudomonas]	NZ_RXTB01000164.1	25201	26307	-	19
			RosmerTA	RmrT	WP_071536843.1	hypothetical protein [Pseudomonas aeruginosa]	NZ_RXTB01000164.1	26304	26972	-	20
			PDC-S27	PDC-S27	WP_221768146.1	hypothetical protein, partial [Pseudomonas aeruginosa]	NZ_RXTB01000164.1	36876	38340	-	32
			DMS_other	MTase_II	WP_021018624.1	site-specific DNA-methyltransferase [Pseudomonas]	NZ_RXTB01000186.1	25480	26760	-	25
			DMS_other	Control_protein	WP_087785415.1	helix-turn-helix domain-containing protein [Pseudomonas]	NZ_RXTB01000186.1	27476	27745	+	27
			Mokosh_TypeI	MkoA	WP_009681705.1	NERD domain-containing protein [Pseudomonas]	NZ_RXTB01000198.1	1274	6232	+	2
			Mokosh_TypeI	MkoB	WP_009681706.1	hypothetical protein [Pseudomonas]	NZ_RXTB01000198.1	6225	7781	+	3
			PDC-M30	PDC-M30B	WP_003131934.1	phage Gp37/Gp68 family protein [Pseudomonas]	NZ_RXTB01000200.1	4816	5559	+	7
			PDC-M30	PDC-M30A	WP_003131931.1	three-Cys-motif partner protein TcmP [Pseudomonas]	NZ_RXTB01000200.1	5582	6901	+	8
			CRISPR_array	CRISPR_array	CRISPR001	CRISPR001; repeat=GTTCACTGCCGTATAGGCAGCTAAGAAA; score=6.06	NZ_RXTB01000210.1	343	611	-	0.01
		8915	ietAS	IetS	WP_159426440.1	S8 family peptidase [Pseudomonas aeruginosa]	NZ_RXTA01000009.1	11968	14367	-	15	28	20
			ietAS	IetA	WP_071536761.1	AAA family ATPase [Pseudomonas aeruginosa]	NZ_RXTA01000009.1	14578	15582	-	16
			PDC-S06	PDC-S06	WP_010794466.1	AAA family ATPase [Pseudomonas]	NZ_RXTA01000012.1	17504	20119	+	23
			DMS_other	BrxC	WP_025297447.1	BREX system P-loop protein BrxC [Pseudomonas]	NZ_RXTA01000013.1	159	3713	-	1
			DMS_other	BrxB	WP_196692495.1	DUF1788 domain-containing protein [Pseudomonas]	NZ_RXTA01000013.1	3725	4354	-	2
			DMS_other	BrxA	WP_025297449.1	DUF1819 family protein [Pseudomonas]	NZ_RXTA01000013.1	4378	4989	-	3
			DMS_other	mad1	WP_025297450.1	helix-turn-helix domain-containing protein [Pseudomonas]	NZ_RXTA01000013.1	4982	5185	-	4
			DMS_other	WYL	WP_033895413.1	WYL domain-containing protein [Pseudomonas]	NZ_RXTA01000013.1	8740	9615	+	8
			RosmerTA	RmrA	WP_025297456.1	XRE family transcriptional regulator [Pseudomonas]	NZ_RXTA01000013.1	13562	14668	-	13
			RosmerTA	RmrT	WP_071534660.1	hypothetical protein [Pseudomonas]	NZ_RXTA01000013.1	14665	15333	-	14
			gabija	GajB	WP_025297468.1	ATP-dependent helicase [Pseudomonas]	NZ_RXTA01000013.1	25937	27604	-	27
			gabija	GajA	WP_033895410.1	AAA family ATPase [Pseudomonas]	NZ_RXTA01000013.1	27601	29553	-	28
			SoFic	SoFic	WP_015649718.1	Fic family protein [Pseudomonas]	NZ_RXTA01000020.1	83556	84677	+	81
			PD-T4-6	PD-T4-6	WP_003097784.1	serine/threonine protein kinase [Pseudomonas]	NZ_RXTA01000033.1	127752	128741	+	118
			cbass_type_III	TRIP13	WP_016852809.1	AAA family ATPase [Proteobacteria]	NZ_RXTA01000077.1	63497	64411	+	68
			cbass_type_III	HORMA	WP_003090160.1	hypothetical protein [Proteobacteria]	NZ_RXTA01000077.1	64408	64878	+	69
			cbass_type_III	HORMA	WP_003090159.1	hypothetical protein [Proteobacteria]	NZ_RXTA01000077.1	64875	65375	+	70
			cbass_type_III	Cyclase	WP_003090158.1	nucleotidyltransferase domain-containing protein [Proteobacteria]	NZ_RXTA01000077.1	65375	66277	+	71
			cbass_type_III	Effector	WP_003050273.1	cbass effector endonuclease NucC [Proteobacteria]	NZ_RXTA01000077.1	66316	67041	+	72
			Pycsar_effector	PycC	WP_003127475.1	transcriptional regulator [Pseudomonas]	NZ_RXTA01000089.1	3987	5531	-	4
			Pycsar_effector	PycTIR	WP_010562503.1	nucleotide-binding protein [Pseudomonas]	NZ_RXTA01000089.1	5612	6538	-	5
			RM_type_I	MTase_I	WP_025297869.1	type I restriction-modification system subunit M [Pseudomonas]	NZ_RXTA01000113.1	9897	12287	+	10
			RM_type_I	Specificity_I	WP_033895201.1	restriction endonuclease subunit S [Pseudomonas]	NZ_RXTA01000113.1	12292	13599	+	11
			RM_type_I	REase_I	WP_126574857.1	DEAD/DEAH box helicase family protein [Pseudomonas aeruginosa]	NZ_RXTA01000113.1	15391	18393	+	13
			PDC-S06	PDC-S06	WP_025297808.1	AAA family ATPase [Pseudomonas]	NZ_RXTA01000117.1	33929	36619	-	36
			PDC-M30	PDC-M30A	WP_003111048.1	three-Cys-motif partner protein TcmP [Pseudomonas]	NZ_RXTA01000134.1	7631	8947	-	7
			PDC-M30	PDC-M30B	WP_003111049.1	phage Gp37/Gp68 family protein [Pseudomonas]	NZ_RXTA01000134.1	8969	9712	-	8
			PDC-S65	PDC-S65	WP_025297987.1	SIR2 family protein [Pseudomonas]	NZ_RXTA01000135.1	13002	14783	+	18
			PDC-M06	PDC-M06B	WP_023087034.1	hypothetical protein [Pseudomonas]	NZ_RXTA01000135.1	37003	37527	-	37
			PDC-M06	PDC-M06A	WP_023087033.1	hypothetical protein [Pseudomonas]	NZ_RXTA01000135.1	37532	37807	-	38
			RM_type_II	MTase_II	WP_025297703.1	Eco57I restriction-modification methylase domain-containing protein [Pseudomonas]	NZ_RXTA01000140.1	2054	3721	+	4
			RM_type_II	REase_II	WP_025297704.1	type-2 restriction endonuclease [Pseudomonas]	NZ_RXTA01000140.1	3722	4462	+	5
			3HP	Hp1	WP_025297707.1	hypothetical protein [Pseudomonas]	NZ_RXTA01000140.1	5702	6694	+	8
			3HP	Hp2	WP_071534685.1	hypothetical protein [Pseudomonas]	NZ_RXTA01000140.1	6694	7818	+	9
			3HP	Hp3	WP_071534684.1	hypothetical protein [Pseudomonas]	NZ_RXTA01000140.1	7821	8519	+	10
			PDC-S09	PDC-S09	WP_001247892.1	nucleotidyltransferase [Bacteria]	NZ_RXTA01000145.1	12817	13107	+	14
			cas_type_IV-A	typeIV_Cas5	WP_031634023.1	hypothetical protein [Pseudomonas aeruginosa]	NZ_RXTA01000152.1	19446	20081	-	21
			cas_type_IV-A	typeIV_Cas7	WP_023100586.1	type IV CRISPR-associated protein Csf2 [Pseudomonas aeruginosa]	NZ_RXTA01000152.1	20103	21146	-	22
			cas_type_IV-A	typeIV_Cas8	WP_023100585.1	CRISPR type aferr-associated protein csf1 [Pseudomonas aeruginosa]	NZ_RXTA01000152.1	21146	21937	-	23
			cas_type_IV-A	typeIV_Cas6	WP_023100584.1	hypothetical protein [Pseudomonas aeruginosa]	NZ_RXTA01000152.1	21930	22655	-	24
			cas_type_IV-A	typeIV_DinG	WP_023100583.1	CRISPR type aferr-associated dead/deah-box helicase csf4 [Pseudomonas aeruginosa]	NZ_RXTA01000152.1	22744	24918	+	25
			DMS_other	REase_I	WP_025297899.1	type I restriction endonuclease subunit R [Pseudomonas]	NZ_RXTA01000158.1	131	3232	-	1
			zorya_type_I	ZorD1	WP_015649020.1	DEAD/DEAH box helicase [Pseudomonas]	NZ_RXTA01000158.1	7481	10732	-	4
			zorya_type_I	ZorC1	WP_015649021.1	hypothetical protein [Pseudomonas]	NZ_RXTA01000158.1	10732	12375	-	5
			zorya_type_I	ZorB1	WP_015649022.1	OmpA family protein [Pseudomonas]	NZ_RXTA01000158.1	12376	13113	-	6
			zorya_type_I	ZorA1	WP_025297974.1	anti-phage defense ZorAB system protein ZorA [Pseudomonas]	NZ_RXTA01000158.1	13127	15322	-	7
			DMS_other	Specificity_I	WP_015649024.1	restriction endonuclease subunit S [Pseudomonas]	NZ_RXTA01000158.1	15473	16840	-	8
			DMS_other	MTase_I	WP_015649025.1	type I restriction-modification system subunit M [Pseudomonas]	NZ_RXTA01000158.1	16830	18755	-	9
			DMS_other	BrxL	WP_033895418.1	BREX system Lon protease-like protein BrxL [Pseudomonas]	NZ_RXTA01000158.1	21142	23238	-	11
			DMS_other	PglZ	WP_025298035.1	BREX-1 system phosphatase PglZ type A [Pseudomonas]	NZ_RXTA01000158.1	23251	25758	-	12
			HEC-05	HEC-05	WP_025298036.1	DUF262 domain-containing protein [Pseudomonas]	NZ_RXTA01000158.1	25755	27626	-	13
			DMS_other	PglX	WP_197270530.1	BREX-1 system adenine-specific DNA-methyltransferase PglX [Pseudomonas]	NZ_RXTA01000158.1	27630	29381	-	14
			DRT_class_III	RT_UG5-nitrilase	WP_079379923.1	Reverse transcriptase [Pseudomonas]	NZ_RXTA01000158.1	29408	31906	-	15
			HEC-02	HEC-02B	WP_025297775.1	hypothetical protein [Pseudomonas]	NZ_RXTA01000158.1	32425	32982	-	16
			HEC-02	HEC-02A	WP_025297774.1	ATP-binding protein [Pseudomonas]	NZ_RXTA01000158.1	32982	34121	-	17
			DMS_other	PglX	WP_126574891.1	BREX-1 system adenine-specific DNA-methyltransferase PglX, partial [Pseudomonas aeruginosa]	NZ_RXTA01000158.1	34118	35870	-	18
			DMS_other	WYL	WP_023094261.1	WYL domain-containing protein [Pseudomonas]	NZ_RXTA01000159.1	9661	10536	-	10
			RM_type_I	REase_I	WP_012077898.1	DEAD/DEAH box helicase family protein [Pseudomonas]	NZ_RXTA01000159.1	12060	14426	+	13
			RM_type_I	MTase_I	WP_012077896.1	type I restriction-modification system subunit M [Pseudomonas]	NZ_RXTA01000159.1	15787	17256	+	15
			RM_type_I	Specificity_I	WP_012077895.1	restriction endonuclease subunit S [Pseudomonas]	NZ_RXTA01000159.1	17253	18896	+	16
			PDC-S11	PDC-S11	WP_012077894.1	endonuclease NucS [Pseudomonas]	NZ_RXTA01000159.1	18914	19990	+	17
			zorya_type_I	ZorA1	WP_012077893.1	anti-phage defense ZorAB system protein ZorA [Pseudomonas]	NZ_RXTA01000159.1	20043	22169	+	18
			zorya_type_I	ZorB1	WP_012077892.1	OmpA family protein [Pseudomonas]	NZ_RXTA01000159.1	22169	22933	+	19
			zorya_type_I	ZorC1	WP_023096322.1	hypothetical protein [Pseudomonas]	NZ_RXTA01000159.1	22930	24942	+	20
			zorya_type_I	ZorD1	WP_126574893.1	DEAD/DEAH box helicase family protein, partial [Pseudomonas aeruginosa]	NZ_RXTA01000159.1	24943	27302	+	21
			PDC-S02	PDC-S02	WP_221767920.1	PDDEXK nuclease domain-containing protein [Pseudomonas aeruginosa]	NZ_RXTA01000162.1	4314	5330	-	7
		9718	SoFic	SoFic	WP_031686357.1	Fic family protein [Pseudomonas aeruginosa]	NZ_RXSZ01000009.1	56609	57730	-	67	11	27.14
			PD-T7-1or5	PD-T7-1	WP_052151016.1	hypothetical protein [Pseudomonas aeruginosa]	NZ_RXSZ01000038.1	1342	2709	-	5
			cbass_type_III	TRIP13	WP_016852809.1	AAA family ATPase [Proteobacteria]	NZ_RXSZ01000049.1	62635	63549	+	68
			cbass_type_III	HORMA	WP_003090160.1	hypothetical protein [Proteobacteria]	NZ_RXSZ01000049.1	63546	64016	+	69
			cbass_type_III	HORMA	WP_003090159.1	hypothetical protein [Proteobacteria]	NZ_RXSZ01000049.1	64013	64513	+	70
			cbass_type_III	Cyclase	WP_003090158.1	nucleotidyltransferase domain-containing protein [Proteobacteria]	NZ_RXSZ01000049.1	64513	65415	+	71
			cbass_type_III	Effector	WP_003050273.1	cbass effector endonuclease NucC [Proteobacteria]	NZ_RXSZ01000049.1	65454	66179	+	72
			PD-T4-6	PD-T4-6	WP_121195637.1	serine/threonine protein kinase [Pseudomonas aeruginosa]	NZ_RXSZ01000057.1	20558	21547	+	18
			DUF4238	DUF4238-Pers	WP_205588418.1	DUF4238 domain-containing protein [Pseudomonas aeruginosa]	NZ_RXSZ01000064.1	4147	5073	+	4
			cbass_type_II	Effector	WP_031300006.1	3'-5' exonuclease [Pseudomonas aeruginosa]	NZ_RXSZ01000118.1	71438	71986	+	65
			cbass_type_II	JAB	WP_021263329.1	Mov34/MPN/PAD-1 family protein [Pseudomonas aeruginosa]	NZ_RXSZ01000118.1	71983	72474	-	66
			cbass_type_II	E1-E2	WP_031656630.1	ThiF family adenylyltransferase [Pseudomonas aeruginosa]	NZ_RXSZ01000118.1	72471	74255	-	67
			cbass_type_II	Cyclase	WP_031656629.1	nucleotidyltransferase [Pseudomonas aeruginosa]	NZ_RXSZ01000118.1	74239	75489	-	68
			cbass_type_II	Effector	WP_023082129.1	SAVED domain-containing protein [Pseudomonas aeruginosa]	NZ_RXSZ01000118.1	75489	76664	-	69
			CRISPR_array	CRISPR_array	CRISPR001	CRISPR001; repeat=GTTCACTGCCGTATAGGCAGCTAAGAAA; score=6.26	NZ_RXSZ01000133.1	31	538	+	0.01
			CRISPR_array	CRISPR_array	CRISPR002	CRISPR002; repeat=GTTCACTGCCGTATAGGCAGCTAAGAAA; score=6.17	NZ_RXSZ01000134.1	55	1103	+	0.01
			cas_type_I-F1	Cas6f	WP_121335208.1	type I-F CRISPR-associated endoribonuclease Cas6/Csy4 [Pseudomonas aeruginosa]	NZ_RXSZ01000134.1	1227	1790	-	1
			cas_type_I-F1	Cas7f	WP_023116494.1	type I-F CRISPR-associated protein Csy3 [Pseudomonas aeruginosa]	NZ_RXSZ01000134.1	1794	2822	-	2
			cas_type_I-F1	Cas5f	WP_003116910.1	type I-F CRISPR-associated protein Csy2 [Pseudomonas]	NZ_RXSZ01000134.1	2833	3816	-	3
			cas_type_I-F1	Cas8f	WP_033994843.1	type I-F CRISPR-associated protein Csy1 [Pseudomonas aeruginosa]	NZ_RXSZ01000134.1	3803	5104	-	4
			cas_type_I-F1	Cas23f	WP_121335207.1	type I-F CRISPR-associated helicase Cas3f [Pseudomonas aeruginosa]	NZ_RXSZ01000134.1	5515	8745	-	5
			cas_type_I-F1	Cas1f	WP_121335206.1	type I-F CRISPR-associated endonuclease Cas1f [Pseudomonas aeruginosa]	NZ_RXSZ01000134.1	8742	9716	-	6
			CRISPR_array	CRISPR_array	CRISPR003	CRISPR003; repeat=GTTCACTGCCGTGTAGGCAGCTAAGAAA; score=6.25	NZ_RXSZ01000134.1	9977	11325	-	6.02
			gabija	GajA	WP_031653030.1	AAA family ATPase [Pseudomonas]	NZ_RXSZ01000137.1	34313	36667	+	37
			gabija	GajB	WP_031653032.1	UvrD-helicase domain-containing protein [Pseudomonas]	NZ_RXSZ01000137.1	36664	38616	+	38
			DMS_other	Specificity_I	WP_042928402.1	hypothetical protein [Pseudomonas]	NZ_RXSZ01000137.1	38746	39012	-	40
			DMS_other	MTase_I	pseudo_subWP_003152710.1	type I restriction-modification system subunit M [Pseudomonas aeruginosa]	NZ_RXSZ01000137.1	39009	39695	-	41
			PDC-S06	PDC-S06	WP_023082108.1	AAA family ATPase [Pseudomonas aeruginosa]	NZ_RXSZ01000169.1	72	2687	-	1
			PD-Lambda-5	PD-Lambda-5_B	WP_071536658.1	DNA adenine methylase [Pseudomonas aeruginosa]	NZ_RXSZ01000195.1	857	1717	+	2
			PD-Lambda-5	PD-Lambda-5_A	WP_023129333.1	hypothetical protein [Pseudomonas aeruginosa]	NZ_RXSZ01000195.1	1718	2965	-	3
		9873	PDC-S02	PDC-S02	WP_003139037.1	PDDEXK nuclease domain-containing protein [Proteobacteria]	NZ_RXSY01000004.1	61203	62366	+	52	26	4.29
			retron_III-A	PRTase_III-A	WP_062842770.1	hypothetical protein [Pseudomonas aeruginosa]	NZ_RXSY01000013.1	38220	39488	+	37
			retron_III-A	msr-msd	NA	msr-msd identified by match to covariance model: TypeIIIA3	NZ_RXSY01000013.1	39427	39671	+	37.011
			retron_III-A	RT_III-A	WP_062842771.1	reverse transcriptase family protein [Pseudomonas aeruginosa]	NZ_RXSY01000013.1	39650	40816	+	38
			Ppl	Ppl	WP_062842772.1	AAA family ATPase [Pseudomonas aeruginosa]	NZ_RXSY01000013.1	42403	45210	-	41
			CRISPR_array	CRISPR_array	CRISPR001	CRISPR001; repeat=GTTCACTGCCGTATAGGCAGCTAAGAAA; score=6.26	NZ_RXSY01000021.1	49278	50445	+	45.01
			AbiU	AbiU	WP_079767456.1	AIPR family protein [Pseudomonas aeruginosa]	NZ_RXSY01000028.1	48065	50011	+	46
			AbiE	AbiEi	WP_062842717.1	type IV toxin-antitoxin system AbiEi family antitoxin domain-containing protein [Pseudomonas aeruginosa]	NZ_RXSY01000035.1	6422	7180	+	9
			AbiE	AbiEii	WP_062842718.1	nucleotidyl transferase AbiEii/AbiGii toxin family protein [Pseudomonas aeruginosa]	NZ_RXSY01000035.1	7173	8093	+	10
			HEC-06	HEC-06	WP_079767507.1	DUF262 domain-containing HNH endonuclease family protein [Pseudomonas aeruginosa]	NZ_RXSY01000046.1	15510	17396	+	20
			RM_type_IV	mREase_IV	WP_079767507.1	DUF262 domain-containing HNH endonuclease family protein [Pseudomonas aeruginosa]	NZ_RXSY01000046.1	15510	17396	+	20
			PDC-S02	PDC-S02	WP_003092331.1	PDDEXK nuclease domain-containing protein [Proteobacteria]	NZ_RXSY01000050.1	2208	3272	-	3
			PDC-M30	PDC-M30B	WP_003131934.1	phage Gp37/Gp68 family protein [Pseudomonas]	NZ_RXSY01000058.1	42124	42867	+	47
			PDC-M30	PDC-M30A	WP_003131931.1	three-Cys-motif partner protein TcmP [Pseudomonas]	NZ_RXSY01000058.1	42890	44209	+	48
			DMS_other	WYL	WP_023094261.1	WYL domain-containing protein [Pseudomonas]	NZ_RXSY01000070.1	54	929	-	1
			RM_type_I	REase_I	WP_012077898.1	DEAD/DEAH box helicase family protein [Pseudomonas]	NZ_RXSY01000070.1	2453	4819	+	4
			RM_type_I	MTase_I	WP_012077896.1	type I restriction-modification system subunit M [Pseudomonas]	NZ_RXSY01000070.1	6180	7649	+	6
			RM_type_I	Specificity_I	WP_012077895.1	restriction endonuclease subunit S [Pseudomonas]	NZ_RXSY01000070.1	7646	9289	+	7
			PDC-S11	PDC-S11	WP_012077894.1	endonuclease NucS [Pseudomonas]	NZ_RXSY01000070.1	9307	10383	+	8
			zorya_other	ZorB	WP_012077892.1	OmpA family protein [Pseudomonas]	NZ_RXSY01000071.1	107	871	+	1
			zorya_other	ZorC	WP_023096322.1	hypothetical protein [Pseudomonas]	NZ_RXSY01000071.1	868	2880	+	2
			zorya_other	ZorD	pseudo_subWP_014819831.1	DEAD/DEAH box helicase [Pseudomonas stutzeri]	NZ_RXSY01000071.1	2881	4858	+	3
			PDC-S06	PDC-S06	WP_010794466.1	AAA family ATPase [Pseudomonas]	NZ_RXSY01000072.1	2934	5549	-	3
			septu_type_I	PtuB1	WP_073656884.1	hypothetical protein [Pseudomonas aeruginosa]	NZ_RXSY01000077.1	890	1726	-	2
			PDC-M01	PDC-M01B	WP_073656884.1	hypothetical protein [Pseudomonas aeruginosa]	NZ_RXSY01000077.1	890	1726	-	2
			septu_type_I	PtuA1	WP_058013160.1	AAA family ATPase [Pseudomonas aeruginosa]	NZ_RXSY01000077.1	1723	3258	-	3
			PDC-M01	PDC-M01A	WP_058013160.1	AAA family ATPase [Pseudomonas aeruginosa]	NZ_RXSY01000077.1	1723	3258	-	3
			brex_type_II	BrxHI	WP_058013163.1	DEAD/DEAH box helicase [Pseudomonas aeruginosa]	NZ_RXSY01000077.1	4763	6874	-	6
			brex_type_II	BrxD	WP_025242137.1	BREX system ATP-binding protein BrxD [Pseudomonas]	NZ_RXSY01000077.1	6899	8218	-	7
			brex_type_II	PglZ	WP_058013164.1	BREX-2 system phosphatase PglZ [Pseudomonas aeruginosa]	NZ_RXSY01000077.1	8234	11023	-	8
			brex_type_II	BrxC	WP_058013165.1	hypothetical protein [Pseudomonas aeruginosa]	NZ_RXSY01000077.1	11028	14705	-	9
			brex_type_II	PglX	WP_124136765.1	BREX-2 system adenine-specific DNA-methyltransferase PglX [Pseudomonas aeruginosa]	NZ_RXSY01000077.1	14722	18414	-	10
			brex_type_II	PglW	WP_062842558.1	BREX system serine/threonine kinase PglW [Pseudomonas aeruginosa]	NZ_RXSY01000077.1	18458	22639	-	11
			PDC-S02	PDC-S02	WP_004883035.1	PDDEXK nuclease domain-containing protein [Proteobacteria]	NZ_RXSY01000083.1	13989	15056	+	16
			gabija	GajB	WP_004883039.1	ATP-dependent helicase [Proteobacteria]	NZ_RXSY01000083.1	16832	18631	-	18
			gabija	GajA	WP_004883041.1	AAA family ATPase [Proteobacteria]	NZ_RXSY01000083.1	18634	20772	-	19
			shedu	SduA	WP_004883043.1	DUF4263 domain-containing protein [Proteobacteria]	NZ_RXSY01000083.1	20878	22287	-	20
			AbiD	AbiD	WP_003463558.1	Abi family protein [Pseudomonas aeruginosa group]	NZ_RXSY01000085.1	31038	31955	-	37
			DMS_other	mad1	WP_003141001.1	helix-turn-helix domain-containing protein [Proteobacteria]	NZ_RXSY01000091.1	12839	13039	+	16
			DMS_other	DrmD	WP_031641639.1	DEAD/DEAH box helicase [Proteobacteria]	NZ_RXSY01000091.1	13098	15977	+	17
			ietAS	IetA	WP_062842690.1	AAA family ATPase [Pseudomonas aeruginosa]	NZ_RXSY01000091.1	16058	17044	+	18
			ietAS	IetS	WP_062842689.1	S8 family peptidase [Pseudomonas aeruginosa]	NZ_RXSY01000091.1	17209	19401	+	19
			RM_type_III	MTase_III	WP_062842688.1	site-specific DNA-methyltransferase [Pseudomonas aeruginosa]	NZ_RXSY01000091.1	19419	21113	+	20
			RM_type_III	REase_III	WP_062842687.1	DEAD/DEAH box helicase family protein [Pseudomonas aeruginosa]	NZ_RXSY01000091.1	21113	23848	+	21
			PDC-S46	PDC-S46	WP_023116011.1	hypothetical protein [Pseudomonas]	NZ_RXSY01000105.1	210	2375	-	1
			SoFic	SoFic	WP_003113218.1	Fic family protein [Pseudomonas]	NZ_RXSY01000105.1	7247	8368	-	4
			druantia_type_II	DruM2	WP_108201907.1	DNA (cytosine-5-)-methyltransferase [Pseudomonas aeruginosa]	NZ_RXSY01000108.1	1689	2888	+	3
			druantia_type_II	DruF2	WP_058167333.1	hypothetical protein [Pseudomonas aeruginosa]	NZ_RXSY01000108.1	3172	5712	+	4
			druantia_type_II	DruG2	WP_031692137.1	hypothetical protein [Pseudomonas aeruginosa]	NZ_RXSY01000108.1	5741	7834	+	5
			druantia_type_II	DruE2	WP_031692138.1	DEAD/DEAH box helicase [Pseudomonas aeruginosa]	NZ_RXSY01000108.1	7847	13717	+	6
			gabija	GajB	WP_126633723.1	UvrD-helicase domain-containing protein [Pseudomonas aeruginosa]	NZ_RXSY01000118.1	2093	4093	-	4
			gabija	GajA	WP_062842633.1	AAA family ATPase [Pseudomonas aeruginosa]	NZ_RXSY01000118.1	4090	6252	-	5
		11278	DRT_type_III	Drt3b	WP_126559108.1	RNA-directed DNA polymerase [Pseudomonas aeruginosa]	NZ_RXWS01000002.1	74278	76248	-	74	21	4.29
			DRT_type_III	Drt3a	WP_126428221.1	RNA-directed DNA polymerase [Pseudomonas aeruginosa]	NZ_RXWS01000002.1	76245	77576	-	75
			CRISPR_array	CRISPR_array	CRISPR001	CRISPR001; repeat=GTGTTCCCCACGGGTGTGGGGATGAACCG; score=6.15	NZ_RXWS01000003.1	107509	108392	+	97.01
			cas_type_I-E	Cas3e	WP_126559128.1	CRISPR-associated helicase Cas3' [Pseudomonas aeruginosa]	NZ_RXWS01000003.1	109118	111817	+	99
			cas_type_I-E	Cas8e	WP_023088946.1	type I-E CRISPR-associated protein Cse1/CasA [Pseudomonas aeruginosa]	NZ_RXWS01000003.1	112179	113747	+	100
			cas_type_I-E	Cas11e	WP_034005191.1	type I-E CRISPR-associated protein Cse2/CasB [Pseudomonas aeruginosa]	NZ_RXWS01000003.1	113744	114274	+	101
			cas_type_I-E	Cas7e	WP_003159830.1	type I-E CRISPR-associated protein Cas7/Cse4/CasC [Pseudomonas aeruginosa]	NZ_RXWS01000003.1	114284	115426	+	102
			cas_type_I-E	Cas5e	WP_004348746.1	type I-E CRISPR-associated protein Cas5/CasD [Pseudomonas]	NZ_RXWS01000003.1	115428	116090	+	103
			cas_type_I-E	Cas6e	WP_126559129.1	type I-E CRISPR-associated protein Cas6/Cse3/CasE [Pseudomonas aeruginosa]	NZ_RXWS01000003.1	116065	116676	+	104
			cas_type_I-E	Cas1e	WP_185833214.1	type I-E CRISPR-associated endonuclease Cas1e [Pseudomonas aeruginosa]	NZ_RXWS01000003.1	116676	117593	+	105
			cas_type_I-E	Cas2e	WP_003159837.1	type I-E CRISPR-associated endoribonuclease Cas2 [Pseudomonas]	NZ_RXWS01000003.1	117590	117889	+	106
			CRISPR_array	CRISPR_array	CRISPR002	CRISPR002; repeat=GTGTTCCCCACATGCGTGGGGATGAACCG; score=6.26	NZ_RXWS01000003.1	117954	118288	+	106.02
			PD-T4-6	PD-T4-6	WP_003140077.1	serine/threonine protein kinase [Pseudomonas]	NZ_RXWS01000012.1	122774	123763	+	114
			cbass_type_III	Effector	WP_043555297.1	cbass effector endonuclease NucC [Proteobacteria]	NZ_RXWS01000032.1	107182	107907	-	104
			cbass_type_III	Cyclase	WP_003090158.1	nucleotidyltransferase domain-containing protein [Proteobacteria]	NZ_RXWS01000032.1	107946	108848	-	105
			cbass_type_III	HORMA	WP_003090159.1	hypothetical protein [Proteobacteria]	NZ_RXWS01000032.1	108848	109348	-	106
			cbass_type_III	HORMA	WP_126559340.1	hypothetical protein [Pseudomonas aeruginosa]	NZ_RXWS01000032.1	109345	109815	-	107
			cbass_type_III	TRIP13	WP_016852809.1	AAA family ATPase [Proteobacteria]	NZ_RXWS01000032.1	109812	110726	-	108
			RM_type_I	REase_I	WP_033987219.1	type I restriction-modification system endonuclease [Pseudomonas aeruginosa]	NZ_RXWS01000036.1	78319	81660	+	74
			RM_type_I	MTase_I	WP_033987222.1	N-6 DNA methylase [Pseudomonas aeruginosa]	NZ_RXWS01000036.1	81737	83281	+	75
			RM_type_I	Specificity_I	WP_071534107.1	restriction endonuclease subunit S [Pseudomonas aeruginosa]	NZ_RXWS01000036.1	83274	84617	+	76
			PDC-S02	PDC-S02	WP_033987225.1	restriction endonuclease [Pseudomonas aeruginosa]	NZ_RXWS01000036.1	84664	85707	+	77
			qatABCD	QatA	WP_024947978.1	KAP family P-loop domain protein [Pseudomonas aeruginosa]	NZ_RXWS01000043.1	77982	79853	+	91
			qatABCD	QatB	WP_199914099.1	hypothetical protein [Pseudomonas aeruginosa]	NZ_RXWS01000043.1	80216	80686	+	92
			qatABCD	QatC	WP_071562108.1	hypothetical protein [Pseudomonas aeruginosa]	NZ_RXWS01000043.1	80683	81948	+	93
			qatABCD	QatD	WP_199914112.1	TatD family hydrolase [Pseudomonas aeruginosa]	NZ_RXWS01000043.1	81948	82709	+	94
			gabija	GajA	WP_024947982.1	AAA family ATPase [Pseudomonas aeruginosa]	NZ_RXWS01000043.1	83450	85012	+	96
			gabija	GajB	WP_024947983.1	AAA family ATPase [Pseudomonas aeruginosa]	NZ_RXWS01000043.1	84997	86031	+	97
			PDC-S02	PDC-S02	WP_126558566.1	PDDEXK nuclease domain-containing protein [Pseudomonas]	NZ_RXWS01000048.1	47	988	+	1
			CRISPR_array	CRISPR_array	CRISPR003	CRISPR003; repeat=GTTCACTGCCGTATAGGCAGCTAAGAAA; score=6.26	NZ_RXWS01000049.1	218	1146	+	1.01
			septu_type_I	PtuA1	WP_126559648.1	AAA family ATPase [Pseudomonas aeruginosa]	NZ_RXWS01000050.1	53734	55119	+	51
			septu_type_I	PtuB1	WP_071557849.1	HNH endonuclease [Pseudomonas aeruginosa]	NZ_RXWS01000050.1	55103	55762	+	52
			PDC-S15	PDC-S15	WP_126559690.1	FRG domain-containing protein [Pseudomonas aeruginosa]	NZ_RXWS01000051.1	23837	24697	+	32
			cbass_type_II	Effector	WP_031300006.1	3'-5' exonuclease [Pseudomonas aeruginosa]	NZ_RXWS01000060.1	3785	4333	+	5
			cbass_type_II	JAB	WP_021263329.1	Mov34/MPN/PAD-1 family protein [Pseudomonas aeruginosa]	NZ_RXWS01000060.1	4330	4821	-	6
			cbass_type_II	E1-E2	WP_031656630.1	ThiF family adenylyltransferase [Pseudomonas aeruginosa]	NZ_RXWS01000060.1	4818	6602	-	7
			cbass_type_II	Cyclase	WP_031656629.1	nucleotidyltransferase [Pseudomonas aeruginosa]	NZ_RXWS01000060.1	6586	7836	-	8
			cbass_type_II	Effector	WP_023082129.1	SAVED domain-containing protein [Pseudomonas aeruginosa]	NZ_RXWS01000060.1	7836	9011	-	9
			wadjet_type_I	JetA1	WP_021263338.1	DUF3375 domain-containing protein [Pseudomonas]	NZ_RXWS01000060.1	10849	12303	+	13
			wadjet_type_I	JetB1	WP_126559794.1	DUF4194 domain-containing protein [Pseudomonas aeruginosa]	NZ_RXWS01000060.1	12300	13055	+	14
			wadjet_type_I	JetC1	WP_031656628.1	AAA family ATPase [Pseudomonas aeruginosa]	NZ_RXWS01000060.1	13048	16434	+	15
			wadjet_type_I	JetD1	WP_023082125.1	DUF3322 domain-containing protein [Pseudomonas aeruginosa]	NZ_RXWS01000060.1	16431	17624	+	16
			PDC-S06	PDC-S06	WP_023082108.1	AAA family ATPase [Pseudomonas aeruginosa]	NZ_RXWS01000060.1	49484	52099	-	47
			SoFic	SoFic	WP_126559840.1	Fic family protein [Pseudomonas aeruginosa]	NZ_RXWS01000065.1	28175	29296	+	25
			hachiman_type_I	HamB1	WP_121425252.1	DEAD/DEAH box helicase [Pseudomonas aeruginosa]	NZ_RXWS01000076.1	2651	5635	-	4
			hachiman_type_I	HamA1	WP_126559987.1	SAVED domain-containing protein [Pseudomonas aeruginosa]	NZ_RXWS01000076.1	5637	6431	-	5
			SoFic	SoFic	WP_045632940.1	Fic family protein [Pseudomonas]	NZ_RXWS01000080.1	24333	25433	+	26
			PDC-M04	PDC-M04A	WP_125877077.1	DUF3800 domain-containing protein [Pseudomonas]	NZ_RXWS01000080.1	37965	38681	+	30
			PDC-M04	PDC-M04B	WP_221761874.1	hypothetical protein [Pseudomonas]	NZ_RXWS01000080.1	38684	39166	+	31
			Lamassu_Family	LmuA	WP_126560364.1	hypothetical protein [Pseudomonas aeruginosa]	NZ_RXWS01000112.1	663	1862	+	2
			Lamassu_Family	LmuC	WP_126560366.1	DUF6521 family protein [Pseudomonas aeruginosa]	NZ_RXWS01000112.1	1862	2368	+	3
			Lamassu_Family	LmuB	WP_126560368.1	DUF3732 domain-containing protein [Pseudomonas aeruginosa]	NZ_RXWS01000112.1	2352	4337	+	4
			PDC-S06	PDC-S06	WP_126560408.1	AAA family ATPase [Pseudomonas aeruginosa]	NZ_RXWS01000114.1	26024	28288	+	16
			Mokosh_TypeI	MkoA	WP_009681705.1	NERD domain-containing protein [Pseudomonas]	NZ_RXWS01000139.1	1296	6254	+	2
			Mokosh_TypeI	MkoB	WP_009681706.1	hypothetical protein [Pseudomonas]	NZ_RXWS01000139.1	6247	7803	+	3
		11281	CRISPR_array	CRISPR_array	CRISPR001	CRISPR001; repeat=GTTCACTGCCGTATAGGCAGCTAAGAAA; score=6.23	NZ_RXWR01000005.1	141603	141990	-	125.01	6	80
			RosmerTA	RmrT	WP_126565978.1	hypothetical protein [Pseudomonas aeruginosa]	NZ_RXWR01000009.1	168327	168989	+	145
			RosmerTA	RmrA	WP_057386656.1	XRE family transcriptional regulator [Pseudomonas aeruginosa]	NZ_RXWR01000009.1	168986	170095	+	146
			mads	mad7	WP_023089246.1	hypothetical protein [Pseudomonas aeruginosa]	NZ_RXWR01000010.1	6332	8005	-	4
			mads	mad6	WP_023089247.1	serine/threonine protein kinase [Pseudomonas aeruginosa]	NZ_RXWR01000010.1	8005	12153	-	5
			mads	mad5	WP_023089248.1	hypothetical protein [Pseudomonas aeruginosa]	NZ_RXWR01000010.1	12155	13573	-	6
			mads	mad4	WP_023089249.1	hypothetical protein [Pseudomonas aeruginosa]	NZ_RXWR01000010.1	13570	14226	-	7
			mads	mad3	WP_023089250.1	AAA family ATPase [Pseudomonas aeruginosa]	NZ_RXWR01000010.1	14223	15560	-	8
			mads	mad2	WP_023089251.1	N-6 DNA methylase [Pseudomonas aeruginosa]	NZ_RXWR01000010.1	15557	17563	-	9
			mads	mad1	WP_023089252.1	helix-turn-helix domain-containing protein [Pseudomonas aeruginosa]	NZ_RXWR01000010.1	17592	17807	-	10
			CRISPR_array	CRISPR_array	CRISPR002	CRISPR002; repeat=CGCGCCCCGCACGGGCGCGTGGATTGAAAC; score=9.23	NZ_RXWR01000015.1	3588	6334	-	8.01
			cas_type_I-C	Cas2c	WP_019726852.1	CRISPR-associated endonuclease Cas2 [Pseudomonas aeruginosa]	NZ_RXWR01000015.1	6518	6808	-	9
			cas_type_I-C	Cas1c	WP_033985459.1	type I-C CRISPR-associated endonuclease Cas1c [Pseudomonas aeruginosa]	NZ_RXWR01000015.1	6818	7858	-	10
			cas_type_I-C	Cas4c	WP_033985460.1	CRISPR-associated protein Cas4 [Pseudomonas aeruginosa]	NZ_RXWR01000015.1	7862	8494	-	11
			cas_type_I-C	Cas7c	WP_033985462.1	type I-C CRISPR-associated protein Cas7/Csd2 [Pseudomonas aeruginosa]	NZ_RXWR01000015.1	8513	9382	-	12
			cas_type_I-C	Cas8c	WP_033985464.1	type I-C CRISPR-associated protein Cas8c/Csd1 [Pseudomonas aeruginosa]	NZ_RXWR01000015.1	9394	11157	-	13
			cas_type_I-C	Cas5c	WP_023104937.1	type I-C CRISPR-associated protein Cas5c [Pseudomonas aeruginosa]	NZ_RXWR01000015.1	11154	11828	-	14
			cas_type_I-C	Cas3c	WP_185832022.1	CRISPR-associated endonuclease Cas3'' [Pseudomonas aeruginosa]	NZ_RXWR01000015.1	11879	14113	-	15
			PD-T4-6	PD-T4-6	WP_096314790.1	serine/threonine protein kinase [Pseudomonas aeruginosa]	NZ_RXWR01000020.1	178789	179778	+	164
			SoFic	SoFic	WP_023115739.1	Fic family protein [Pseudomonas]	NZ_RXWR01000022.1	330528	331649	-	317
			PDC-S06	PDC-S06	WP_079276263.1	AAA family ATPase [Pseudomonas aeruginosa]	NZ_RXWR01000026.1	2112	4310	-	6
		11285	dsr1	dsr1	WP_074222094.1	SIR2 family protein [Pseudomonas aeruginosa]	NZ_RXWQ01000004.1	401535	405320	-	386	13	55.71
			SoFic	SoFic	WP_074222713.1	Fic family protein [Pseudomonas aeruginosa]	NZ_RXWQ01000004.1	406332	407471	-	388
			RM_type_I	MTase_I	WP_074222716.1	type I restriction-modification system subunit M [Pseudomonas aeruginosa]	NZ_RXWQ01000004.1	409844	411763	+	392
			RM_type_I	Specificity_I	WP_074222717.1	restriction endonuclease subunit S [Pseudomonas aeruginosa]	NZ_RXWQ01000004.1	411760	413103	+	393
			PDC-S14	PDC-S14	WP_074222718.1	GIY-YIG nuclease family protein [Pseudomonas aeruginosa]	NZ_RXWQ01000004.1	413100	414044	+	394
			RM_type_I	REase_I	WP_074222720.1	DEAD/DEAH box helicase family protein [Pseudomonas aeruginosa]	NZ_RXWQ01000004.1	415779	418961	+	396
			RM_type_II	REase_II	WP_043269318.1	XamI family restriction endonuclease [Pseudomonas]	NZ_RXWQ01000004.1	437237	438157	-	418
			RM_type_II	MTase_II	WP_126589874.1	N-6 DNA methylase [Pseudomonas aeruginosa]	NZ_RXWQ01000004.1	438154	439740	-	419
			CRISPR_array	CRISPR_array	CRISPR001	CRISPR001; repeat=GTGTTCCCCACATGCGTGGGGATGAACCG; score=6.08	NZ_RXWQ01000013.1	279742	281053	-	261.01
			cas_type_I-E	Cas2e	WP_003159837.1	type I-E CRISPR-associated endoribonuclease Cas2 [Pseudomonas]	NZ_RXWQ01000013.1	281118	281417	-	262
			cas_type_I-E	Cas1e	WP_031299144.1	type I-E CRISPR-associated endonuclease Cas1e [Pseudomonas aeruginosa]	NZ_RXWQ01000013.1	281414	282331	-	263
			cas_type_I-E	Cas6e	WP_004348749.1	type I-E CRISPR-associated protein Cas6/Cse3/CasE [Pseudomonas]	NZ_RXWQ01000013.1	282331	282942	-	264
			cas_type_I-E	Cas5e	WP_004348746.1	type I-E CRISPR-associated protein Cas5/CasD [Pseudomonas]	NZ_RXWQ01000013.1	282917	283579	-	265
			cas_type_I-E	Cas7e	WP_023106944.1	type I-E CRISPR-associated protein Cas7/Cse4/CasC [Pseudomonas]	NZ_RXWQ01000013.1	283581	284723	-	266
			cas_type_I-E	Cas11e	WP_023106945.1	type I-E CRISPR-associated protein Cse2/CasB [Pseudomonas]	NZ_RXWQ01000013.1	284733	285263	-	267
			cas_type_I-E	Cas8e	WP_023106946.1	type I-E CRISPR-associated protein Cse1/CasA [Pseudomonas]	NZ_RXWQ01000013.1	285260	286828	-	268
			cas_type_I-E	Cas3e	WP_023106947.1	CRISPR-associated helicase/endonuclease Cas3 [Pseudomonas]	NZ_RXWQ01000013.1	286831	289503	-	269
			CRISPR_array	CRISPR_array	CRISPR002	CRISPR002; repeat=GTGTTCCCCACGGGTGTGGGGATGAACCG; score=6.20	NZ_RXWQ01000013.1	290228	291844	-	270.02
			cbass_type_I	Effector	WP_126590008.1	SLATT domain-containing protein [Pseudomonas aeruginosa]	NZ_RXWQ01000014.1	358531	359169	-	310
			cbass_type_I	Cyclase	WP_074222209.1	nucleotidyltransferase [Pseudomonas aeruginosa]	NZ_RXWQ01000014.1	359090	359971	-	311
			cbass_type_I	Effector	pseudo_subWP_004722307.1	SLATT domain-containing protein [Acinetobacter]	NZ_RXWQ01000014.1	360687	361300	-	313
			cbass_type_I	Cyclase	WP_074222211.1	nucleotidyltransferase [Pseudomonas aeruginosa]	NZ_RXWQ01000014.1	361307	362596	-	314
			PD-T4-6	PD-T4-6	WP_023126208.1	serine/threonine protein kinase [Pseudomonas aeruginosa]	NZ_RXWQ01000023.1	250481	251470	-	236
			CRISPR_array	CRISPR_array	CRISPR003	CRISPR003; repeat=GTTCACTGCCGTATAGGCAGCTAAGAAA; score=6.17	NZ_RXWQ01000036.1	36730	37958	+	23.01
			cas_type_I-F1	Cas6f	WP_029610273.1	type I-F CRISPR-associated endoribonuclease Cas6/Csy4 [Pseudomonas aeruginosa]	NZ_RXWQ01000036.1	38082	38645	-	24
			cas_type_I-F1	Cas7f	WP_034029353.1	type I-F CRISPR-associated protein Csy3 [Pseudomonas]	NZ_RXWQ01000036.1	38649	39677	-	25
			cas_type_I-F1	Cas5f	WP_074222015.1	type I-F CRISPR-associated protein Csy2 [Pseudomonas aeruginosa]	NZ_RXWQ01000036.1	39688	40671	-	26
			cas_type_I-F1	Cas8f	WP_023103132.1	type I-F CRISPR-associated protein Csy1 [Pseudomonas]	NZ_RXWQ01000036.1	40658	41959	-	27
			cas_type_I-F1	Cas23f	WP_074222014.1	type I-F CRISPR-associated helicase Cas3f [Pseudomonas aeruginosa]	NZ_RXWQ01000036.1	42370	45600	-	28
			cas_type_I-F1	Cas1f	WP_023103134.1	type I-F CRISPR-associated endonuclease Cas1f [Pseudomonas]	NZ_RXWQ01000036.1	45597	46571	-	29
			CRISPR_array	CRISPR_array	CRISPR004	CRISPR004; repeat=GTTCACTGCCGTGTAGGCAGCTAAGAAA; score=6.26	NZ_RXWQ01000036.1	46832	48361	-	29.02
			PDC-S08	PDC-S08	WP_071534444.1	5'-nucleotidase [Pseudomonas aeruginosa]	NZ_RXWQ01000046.1	47730	48668	+	44
			hachiman_type_I	HamB1	WP_221768294.1	hypothetical protein [Pseudomonas aeruginosa]	NZ_RXWQ01000048.1	35172	36290	-	29
			hachiman_type_I	HamB1	WP_221768295.1	DEAD/DEAH box helicase [Pseudomonas aeruginosa]	NZ_RXWQ01000048.1	36206	38680	-	30
			hachiman_type_I	HamA1	WP_073647259.1	SAVED domain-containing protein [Pseudomonas aeruginosa]	NZ_RXWQ01000048.1	38664	39443	-	31
			DMS_other	DUF1156_MTase	WP_126590169.1	hypothetical protein [Pseudomonas aeruginosa]	NZ_RXWQ01000048.1	43827	45908	-	33
			retron_I-C	RT-Toprim_I-C	WP_074222439.1	reverse transcriptase family protein [Pseudomonas aeruginosa]	NZ_RXWQ01000050.1	854	2530	-	2
			retron_XII	RT-TIR_XII	WP_074222439.1	reverse transcriptase family protein [Pseudomonas aeruginosa]	NZ_RXWQ01000050.1	854	2530	-	2
		11286	PDC-M38	PDC-M38B	WP_126634221.1	hypothetical protein [Pseudomonas aeruginosa]	NZ_RXWP01000010.1	22014	22901	-	25	22	27.14
			PDC-M38	PDC-M38A	WP_079388091.1	AAA family ATPase [Pseudomonas aeruginosa]	NZ_RXWP01000010.1	22901	25093	-	26
			PD-T4-6	PD-T4-6	WP_003097784.1	serine/threonine protein kinase [Pseudomonas]	NZ_RXWP01000016.1	40872	41861	-	55
			PDC-S08	PDC-S08	WP_023090736.1	5'-nucleotidase [Pseudomonas aeruginosa]	NZ_RXWP01000020.1	7890	8828	-	8
			SoFic	SoFic	WP_003113218.1	Fic family protein [Pseudomonas]	NZ_RXWP01000043.1	78004	79125	+	79
			DMS_other	WYL	WP_004350178.1	WYL domain-containing protein [Pseudomonas]	NZ_RXWP01000057.1	48615	49490	-	54
			DMS_other	BrxA	WP_023115266.1	hypothetical protein [Pseudomonas]	NZ_RXWP01000057.1	53735	54592	+	58
			DMS_other	BrxB	WP_023115267.1	hypothetical protein [Pseudomonas]	NZ_RXWP01000057.1	54585	55130	+	59
			DMS_other	BrxC	WP_126634432.1	BREX system P-loop protein BrxC [Pseudomonas aeruginosa]	NZ_RXWP01000057.1	55154	57868	+	60
			DMS_other	PglX	WP_058173020.1	restriction endonuclease subunit M [Pseudomonas aeruginosa]	NZ_RXWP01000057.1	98603	101929	+	118
			PDC-M40	PDC-M40A	WP_023115270.1	SMI1/KNR4 family protein [Pseudomonas]	NZ_RXWP01000057.1	101987	102499	+	119
			PDC-M40	PDC-M40B	WP_058173021.1	hypothetical protein [Pseudomonas aeruginosa]	NZ_RXWP01000057.1	102508	104175	+	120
			PDC-M40	PDC-M40C	WP_023115272.1	hypothetical protein [Pseudomonas]	NZ_RXWP01000057.1	104180	105049	+	121
			HEC-06	HEC-06	WP_058173022.1	DUF262 domain-containing HNH endonuclease family protein [Pseudomonas aeruginosa]	NZ_RXWP01000057.1	105167	106840	+	122
			DMS_other	PglZ	WP_023115274.1	BREX-1 system phosphatase PglZ type B [Pseudomonas]	NZ_RXWP01000057.1	106880	109201	+	123
			DMS_other	BrxL	WP_201023475.1	protease Lon-related BREX system protein BrxL [Pseudomonas aeruginosa]	NZ_RXWP01000057.1	109198	111249	+	124
			PDC-M23	PDC-M23A	WP_012017842.1	hypothetical protein [Pseudomonas]	NZ_RXWP01000057.1	138018	138803	+	152
			PDC-M23	PDC-M23B	WP_126634437.1	DEAD/DEAH box helicase [Pseudomonas aeruginosa]	NZ_RXWP01000057.1	138800	141970	+	153
			PDC-S06	PDC-S06	WP_010794466.1	AAA family ATPase [Pseudomonas]	NZ_RXWP01000088.1	1981	4596	+	4
			gabija	GajA	WP_021263744.1	AAA family ATPase [Pseudomonas aeruginosa]	NZ_RXWP01000088.1	6483	8294	+	6
			gabija	GajB	WP_033987076.1	UvrD-helicase domain-containing protein [Pseudomonas aeruginosa]	NZ_RXWP01000088.1	8294	10057	+	7
			wadjet_type_I	JetD1	WP_023082125.1	DUF3322 domain-containing protein [Pseudomonas aeruginosa]	NZ_RXWP01000088.1	10907	12100	-	9
			wadjet_type_I	JetC1	WP_023082126.1	AAA family ATPase [Pseudomonas aeruginosa]	NZ_RXWP01000088.1	12097	15483	-	10
			wadjet_type_I	JetB1	WP_021263339.1	DUF4194 domain-containing protein [Pseudomonas aeruginosa]	NZ_RXWP01000088.1	15476	16231	-	11
			wadjet_type_I	JetA1	WP_021263338.1	DUF3375 domain-containing protein [Pseudomonas]	NZ_RXWP01000088.1	16228	17682	-	12
			cbass_type_II	Effector	WP_023082129.1	SAVED domain-containing protein [Pseudomonas aeruginosa]	NZ_RXWP01000088.1	19520	20695	+	16
			cbass_type_II	Cyclase	WP_126634542.1	nucleotidyltransferase [Pseudomonas aeruginosa]	NZ_RXWP01000088.1	20695	21945	+	17
			cbass_type_II	E1-E2	WP_031656630.1	ThiF family adenylyltransferase [Pseudomonas aeruginosa]	NZ_RXWP01000088.1	21929	23713	+	18
			cbass_type_II	JAB	WP_021263329.1	Mov34/MPN/PAD-1 family protein [Pseudomonas aeruginosa]	NZ_RXWP01000088.1	23710	24201	+	19
			cbass_type_II	Effector	WP_031300006.1	3'-5' exonuclease [Pseudomonas aeruginosa]	NZ_RXWP01000088.1	24198	24746	-	20
			cbass_type_II	Effector	WP_108202062.1	hypothetical protein [Pseudomonas aeruginosa]	NZ_RXWP01000116.1	33955	34620	+	49
			cbass_type_II	Cyclase	WP_108202061.1	hypothetical protein [Pseudomonas aeruginosa]	NZ_RXWP01000116.1	34874	36055	+	50
			cbass_type_II	E1-E2	WP_126634644.1	ThiF family adenylyltransferase [Pseudomonas aeruginosa]	NZ_RXWP01000116.1	36062	37678	+	51
			cbass_type_II	JAB	WP_071533988.1	Mov34/MPN/PAD-1 family protein [Pseudomonas aeruginosa]	NZ_RXWP01000116.1	37666	38136	+	52
			hma	hmaC	WP_126634673.1	DUF499 domain-containing protein [Pseudomonas aeruginosa]	NZ_RXWP01000123.1	2542	5373	-	5
			PsyrTA	PsyrA	WP_126634674.1	DNA-processing protein DprA [Pseudomonas aeruginosa]	NZ_RXWP01000123.1	5393	6754	-	6
			PsyrTA	PsyrT	WP_126634675.1	RecQ family ATP-dependent DNA helicase [Pseudomonas aeruginosa]	NZ_RXWP01000123.1	6751	8847	-	7
			hma	hmaB	WP_126634676.1	DUF1156 domain-containing protein [Pseudomonas aeruginosa]	NZ_RXWP01000123.1	8889	11786	-	8
			septu_type_I	PtuB1	WP_126634677.1	TIGR02646 family protein [Pseudomonas]	NZ_RXWP01000123.1	11795	12385	-	9
			DMS_other	mad3	WP_126634678.1	AAA family ATPase [Pseudomonas]	NZ_RXWP01000123.1	12378	13688	-	10
			septu_type_I	PtuA1	WP_126634678.1	AAA family ATPase [Pseudomonas]	NZ_RXWP01000123.1	12378	13688	-	10
			hma	hmaA	WP_126634679.1	DUF3883 domain-containing protein [Pseudomonas aeruginosa]	NZ_RXWP01000123.1	13685	17218	-	11
			Lamassu_Family	LmuA	WP_023092912.1	hypothetical protein [Pseudomonas aeruginosa]	NZ_RXWP01000123.1	26920	28143	+	20
			Lamassu_Family	LmuC	WP_023094350.1	DUF6521 family protein [Pseudomonas aeruginosa]	NZ_RXWP01000123.1	28140	28628	+	21
			Lamassu_Family	LmuB	WP_023092910.1	DUF3732 domain-containing protein [Pseudomonas aeruginosa]	NZ_RXWP01000123.1	28625	30580	+	22
			AbiE	AbiEi	WP_094953943.1	DUF6088 family protein [Pseudomonas aeruginosa]	NZ_RXWP01000141.1	251	670	+	1
			AbiE	AbiEii	WP_094953944.1	nucleotidyl transferase AbiEii/AbiGii toxin family protein [Pseudomonas aeruginosa]	NZ_RXWP01000141.1	639	1727	+	2
			retron_III-A	RT_III-A	WP_059349515.1	reverse transcriptase family protein [Pseudomonas aeruginosa]	NZ_RXWP01000141.1	9299	10465	-	8
			retron_III-A	msr-msd	NA	msr-msd identified by match to covariance model: TypeIIIA3	NZ_RXWP01000141.1	10444	10676	-	8.011
			retron_III-A	PRTase_III-A	WP_059349516.1	hypothetical protein [Pseudomonas aeruginosa]	NZ_RXWP01000141.1	10627	11895	-	9
			shedu	SduA	WP_158699610.1	DUF4263 domain-containing protein [Pseudomonas]	NZ_RXWP01000148.1	212	1372	-	2
		11536	PDC-S02	PDC-S02	WP_126634141.1	PDDEXK nuclease domain-containing protein [Pseudomonas aeruginosa]	NZ_RXWO01000007.1	42	983	+	1	28	5.71
			PDC-M30	PDC-M30A	WP_003131866.1	three-Cys-motif partner protein TcmP [Pseudomonas]	NZ_RXWO01000010.1	53968	55284	-	61
			PDC-M30	PDC-M30B	WP_003111049.1	phage Gp37/Gp68 family protein [Pseudomonas]	NZ_RXWO01000010.1	55306	56049	-	62
			SoFic	SoFic	WP_024928366.1	Fic family protein [Pseudomonas aeruginosa]	NZ_RXWO01000021.1	104962	106083	-	115
			cbass_type_III	Effector	WP_003050273.1	cbass effector endonuclease NucC [Proteobacteria]	NZ_RXWO01000024.1	104843	105568	-	101
			cbass_type_III	Cyclase	WP_003090158.1	nucleotidyltransferase domain-containing protein [Proteobacteria]	NZ_RXWO01000024.1	105607	106509	-	102
			cbass_type_III	HORMA	WP_003090159.1	hypothetical protein [Proteobacteria]	NZ_RXWO01000024.1	106509	107009	-	103
			cbass_type_III	HORMA	WP_003090160.1	hypothetical protein [Proteobacteria]	NZ_RXWO01000024.1	107006	107476	-	104
			cbass_type_III	TRIP13	WP_016852809.1	AAA family ATPase [Proteobacteria]	NZ_RXWO01000024.1	107473	108387	-	105
			PD-T4-6	PD-T4-6	WP_003097784.1	serine/threonine protein kinase [Pseudomonas]	NZ_RXWO01000025.1	20386	21375	+	17
			wadjet_type_I	JetA1	WP_071535102.1	DUF3375 domain-containing protein [Pseudomonas aeruginosa]	NZ_RXWO01000087.1	31669	33168	+	33
			wadjet_type_I	JetB1	WP_003119440.1	DUF4194 domain-containing protein [Pseudomonas aeruginosa]	NZ_RXWO01000087.1	33171	33920	+	34
			wadjet_type_I	JetC1	WP_023129101.1	hypothetical protein [Pseudomonas aeruginosa]	NZ_RXWO01000087.1	33917	37222	+	35
			wadjet_type_I	JetD1	WP_010792099.1	DUF2220 family protein [Pseudomonas]	NZ_RXWO01000087.1	37206	38387	+	36
			argonaute_type_III	PprPIWI	WP_071580312.1	RNaseH domain-containing protein [Pseudomonas aeruginosa]	NZ_RXWO01000087.1	38628	40979	-	37
			argonaute_type_III	PprDinG	WP_043096049.1	hypothetical protein [Pseudomonas aeruginosa]	NZ_RXWO01000087.1	40976	44050	-	38
			argonaute_type_III	PprRE	WP_024928871.1	hypothetical protein [Pseudomonas]	NZ_RXWO01000087.1	44034	45074	-	39
			RM_type_I	REase_I	WP_033937903.1	DEAD/DEAH box helicase family protein [Pseudomonas aeruginosa]	NZ_RXWO01000087.1	57666	61046	+	52
			RM_type_I	MTase_I	WP_003158585.1	type I restriction-modification system subunit M [Pseudomonas]	NZ_RXWO01000087.1	63218	64801	+	54
			RM_type_I	Specificity_I	WP_071536666.1	restriction endonuclease subunit S [Pseudomonas]	NZ_RXWO01000087.1	64810	66006	+	55
			DMS_other	mad3	WP_003158583.1	AAA family ATPase [Pseudomonas]	NZ_RXWO01000087.1	66021	67850	+	56
			druantia_type_III	DruH3	WP_034003998.1	STY4851/ECs_5259 family protein [Pseudomonas aeruginosa]	NZ_RXWO01000087.1	68255	71590	+	58
			druantia_type_III	DruE3	WP_031756414.1	DEAD/DEAH box helicase [Pseudomonas aeruginosa]	NZ_RXWO01000087.1	71583	77918	+	59
			Mokosh_TypeI	MkoA	WP_034002988.1	AAA family ATPase [Pseudomonas aeruginosa]	NZ_RXWO01000087.1	81386	84778	+	64
			Mokosh_TypeI	MkoB	WP_003158575.1	hypothetical protein [Pseudomonas]	NZ_RXWO01000087.1	84762	86252	+	65
			AbiE	AbiEii	WP_003282189.1	nucleotidyl transferase AbiEii/AbiGii toxin family protein [Pseudomonas]	NZ_RXWO01000090.1	2762	3682	-	4
			AbiE	AbiEi	WP_003282187.1	type IV toxin-antitoxin system AbiEi family antitoxin domain-containing protein [Pseudomonas]	NZ_RXWO01000090.1	3675	4433	-	5
			DMS_other	mad1	WP_003141001.1	helix-turn-helix domain-containing protein [Proteobacteria]	NZ_RXWO01000090.1	23577	23777	+	26
			DMS_other	DrmD	WP_013721884.1	DEAD/DEAH box helicase [Proteobacteria]	NZ_RXWO01000090.1	23836	26715	+	27
			ietAS	IetA	WP_003141003.1	AAA family ATPase [Proteobacteria]	NZ_RXWO01000090.1	26796	27782	+	28
			ietAS	IetS	WP_013721883.1	S8 family peptidase [Proteobacteria]	NZ_RXWO01000090.1	27947	30145	+	29
			RM_type_III	MTase_III	WP_013721881.1	site-specific DNA-methyltransferase [Proteobacteria]	NZ_RXWO01000090.1	31946	33652	+	31
			RM_type_III	REase_III	WP_013721880.1	DEAD/DEAH box helicase family protein [Proteobacteria]	NZ_RXWO01000090.1	33652	36390	+	32
			DMS_other	mad3	WP_062838316.1	AAA family ATPase [Pseudomonas aeruginosa]	NZ_RXWO01000090.1	36501	39128	+	33
			PDC-S06	PDC-S06	WP_062838316.1	AAA family ATPase [Pseudomonas aeruginosa]	NZ_RXWO01000090.1	36501	39128	+	33
			GAO_20	DUF4297	WP_043096213.1	hypothetical protein [Pseudomonas aeruginosa]	NZ_RXWO01000104.1	11875	13083	+	12
			GAO_20	HerA	WP_071580320.1	ATP-binding protein [Pseudomonas aeruginosa]	NZ_RXWO01000104.1	13070	14851	+	13
			HEC-05	HEC-05	WP_200200618.1	DUF262 domain-containing protein [Pseudomonas aeruginosa]	NZ_RXWO01000108.1	19365	20909	-	16
			retron_II-A	RT_II-A	WP_071543143.1	retron St85 family RNA-directed DNA polymerase [Pseudomonas aeruginosa]	NZ_RXWO01000108.1	23274	24227	-	18
			retron_II-A	NDT_II-A	WP_125728842.1	retron St85 family effector protein [Pseudomonas aeruginosa]	NZ_RXWO01000108.1	24224	25171	-	19
			retron_II-A	msr-msd	NA	msr-msd identified by match to covariance model: TypeIA_IIAI	NZ_RXWO01000108.1	25183	25350	-	19.011
			DMS_other	WYL	WP_033982633.1	WYL domain-containing protein [Pseudomonas aeruginosa]	NZ_RXWO01000118.1	6677	7552	-	7
			hma	hmaA	WP_033982637.1	DUF3883 domain-containing protein [Pseudomonas aeruginosa]	NZ_RXWO01000118.1	8471	11995	+	9
			HEC-08	HEC-08	WP_033982638.1	hypothetical protein [Pseudomonas aeruginosa]	NZ_RXWO01000118.1	12153	13208	+	10
			hma	hmaB	WP_033982642.1	DUF1156 domain-containing protein [Pseudomonas aeruginosa]	NZ_RXWO01000118.1	13209	16103	+	11
			HEC-02	HEC-02B	WP_033982643.1	AAA family ATPase [Pseudomonas aeruginosa]	NZ_RXWO01000118.1	16116	17153	+	12
			HEC-02	HEC-02A	WP_062838307.1	hypothetical protein [Pseudomonas aeruginosa]	NZ_RXWO01000118.1	17166	17678	+	13
			hma	hmaC	WP_033982644.1	DUF499 domain-containing protein [Pseudomonas aeruginosa]	NZ_RXWO01000118.1	17686	20514	+	14
			DMS_other	DrmD	pseudo_subWP_011544395.1	IS21-like element ISUnCu3 family helper ATPase IstB [Pseudomonas sp. WS 5011]	NZ_RXWO01000118.1	21389	21745	-	17
			Azaca	ZacC	WP_033982561.1	DEAD/DEAH box helicase [Pseudomonas aeruginosa]	NZ_RXWO01000118.1	32097	35228	-	22
			Azaca	ZacB	WP_033982562.1	phospholipase D family protein [Pseudomonas aeruginosa]	NZ_RXWO01000118.1	35218	37077	-	23
			Azaca	ZacA	WP_049308057.1	DUF6361 family protein [Pseudomonas aeruginosa]	NZ_RXWO01000118.1	37067	38245	-	24
			dynamins	LeoA	WP_033982575.1	50S ribosome-binding GTPase [Pseudomonas aeruginosa]	NZ_RXWO01000118.1	44461	46104	-	33
			dynamins	LeoBC	WP_221769495.1	dynamin family protein [Pseudomonas aeruginosa]	NZ_RXWO01000118.1	46107	47849	-	34
			dynamins	LeoA	WP_033982580.1	50S ribosome-binding GTPase [Pseudomonas aeruginosa]	NZ_RXWO01000118.1	48459	49322	-	36
			Tiamat	TmtA	WP_043096925.1	DUF3883 domain-containing protein [Pseudomonas aeruginosa]	NZ_RXWO01000126.1	10826	15625	-	11
			DMS_other	MTase_I	WP_021204877.1	N-6 DNA methylase [Pseudomonas]	NZ_RXWO01000126.1	17168	19291	+	14
			DMS_other	Specificity_I	WP_023110681.1	hypothetical protein [Pseudomonas]	NZ_RXWO01000126.1	19291	20811	+	15
			CRISPR_array	CRISPR_array	CRISPR001	CRISPR001; repeat=GTTCACTGCCGTATAGGCAGCTAAGAAA; score=6.24	NZ_RXWO01000130.1	25245	25752	+	14.01
			ietAS	IetS	WP_033982315.1	S8 family peptidase [Pseudomonas aeruginosa]	NZ_RXWO01000150.1	173	2500	-	1
			ietAS	IetA	WP_033982317.1	AAA family ATPase [Pseudomonas aeruginosa]	NZ_RXWO01000150.1	2689	3672	-	2
			CRISPR_array	CRISPR_array	CRISPR002	CRISPR002; repeat=GTTCACTGCCGTATAGGCAGCTAAGAAA; score=6.10	NZ_RXWO01000154.1	161	735	+	0.01
			cas_type_I-F1	Cas6f	WP_016254196.1	type I-F CRISPR-associated endoribonuclease Cas6/Csy4 [Pseudomonas]	NZ_RXWO01000154.1	859	1422	-	1
			cas_type_I-F1	Cas7f	WP_034029353.1	type I-F CRISPR-associated protein Csy3 [Pseudomonas]	NZ_RXWO01000154.1	1426	2454	-	2
			cas_type_I-F1	Cas5f	WP_034068991.1	type I-F CRISPR-associated protein Csy2 [Pseudomonas aeruginosa]	NZ_RXWO01000154.1	2465	3448	-	3
			cas_type_I-F1	Cas8f	WP_004343803.1	type I-F CRISPR-associated protein Csy1 [Pseudomonas]	NZ_RXWO01000154.1	3435	4739	-	4
			cas_type_I-F1	Cas23f	WP_004343802.1	type I-F CRISPR-associated helicase Cas3f [Pseudomonas aeruginosa]	NZ_RXWO01000154.1	4797	8027	-	5
			cas_type_I-F1	Cas1f	WP_004343801.1	type I-F CRISPR-associated endonuclease Cas1f [Pseudomonas]	NZ_RXWO01000154.1	8024	8998	-	6
			CRISPR_array	CRISPR_array	CRISPR003	CRISPR003; repeat=GTTCACTGCCGTGTAGGCAGCTAAGAAA; score=6.26	NZ_RXWO01000154.1	9259	10489	-	6.02
		11538	DMS_other	MTase_II	WP_033966841.1	DNA cytosine methyltransferase [Pseudomonas aeruginosa]	NZ_RXWN01000024.1	52885	55008	-	54	14	75.71
			DMS_other	DndC	WP_099256681.1	phosphoadenosine phosphosulfate reductase family protein [Pseudomonas aeruginosa]	NZ_RXWN01000024.1	55022	56452	-	55
			PDC-M30	PDC-M30A	WP_003111048.1	three-Cys-motif partner protein TcmP [Pseudomonas]	NZ_RXWN01000034.1	92035	93351	-	88
			PDC-M30	PDC-M30B	pseudo_subWP_016975890.1	phage Gp37/Gp68 family protein [Pseudomonas aeruginosa]	NZ_RXWN01000034.1	93373	93795	-	89
			thoeris_type_I	ThsB1	WP_024087536.1	hypothetical protein [Proteobacteria]	NZ_RXWN01000034.1	149053	149616	+	147
			thoeris_type_I	ThsA1	WP_033936961.1	DUF6430 domain-containing protein [Proteobacteria]	NZ_RXWN01000034.1	149638	150486	+	148
			PDC-S35	PDC-S35	WP_011002526.1	nucleotide-binding protein [Proteobacteria]	NZ_RXWN01000034.1	150814	151515	-	149
			PDC-S02	PDC-S02	WP_024087545.1	PDDEXK nuclease domain-containing protein [Proteobacteria]	NZ_RXWN01000034.1	159812	160867	-	157
			PD-T4-6	PD-T4-6	WP_003097784.1	serine/threonine protein kinase [Pseudomonas]	NZ_RXWN01000040.1	6329	7318	-	10
			HEC-06	HEC-06	WP_023123159.1	DUF262 domain-containing protein [Pseudomonas aeruginosa]	NZ_RXWN01000041.1	628	2760	-	3
			RM_type_III	REase_III	WP_112207441.1	DEAD/DEAH box helicase family protein [Pseudomonas aeruginosa]	NZ_RXWN01000041.1	2889	5657	-	4
			RM_type_III	MTase_III	WP_024099882.1	site-specific DNA-methyltransferase [Pseudomonas aeruginosa]	NZ_RXWN01000041.1	5710	7428	-	5
			DMS_other	DrmD	WP_079280743.1	DEAD/DEAH box helicase [Pseudomonas aeruginosa]	NZ_RXWN01000041.1	9658	12531	-	8
			gabija	GajA	WP_003109853.1	AAA family ATPase [Pseudomonas]	NZ_RXWN01000050.1	48601	50451	+	61
			gabija	GajB	WP_003117144.1	UvrD-helicase domain-containing protein [Pseudomonas]	NZ_RXWN01000050.1	50448	52160	+	62
			helicase-DUF2290	Helicase	WP_003159898.1	DEAD/DEAH box helicase [Pseudomonas]	NZ_RXWN01000091.1	67918	70053	+	57
			helicase-DUF2290	DUF2290	WP_003112393.1	DUF2290 domain-containing protein [Pseudomonas]	NZ_RXWN01000091.1	70046	70747	+	58
			PDC-S39	PDC-S39	WP_003112392.1	hypothetical protein [Pseudomonas]	NZ_RXWN01000091.1	71250	73079	-	59
			RM_type_I	REase_I	WP_003121823.1	DEAD/DEAH box helicase family protein [Pseudomonas aeruginosa]	NZ_RXWN01000109.1	88057	91239	-	87
			PDC-S14	PDC-S14	WP_003121821.1	GIY-YIG nuclease family protein [Pseudomonas aeruginosa]	NZ_RXWN01000109.1	92974	93915	-	89
			RM_type_I	Specificity_I	WP_003121820.1	restriction endonuclease subunit S [Pseudomonas aeruginosa]	NZ_RXWN01000109.1	93912	95249	-	90
			RM_type_I	MTase_I	WP_003121819.1	type I restriction-modification system subunit M [Pseudomonas aeruginosa]	NZ_RXWN01000109.1	95246	97165	-	91
		11976	PD-T4-6	PD-T4-6	WP_003097784.1	serine/threonine protein kinase [Pseudomonas]	NZ_RXWM01000021.1	127791	128780	+	118	26	61.34
			PDC-S02	PDC-S02	WP_126558566.1	PDDEXK nuclease domain-containing protein [Pseudomonas]	NZ_RXWM01000026.1	38	979	+	1
			RM_type_II	MTase_II	WP_071540816.1	DNA cytosine methyltransferase [Pseudomonas aeruginosa]	NZ_RXWM01000037.1	56747	57973	+	70
			RM_type_II	REase_II	WP_071540815.1	ATP-binding protein [Pseudomonas aeruginosa]	NZ_RXWM01000037.1	57960	60062	-	71
			SoFic	SoFic	WP_015649718.1	Fic family protein [Pseudomonas]	NZ_RXWM01000045.1	115122	116243	-	125
			gabija	GajA	WP_033895410.1	AAA family ATPase [Pseudomonas]	NZ_RXWM01000049.1	25610	27562	+	39
			gabija	GajB	WP_025297468.1	ATP-dependent helicase [Pseudomonas]	NZ_RXWM01000049.1	27559	29226	+	40
			RosmerTA	RmrT	WP_071534660.1	hypothetical protein [Pseudomonas]	NZ_RXWM01000049.1	39830	40498	+	53
			RosmerTA	RmrA	WP_025297456.1	XRE family transcriptional regulator [Pseudomonas]	NZ_RXWM01000049.1	40495	41601	+	54
			DMS_other	WYL	WP_033895413.1	WYL domain-containing protein [Pseudomonas]	NZ_RXWM01000049.1	45548	46423	-	59
			DMS_other	mad1	WP_025297450.1	helix-turn-helix domain-containing protein [Pseudomonas]	NZ_RXWM01000049.1	49978	50181	+	63
			brex_type_I	BrxA	WP_025297449.1	DUF1819 family protein [Pseudomonas]	NZ_RXWM01000049.1	50174	50785	+	64
			brex_type_I	BrxB	WP_196692495.1	DUF1788 domain-containing protein [Pseudomonas]	NZ_RXWM01000049.1	50809	51438	+	65
			brex_type_I	BrxC	WP_025297447.1	BREX system P-loop protein BrxC [Pseudomonas]	NZ_RXWM01000049.1	51450	55004	+	66
			brex_type_I	PglX	WP_041127207.1	BREX-1 system adenine-specific DNA-methyltransferase PglX [Pseudomonas aeruginosa]	NZ_RXWM01000049.1	55084	56904	+	67
			HEC-02	HEC-02A	WP_025297774.1	ATP-binding protein [Pseudomonas]	NZ_RXWM01000049.1	56901	58040	+	68
			HEC-02	HEC-02B	WP_025297775.1	hypothetical protein [Pseudomonas]	NZ_RXWM01000049.1	58040	58597	+	69
			DRT_class_III	RT_UG5-nitrilase	WP_079379923.1	Reverse transcriptase [Pseudomonas]	NZ_RXWM01000049.1	59116	61614	+	70
			brex_type_I	PglX	WP_197270530.1	BREX-1 system adenine-specific DNA-methyltransferase PglX [Pseudomonas]	NZ_RXWM01000049.1	61641	63392	+	71
			HEC-05	HEC-05	WP_025298036.1	DUF262 domain-containing protein [Pseudomonas]	NZ_RXWM01000049.1	63396	65267	+	72
			brex_type_I	PglZ	WP_025298035.1	BREX-1 system phosphatase PglZ type A [Pseudomonas]	NZ_RXWM01000049.1	65264	67771	+	73
			brex_type_I	BrxL	WP_033895418.1	BREX system Lon protease-like protein BrxL [Pseudomonas]	NZ_RXWM01000049.1	67784	69880	+	74
			DMS_other	MTase_I	WP_015649025.1	type I restriction-modification system subunit M [Pseudomonas]	NZ_RXWM01000049.1	72267	74192	+	76
			DMS_other	Specificity_I	WP_015649024.1	restriction endonuclease subunit S [Pseudomonas]	NZ_RXWM01000049.1	74182	75549	+	77
			zorya_type_I	ZorA1	WP_025297974.1	anti-phage defense ZorAB system protein ZorA [Pseudomonas]	NZ_RXWM01000049.1	75700	77895	+	78
			zorya_type_I	ZorB1	WP_015649022.1	OmpA family protein [Pseudomonas]	NZ_RXWM01000049.1	77909	78646	+	79
			zorya_type_I	ZorC1	WP_015649021.1	hypothetical protein [Pseudomonas]	NZ_RXWM01000049.1	78647	80290	+	80
			zorya_type_I	ZorD1	WP_015649020.1	DEAD/DEAH box helicase [Pseudomonas]	NZ_RXWM01000049.1	80290	83541	+	81
			DMS_other	REase_I	WP_025297899.1	type I restriction endonuclease subunit R [Pseudomonas]	NZ_RXWM01000049.1	87790	90891	+	84
			Pycsar_effector	PycTIR	WP_010562503.1	nucleotide-binding protein [Pseudomonas]	NZ_RXWM01000101.1	1707	2633	+	3
			Pycsar_effector	PycC	WP_003127475.1	transcriptional regulator [Pseudomonas]	NZ_RXWM01000101.1	2714	4258	+	4
			AbiE	AbiEi	WP_003149145.1	hypothetical protein [Pseudomonas aeruginosa]	NZ_RXWM01000106.1	94603	95133	+	102
			AbiE	AbiEii	WP_003149146.1	nucleotidyl transferase AbiEii/AbiGii toxin family protein [Pseudomonas aeruginosa]	NZ_RXWM01000106.1	95166	96086	+	103
			DMS_other	mad8	pseudo_subNP_251305.1	DNA translocase FtsK [Pseudomonas aeruginosa PAO1]	NZ_RXWM01000106.1	116703	116900	-	136
			DMS_other	DndC	WP_052155109.1	phosphoadenosine phosphosulfate reductase family protein [Pseudomonas aeruginosa]	NZ_RXWM01000106.1	118841	120580	-	139
			DMS_other	DrmD	WP_042861660.1	DEAD/DEAH box helicase [Pseudomonas aeruginosa]	NZ_RXWM01000106.1	121012	122976	+	141
			AbiE	AbiEi	WP_023121122.1	type IV toxin-antitoxin system AbiEi family antitoxin domain-containing protein [Proteobacteria]	NZ_RXWM01000113.1	19875	20633	+	21
			AbiE	AbiEii	WP_016851972.1	nucleotidyl transferase AbiEii/AbiGii toxin family protein [Proteobacteria]	NZ_RXWM01000113.1	20626	21546	+	22
			wadjet_type_I	JetA1	WP_071534647.1	DUF3375 domain-containing protein [Pseudomonas]	NZ_RXWM01000113.1	131078	132577	+	128
			wadjet_type_I	JetB1	WP_015647862.1	DUF4194 domain-containing protein [Pseudomonas]	NZ_RXWM01000113.1	132580	133329	+	129
			wadjet_type_I	JetC1	WP_015647863.1	hypothetical protein [Pseudomonas]	NZ_RXWM01000113.1	133326	136631	+	130
			wadjet_type_I	JetD1	WP_010792099.1	DUF2220 family protein [Pseudomonas]	NZ_RXWM01000113.1	136615	137796	+	131
			argonaute_type_III	PprPIWI	WP_057384207.1	RNaseH domain-containing protein [Pseudomonas]	NZ_RXWM01000113.1	138036	140387	-	132
			argonaute_type_III	PprDinG	WP_025297994.1	hypothetical protein [Pseudomonas]	NZ_RXWM01000113.1	140384	143458	-	133
			argonaute_type_III	PprRE	WP_024928871.1	hypothetical protein [Pseudomonas]	NZ_RXWM01000113.1	143442	144482	-	134
			PDC-M30	PDC-M30B	WP_003111049.1	phage Gp37/Gp68 family protein [Pseudomonas]	NZ_RXWM01000119.1	14672	15415	+	17
			PDC-M30	PDC-M30A	WP_003111048.1	three-Cys-motif partner protein TcmP [Pseudomonas]	NZ_RXWM01000119.1	15437	16753	+	18
			cbass_type_III	Effector	WP_003050273.1	cbass effector endonuclease NucC [Proteobacteria]	NZ_RXWM01000137.1	13236	13961	-	15
			cbass_type_III	Cyclase	WP_003090158.1	nucleotidyltransferase domain-containing protein [Proteobacteria]	NZ_RXWM01000137.1	14000	14902	-	16
			cbass_type_III	HORMA	WP_003090159.1	hypothetical protein [Proteobacteria]	NZ_RXWM01000137.1	14902	15402	-	17
			cbass_type_III	HORMA	WP_003090160.1	hypothetical protein [Proteobacteria]	NZ_RXWM01000137.1	15399	15869	-	18
			cbass_type_III	TRIP13	WP_016852809.1	AAA family ATPase [Proteobacteria]	NZ_RXWM01000137.1	15866	16780	-	19
			PDC-M06	PDC-M06A	WP_023087033.1	hypothetical protein [Pseudomonas]	NZ_RXWM01000140.1	40007	40282	+	39
			PDC-M06	PDC-M06B	WP_023087034.1	hypothetical protein [Pseudomonas]	NZ_RXWM01000140.1	40287	40811	+	40
			PDC-S65	PDC-S65	WP_025297987.1	SIR2 family protein [Pseudomonas]	NZ_RXWM01000140.1	63031	64812	-	59
			RM_type_I	MTase_I	WP_025297869.1	type I restriction-modification system subunit M [Pseudomonas]	NZ_RXWM01000148.1	28109	30499	+	28
			RM_type_I	Specificity_I	WP_033895201.1	restriction endonuclease subunit S [Pseudomonas]	NZ_RXWM01000148.1	30504	31811	+	29
			RM_type_I	REase_I	WP_025297872.1	DEAD/DEAH box helicase family protein [Pseudomonas]	NZ_RXWM01000148.1	33603	36620	+	31
			RM_type_III	MTase_III	WP_031654446.1	site-specific DNA-methyltransferase [Proteobacteria]	NZ_RXWM01000158.1	1924	3657	+	2
			RM_type_III	REase_III	WP_023121140.1	DEAD/DEAH box helicase family protein [Proteobacteria]	NZ_RXWM01000158.1	3657	6395	+	3
			cbass_type_II	JAB	WP_071557665.1	Mov34/MPN/PAD-1 family protein [Proteobacteria]	NZ_RXWM01000158.1	9941	10417	-	7
			cbass_type_II	E1-E2	WP_023121144.1	ThiF family adenylyltransferase [Proteobacteria]	NZ_RXWM01000158.1	10405	12036	-	8
			cbass_type_II	Cyclase	WP_023121145.1	hypothetical protein [Proteobacteria]	NZ_RXWM01000158.1	12033	13175	-	9
			cbass_type_II	Effector	WP_023121146.1	patatin-like phospholipase family protein [Proteobacteria]	NZ_RXWM01000158.1	13169	14170	-	10
			PDC-S16	PDC-S16	WP_023093135.1	DUF2188 domain-containing protein [Proteobacteria]	NZ_RXWM01000158.1	14177	14401	-	11
			cbass_type_II	capH	WP_031654450.1	helix-turn-helix domain-containing protein [Proteobacteria]	NZ_RXWM01000158.1	14689	15081	+	12
			cbass_type_II	capP	WP_023121147.1	ImmA/IrrE family metallo-endopeptidase [Proteobacteria]	NZ_RXWM01000158.1	15084	15953	+	13
		12282	PDC-M30	PDC-M30B	WP_015060166.1	phage Gp37/Gp68 family protein [Pseudomonas]	NZ_RXWL01000030.1	11911	12693	+	15	19	30
			PDC-M30	PDC-M30A	WP_004352835.1	three-Cys-motif partner protein TcmP [Pseudomonas]	NZ_RXWL01000030.1	12726	13979	+	16
			PD-T4-6	PD-T4-6	WP_003097784.1	serine/threonine protein kinase [Pseudomonas]	NZ_RXWL01000038.1	20393	21382	+	17
			SoFic	SoFic	WP_003118891.1	Fic family protein [Pseudomonas aeruginosa]	NZ_RXWL01000042.1	91663	92784	+	95
			hachiman_type_I	HamA1	WP_010791936.1	SAVED domain-containing protein [Pseudomonas]	NZ_RXWL01000063.1	1049	1843	+	2
			hachiman_type_I	HamB1	WP_003119220.1	DEAD/DEAH box helicase family protein [Pseudomonas aeruginosa]	NZ_RXWL01000063.1	1844	4324	+	3
			wadjet_type_I	JetA1	WP_071536090.1	DUF3375 domain-containing protein [Pseudomonas aeruginosa]	NZ_RXWL01000067.1	4003	5502	+	6
			wadjet_type_I	JetB1	WP_003119440.1	DUF4194 domain-containing protein [Pseudomonas aeruginosa]	NZ_RXWL01000067.1	5505	6254	+	7
			wadjet_type_I	JetC1	WP_003159609.1	ATP synthase [Pseudomonas aeruginosa]	NZ_RXWL01000067.1	6251	9556	+	8
			wadjet_type_I	JetD1	WP_010792099.1	DUF2220 family protein [Pseudomonas]	NZ_RXWL01000067.1	9540	10721	+	9
			argonaute_type_III	PprPIWI	WP_003124229.1	RNaseH domain-containing protein [Pseudomonas aeruginosa]	NZ_RXWL01000067.1	10962	13313	-	10
			argonaute_type_III	PprDinG	WP_010792098.1	hypothetical protein [Pseudomonas aeruginosa]	NZ_RXWL01000067.1	13310	16384	-	11
			argonaute_type_III	PprRE	WP_010792097.1	hypothetical protein [Pseudomonas aeruginosa]	NZ_RXWL01000067.1	16368	17408	-	12
			PDC-S02	PDC-S02	WP_126558566.1	PDDEXK nuclease domain-containing protein [Pseudomonas]	NZ_RXWL01000076.1	48	989	+	1
			shedu	SduA	WP_010791718.1	DUF4263 domain-containing protein [Pseudomonas aeruginosa]	NZ_RXWL01000108.1	2468	3898	+	3
			RM_type_I	REase_I	WP_010791769.1	DEAD/DEAH box helicase family protein [Pseudomonas]	NZ_RXWL01000114.1	25188	27623	+	39
			RM_type_I	MTase_I	WP_003124483.1	type I restriction-modification system subunit M [Pseudomonas]	NZ_RXWL01000114.1	27659	29437	+	40
			RM_type_I	Specificity_I	WP_003120661.1	restriction endonuclease subunit S [Pseudomonas]	NZ_RXWL01000114.1	29437	31413	+	41
			DMS_other	mad3	WP_003120662.1	AAA family ATPase [Pseudomonas]	NZ_RXWL01000114.1	31415	33166	+	42
			septu_type_I	PtuA1	WP_003120662.1	AAA family ATPase [Pseudomonas]	NZ_RXWL01000114.1	31415	33166	+	42
			septu_type_I	PtuB1	WP_010791768.1	hypothetical protein [Pseudomonas]	NZ_RXWL01000114.1	33163	34041	+	43
			PDC-S02	PDC-S02	WP_010791767.1	restriction endonuclease [Pseudomonas]	NZ_RXWL01000114.1	34104	35096	+	44
			RM_type_I	Specificity_I	WP_003160958.1	restriction endonuclease subunit S [Pseudomonas]	NZ_RXWL01000119.1	41152	42261	-	36
			RM_type_I	MTase_I	WP_003160959.1	type I restriction-modification system subunit M [Pseudomonas]	NZ_RXWL01000119.1	42258	43841	-	37
			RM_type_I	REase_I	WP_031654465.1	DEAD/DEAH box helicase family protein [Pseudomonas]	NZ_RXWL01000119.1	43874	47257	-	38
			druantia_type_III	DruH3	WP_206425296.1	STY4851/ECs_5259 family protein [Pseudomonas]	NZ_RXWL01000119.1	60079	63408	+	51
			druantia_type_III	DruE3	WP_003160970.1	DEAD/DEAH box helicase [Pseudomonas]	NZ_RXWL01000119.1	63414	69629	+	52
			PDC-S06	PDC-S06	WP_003160977.1	AAA family ATPase [Pseudomonas]	NZ_RXWL01000119.1	78856	81135	-	59
			CRISPR_array	CRISPR_array	CRISPR001	CRISPR001; repeat=GTTCACTGCCGTACAGGCAGCTAAGAAA; score=6.19	NZ_RXWL01000124.1	7000	7748	-	8.01
			cbass_type_III	Effector	WP_003120003.1	cbass effector endonuclease NucC [Proteobacteria]	NZ_RXWL01000152.1	13230	13955	-	15
			cbass_type_III	Cyclase	WP_003105624.1	nucleotidyltransferase domain-containing protein [Proteobacteria]	NZ_RXWL01000152.1	13994	14896	-	16
			cbass_type_III	HORMA	WP_003090159.1	hypothetical protein [Proteobacteria]	NZ_RXWL01000152.1	14896	15396	-	17
			cbass_type_III	HORMA	WP_003105626.1	hypothetical protein [Proteobacteria]	NZ_RXWL01000152.1	15393	15863	-	18
			cbass_type_III	TRIP13	WP_003120002.1	AAA family ATPase [Proteobacteria]	NZ_RXWL01000152.1	15860	16774	-	19
			Ppl	Ppl	WP_031774381.1	chromosome segregation protein SMC [Pseudomonas aeruginosa]	NZ_RXWL01000154.1	7459	10305	-	9
			PDC-M30	PDC-M30A	WP_003117068.1	three-Cys-motif partner protein TcmP [Pseudomonas aeruginosa]	NZ_RXWL01000156.1	1992	3182	+	3
			PDC-M30	PDC-M30B	WP_003117069.1	phage Gp37/Gp68 family protein [Pseudomonas]	NZ_RXWL01000156.1	3415	4158	+	4
			PDC-M30	PDC-M30A	WP_003117070.1	three-Cys-motif partner protein TcmP [Pseudomonas]	NZ_RXWL01000156.1	4176	5510	+	5
			Mokosh_TypeI	MkoB	WP_009681706.1	hypothetical protein [Pseudomonas]	NZ_RXWL01000166.1	5830	7386	-	5
			Mokosh_TypeI	MkoA	WP_009681705.1	NERD domain-containing protein [Pseudomonas]	NZ_RXWL01000166.1	7379	12337	-	6
		12283	cbass_type_II	Cyclase	WP_033994117.1	nucleotidyltransferase [Pseudomonas aeruginosa]	NZ_RXWK01000004.1	262862	264064	+	219	9	67.14
			cbass_type_II	E1-E2	WP_033994116.1	ThiF family adenylyltransferase [Pseudomonas aeruginosa]	NZ_RXWK01000004.1	264061	265779	+	220
			cbass_type_II	JAB	WP_033994115.1	Mov34/MPN/PAD-1 family protein [Pseudomonas aeruginosa]	NZ_RXWK01000004.1	265769	266236	+	221
			cbass_type_II	Effector	WP_033994111.1	SAVED domain-containing protein [Pseudomonas aeruginosa]	NZ_RXWK01000004.1	266230	267300	+	222
			PDC-S06	PDC-S06	WP_201020907.1	AAA family ATPase [Pseudomonas aeruginosa]	NZ_RXWK01000006.1	162141	164135	-	149
			PDC-S39	PDC-S39	WP_003112392.1	hypothetical protein [Pseudomonas]	NZ_RXWK01000009.1	191290	193119	+	182
			helicase-DUF2290	DUF2290	WP_003112393.1	DUF2290 domain-containing protein [Pseudomonas]	NZ_RXWK01000009.1	193622	194323	-	183
			helicase-DUF2290	Helicase	WP_003159898.1	DEAD/DEAH box helicase [Pseudomonas]	NZ_RXWK01000009.1	194316	196451	-	184
			cbass_type_I	Effector	WP_158701871.1	hypothetical protein [Pseudomonas aeruginosa]	NZ_RXWK01000010.1	232599	233531	-	216
			cbass_type_I	Cyclase	WP_052156442.1	hypothetical protein [Pseudomonas aeruginosa]	NZ_RXWK01000010.1	233536	234534	-	217
			cbass_type_I	Effector	WP_070654240.1	hypothetical protein [Pseudomonas aeruginosa]	NZ_RXWK01000010.1	234750	235340	-	218
			PifA	PifA	WP_126633247.1	AAA family ATPase [Pseudomonas aeruginosa]	NZ_RXWK01000011.1	66699	68963	-	56
			CRISPR_array	CRISPR_array	CRISPR001	CRISPR001; repeat=GTTCACTGCCGTGTAGGCAGCTAAGAAA; score=6.26	NZ_RXWK01000015.1	182166	183214	+	132.01
			cas_type_I-F1	Cas1f	WP_033993606.1	type I-F CRISPR-associated endonuclease Cas1f [Pseudomonas aeruginosa]	NZ_RXWK01000015.1	183479	184453	+	133
			cas_type_I-F1	Cas23f	WP_033993609.1	type I-F CRISPR-associated helicase Cas3f [Pseudomonas aeruginosa]	NZ_RXWK01000015.1	184450	187680	+	134
			cas_type_I-F1	Cas8f	WP_033993612.1	type I-F CRISPR-associated protein Csy1 [Pseudomonas aeruginosa]	NZ_RXWK01000015.1	187738	189042	+	135
			cas_type_I-F1	Cas5f	WP_009876498.1	type I-F CRISPR-associated protein Csy2 [Pseudomonas aeruginosa]	NZ_RXWK01000015.1	189029	190012	+	136
			cas_type_I-F1	Cas7f	WP_003143949.1	type I-F CRISPR-associated protein Csy3 [Pseudomonas]	NZ_RXWK01000015.1	190023	191051	+	137
			cas_type_I-F1	Cas6f	WP_023087476.1	type I-F CRISPR-associated endoribonuclease Cas6/Csy4 [Pseudomonas]	NZ_RXWK01000015.1	191055	191618	+	138
			CRISPR_array	CRISPR_array	CRISPR002	CRISPR002; repeat=GTTCACTGCCGTATAGGCAGCTAAGAAA; score=6.15	NZ_RXWK01000015.1	191743	192548	-	138.02
[truncated: 1,183 more rows]
