# Supplementary material for: Correlation of Pseudomonas aeruginosa Phage Resistance with the Numbers and Types of Antiphage Systems
Source: Int J Mol Sci. 2024 Jan 24;25(3):1424. doi: 10.3390/ijms25031424 (PMC10855318; doi:10.3390/ijms25031424)
Supplement: Supplementary file 1 [file ijms-25-01424-s001.zip › Supplementary Table S7 - Phage Host Ranges.xlsx]

## Sheet: Sup Tab S7 - Phage-Host
Table S7. Host ranges of 70 phages against 100 diverse strains of P. aeruginosa.
Number	P.a strains	AFR40	AFR41	AFR43	KEN3	KEN5	KEN6	KEN9	KEN10	AFR19	AFR20	AFR21	AFR26	AFR28	AFR33	KEN7	KEN19	KEN30	KEN49	KEN50	KEN51	EPa15	EPa22	EPa16	EPa17	EPa18	EPa11	EPa39	EPa4	EPa82	EPa83	EPa87	EPa95	EPa99	EPa100	EPa104	EPa112	EPa113	EPa114	EPa115	EPa116	EPa118	EPa125	EPp1	EPa3	EPa5	EPa6	EPa7	EPa8
1	315	20000000000	200000000	1000000000000	15000000000	5000000000	20000000	10000000000	150000000000	200000000000	300000000000	50000000000	200000000000	25000000	0	1000000000	0	200000000000	0	40000000000	LFW -3	50000000000	250000000	0	350000	200000	5000000000	50000000000	LFW-3	LFW-2	LFW-3	LFW-1	0	2000000000	5000000000	30000000	0	LFW -2	LFW -3	LFW -4	0	LFW -1	40000000000	0	20000000000	5000000000	LFW -1	20000000000	500000000000
2	317	0	0	0	LFW -1	0	0	0	0	0	0	0	0	0	0	0	0	0	0	LFW -2	0	50000000000	0	50000000	0	0	LFW -4	25000000000	LFW-3	LFW-2	LFW-2	LFW-1	0	LFW -1	LFW -2	0	0	LFW -1	LFW -1	LFW -1	0	0	0	0	30000000000	LFW -3	LFW -3	LFW -4	LFW -3
3	321	50000000000	300000000000	1000000000000	8000000000	50000000000	1500000000	40000000000	50000000000	50000000000	150000000000	150000000000	30000000000	150000000000	0	35000000000	50000000000	50000000000	3000000000	35000000000	50000000000	2500000000000	650000000000	0	2000000	100000000	2500000000000	500000000000	LFW-3	LFW-1	LFW-1	0	1000000	15000000000	25000000000	300000000	0	3000000000	10000000000	20000000000	5000000	10000000000	30000000000	0	150000000000	150000000000	10000000000	150000000000	1000000000000
4	552	0	0	0	LFW -3	10000000000	200000000	25000000000	0	0	0	0	0	LFW -3	0	0	30000000000	0	3000000000	150000000	25000000000	5000000000000	500000000	250000000	0	0	1000000000000	500000000000	LFW-1	LFW-1	LFW-1	0	0	LFW -4	40000000000	30000000	LFW -2	LFW -1	LFW -3	LFW -4	0	LFW -2	0	0	250000000000	200000000000	LFW -3	100000000000	1000000000000
5	994	5000000000	10000000	40000000000	40000000	25000000	5000000	LFW -1	3000000000	20000000000	50000000000	20000000000	10000000000	5000000	0	150000000000	150000000000	1000000000	LFW -3	50000000	40000000000	50000000	LFW -1	0	0	0	LFW -4	LFW -2	LFW-2	LFW-1	LFW-3	0	0	0	0	0	0	0	0	0	0	0	0	0	LFW -5	LFW -5	LFW -3	LFW -3	LFW -3
6	1344	50000	100000	1100000000000	150000000000	5000000000	250000000	LFW -2	250000000000	400000000000	600000000000	250000000000	50000000000	20000000000	0	50000000000	50000000000	50000	2000000000	20000000	5000000000	1250000000000	LWF -2	0	0	3000000	2500000000000	550000000000	25000000000	5000000000	5000000000	50000000	5000000000	LFW -1	5000000000	4000000	2000000000	LFW -2	LFW -2	LFW -3	0	LFW -3	20000000000	0	50000000000	500000000000	5000000000	15000000	100000000000
7	1356	LFW -2	0	200000000000	2500000000	200000000	LFW -1	0	6000000000	3000000000	200000000000	50000000000	25000000000	5000000	0	0	0	20000000000	0	0	0	0	35000000000	0	0	0	500000000000	0	LFW-3	LFW-1	LFW-1	0	40000	2000000000	0	35000000	200000	1500000000	4000000000	5000000000	500000	1500000000	0	0	LFW -4	LFW -4	LFW -3	LFW -3	0
8	1380	0	0	LFW -1	150000000	15000	0	0	0	0	0	0	0	0	150000	0	0	0	0	0	0	0	0	0	0	0	0	0	500000000	10000000	2500000000	10000000	0	0	0	0	0	0	0	0	0	0	0	3000000000	50000000	LFW -6	LFW -6	LFW -6	0
9	1388	0	0	0	300000000	200000000	0	0	3500000000	0	0	0	0	0	0	0	0	0	0	0	0	LFW -3	0	0	0	0	LFW -2	LFW -2	0	0	0	0	0	1000000000	0	10000000	0	500000000	1500000000	2000000000	500000	500000000	0	0	LFW -1	LFW -2	0	LFW -2	LFW -4
10	1583	LFW -1	LFW -1	200000000000	LFW -3	55000000000	300000000	2000000000	150000000000	0	0	0	1000000	300000000000	0	0	0	0	0	20000000000	0	250000000	25000000	200000000	1000000	150000000	100000000000	750000000000	0	0	0	0	300000	215000000000	1000000000	600000000	0	LFW -1	LFW -2	LFW -2	0	LFW -2	0	0	250000000000	300000000000	LFW -3	200000000000	LFW -6
11	1601	10000000000	400000000000	1000000000000	10000000000	2500000000	250000000	0	200000000000	0	50000000000	400000000000	150000000000	40000000	0	3000000000	200000000000	10000000000	20000000000	30000000000	30000000000	LFW -5	350000000000	0	0	0	2500000000000	LFW -7	1000000	LFW-1	LFW-1	0	500000	25000000000	30000000000	1000000000	0	15000000000	20000000000	5000000000	5000000	20000000000	50000000000	0	LFW -7	LFW -6	LFW -4	LFW -6	LFW -7
12	1612	25000000000	200000000000	200000000000	15000000000	40000000000	150000000	4000000000	600000000000	100000000000	400000000000	250000000000	150000000000	50000000	0	50000000000	45000000000	250000000000	4000000000	1500000000	40000000000	75000000000	1000000000	0	0	0	1000000000	LFW -3	LFW -3	LFW -2	LFW -3	0	1500000	5000000000	25000000000	100000000	0	0	10000000000	LFW -2	1500000	LFW -1	5000000000	0	LFW -4	LFW -7	LFW -6	LFW -7	25000000000
13	1613	50000000000	600000000000	600000000000	50000000000	150000000000	2000000000	50000000000	150000000000	200000000000	500000000000	200000000000	50000000000	300000000000	0	250000000000	60000000000	300000000000	5000000000	150000000000	30000000000	2500000000000	100000000000	0	0	0	500000000000	500000000000	100000	LFW-1	LFW-1	0	LFW -4	5000000000	20000000000	50000000	0	0	10000000000	LFW -2	500000	0	30000000000	0	150000000000	150000000000	LFW -4	100000000000	1000000000000
14	1617	20000000000	4000000000	25000000	35000000000	3000000000	500000000	50000000	150000000000	150000000000	400000000000	200000000000	200000000000	50000000000	0	150000000000	20000000000	300000000000	LFW -3	2500000000	30000000000	50000000000	65000000000	0	0	0	10000000000	LFW -3	0	0	0	0	2000000000	700000000	500000000	25000000	0	0	LFW -3	1000000000	2000000000	1000000	300000000	0	LFW -4	LFW -4	LFW -4	LFW -4	LFW -7
15	1688	50000000000	500000000	1000000000000	20000000000	10000000000	150000000	0	250000000000	500000000000	700000000000	500000000000	100000000000	50000000	0	100000000000	60000000000	100000000000	3000000000	150000000	20000000000	500000000	LFW -2	0	0	0	100000000000	50000000000	LFW-5	LFW-4	LFW-4	LFW -1	0	0	LFW -1	0	0	0	LFW -1	LFW -2	0	0	40000000000	0	LFW -4	LFW -4	LFW -5	LFW -4	LFW -4
16	1739	20000000000	100000000	200000000000	3000000000	2500000000	300000000	LFW -1	50000000000	100000000000	250000000000	50000000000	20000000000	15000000	0	3000000000	LFW -1	50000000000	0	50000000	LFW -1	0	0	0	0	40000000	1000000000000	750000000000	LFW-1	0	0	0	2000000000	0	0	0	20000000000	0	0	0	0	0	5000000000	0	0	0	0	LFW -3	0
17	1899	50000000000	350000000000	250000000000	40000000000	15000000000	150000000	500000000	250000000000	150000000000	250000000000	250000000000	150000000000	25000000	0	300000000000	10000000000	250000000000	1500000000	100000000	10000000000	900000000	15000000	150000000	100000	100000000	LFW -4	LFW -2	LFW-5	LFW-4	LFW-4	LFW -1	0	30000000	LFW -2	2000000	0	LFW -1	LFW -2	LFW -1	LFW -1	LFW -1	25000000000	0	4500000000	15000000000	5000000000	35000000000	400000000000
18	1902	20000000	LFW -1	LFW -4	25000000000	3000000	0	0	LFW -1	5000000000	25000000000	LFW -3	LFW -2	0	0	0	40000000000	LFW -1	400000000	1500000	LFW -1	LFW -3	LFW -4	0	0	0	0	0	LFW-1	0	0	0	LFW -3	LFW -1	LFW -2	0	1000000	LFW -1	LFW -1	LFW -1	0	LFW -1	0	0	25000000000	50000000000	150000000000	5000000000	1000000000
19	1906	200000	LFW -2	LFW -2	30000000000	3000000	0	0	LFW -2	LFW -1	LFW -2	LFW -1	0	0	0	LFW -1	0	10000000	2500000000	3000000	4000000000	0	LFW -3	0	0	0	1000000000000	LFW -4	10000000000	500000000	500000000	50000	700000000	0	0	0	0	0	0	0	0	0	0	0	LFW -2	LFW -2	LFW -3	LFW -3	0
20	1925	0	LFW -2	LFW -1	25000000000	2000000	0	1000000	LFW -1	0	0	0	0	0	0	LFW -1	0	LFW -1	0	1500000000	0	LFW -2	500000000000	0	0	0	LFW -4	LFW -4	35000000000	LFW-3	LFW-3	0	0	150000000	LFW -1	150000000	0	LFW -3	500000000	1500000000	1500000	100000000	0	0	50000000	100000000	500000	15000000000	450000000000
21	1938	50000000000	250000000	2500000000	25000000000	5000000000	50000000	300000	500000000000	400000000000	500000000000	200000000000	150000000000	35000000	0	30000000000	LFW -3	250000000000	0	LFW -2	0	0	300000000	0	0	0	LFW -3	0	LFW-2	LFW-2	LFW-2	0	2500000000	LFW -1	0	0	1000000	LFW -1	LFW -1	LFW -1	0	0	30000000000	0	LFW -5	LFW -5	LFW -5	LFW -4	LFW -2
22	1948	200000000	200000000000	250000000	0	20000000000	1500000000	40000000000	LFW -1	5000000000	150000000000	5000000000	1500000000	200000000000	0	0	LFW -4	100000	LFW -3	2500000000	3000000000	3500000000	25000000000	0	0	40000000	15000000	LFW -5	5000000000	5000000	150000000	0	LFW -1	300000000	20000000000	20000000	0	0	LFW -4	0	0	0	2000000000	0	LFW -3	LFW -2	LFW -3	100000000000	50000000000
23	3587	5000000000	1000000000	6000000000	20000000000	30000000000	300000000	40000000000	100000000000	200000000000	200000000000	250000000000	200000000000	50000000000	0	250000000000	40000000000	100000000000	5000000000	20000000000	10000000000	LFW -4	250000000	100000000	50000	LFW -1	LFW -5	LFW -2	LFW-3	LFW-2	LFW-2	0	15000000000	10000000000	35000000000	100000000	0	10000000000	5000000000	100000000000	2500000	15000000000	100000000000	0
24	2101	10000000000	200000000	15000000000	25000000000	2500000000	50000000	0	600000000000	300000000000	700000000000	500000000000	100000000000	40000000	0	300000000000	100000000	300000000000	LFW -2	100000000000	LFW -3	1000000000000	450000000000	0	0	0	10000000000	100000000	500000	LFW -1	LFW -1	0	10000000000	10000000000	10000000000	1500000000	0	150000000	1000000000	2000000000	3000000	150000000	20000000000	0	LFW -4	100000000000	LFW -6	1000000000	2000000000000
25	2108	500000	LFW -3	0	LFW -2	LFW -3	0	LFW -2	0	0	0	0	0	1000000	0	0	20000000000	0	1000000000	1500000	3000000000	500000000000	300000000000	200000000	400000	10000000	LFW -4	LFW -4	LFW-5	LFW-3	LFW-4	0	3000000000	20000000000	10000000000	500000000	10000000	3000000000	10000000000	30000000000	4000000	10000000000	0	0	40000000000	15000000000	5000000000	50000000000	1500000000000
26	2144	2500000000	400000	LFW -1	LFW -2	LFW -1	0	0	LFW -2	LFW -1	LFW -1	LFW -1	LFW -1	0	0	1500000000	LFW -1	LFW -1	0	100000000	0	LFW -1	250000000000	0	0	0	100000000000	1000000000	5000000	LFW-2	LFW-2	0	0	0	0	0	0	0	LFW -2	LFW -2	1000000	0	10000000	0	10000000000	10000000000	1000000000	15000000000	1500000000000
27	2444	LFW -2	0	5000000000	LFW -3	250000000	0	LFW -1	LFW -4	250000000000	250000000000	400000000000	300000	LFW -1	0	LFW -1	0	LFW -2	0	0	0	LFW -2	LFW -1	0	0	0	15000000000	200000000000	100000000	0	0	0	0	LFW -1	LFW -1	0	0	0	0	0	0	0	LFW -3	0	50000000000	500000000000	500000000	0	LFW -5
28	3705	20000000000	500000000	5000000000	20000000000	40000000000	250000000	10000000000	500000000000	200000000000	300000000000	250000000000	100000000000	30000000	0	350000000000	1000000000	50000000000	LFW -1	10000000	2000000000	0	20000000000	0	0	0	5000000000	5000000000	1000000000	1000000000	1000000000	15000000	LFW -1	0	0	0	0	0	500000000	1500000000	0	0	50000000000	0	500000000	3000000000	LFW -2	LFW -2	0
29	4841	50000000000	100000000	10000000000	400000000000	2500000000	200000000	15000000000	300000000000	250000000000	500000000000	350000000000	100000000000	100000000000	0	300000000000	0	50000000000	0	0	LFW -1	300000000	50000000000	0	0	15000000	LFW -2	LFW -3	LFW-2	LFW -1	LFW -1	LFW -1	0	0	15000000	0	1000000000	0	LFW -2	LFW -2	500000	0	15000000000	0	LFW -3	LFW -3	LFW -3	1000000000	1000000000000
30	5498	30000000000	100000000	3000000000	15000000000	2500000000	50000000	0	500000000000	400000000000	700000000000	150000000000	80000000000	10000000	0	150000000000	0	100000000000	0	10000000	0	LFW -1	LFW -3	0	0	0	0	0	0	0	0	0	LFW -2	LFW -1	0	0	0	0	LFW -2	LFW -2	0	0	30000000000	0	0	0	LFW -4	0	LFW -2
31	5508	0	750000000000	0	10000000000	1500000	0	0	0	0	0	0	2500000	0	0	0	0	0	0	LFW -2	0	0	45000000000	0	0	0	10000000000	2000000000	LFW -2	0	0	0	1000000	35000000000	0	1000000000	0	3000000000	15000000000	100000000000	1000000	7000000000	0	0	LFW -3	LFW -3	0	0	0
32	5519	0	0	0	LFW -2	LFW -2	0	LFW -2	0	0	0	0	0	LFW -2	0	0	LFW -4	0	0	LFW -1	LFW -3	500000000	100000000	0	0	0	10000000000	0	LFW -2	0	0	0	0	0	LFW -2	0	700000000	0	LFW -1	LFW -2	0	LFW -1	0	0	LFW -3	LFW -3	LFW -3	5000000000	1000000000000
33	5524	0	0	0	0	0	0	0	0	0	0	0	0	0	0	0	0	0	0	0	0	LFW -1	0	0	0	0	5000000000000	0	250000000	25000000	25000000	0	0	0	0	0	0	0	0	0	0	0	0	0	0	0	0	0	LFW -3
34	5539	0	0	0	0	0	0	0	0	0	0	0	0	LFW -2	0	0	LFW -2	0	LFW -2	0	0	2500000000	25000000	0	0	0	500000000	5000000000	LFW -2	LFW -1	LFW -1	LFW -1	0	0	LFW -3	0	1500000000	0	0	0	0	0	0	0	LFW -2	LFW -2	LFW -3	10000000000	500000000000
35	6220	0	0	0	0	0	0	0	0	0	0	0	0	0	0	0	0	0	0	150000000	0	0	0	0	0	0	0	LFW -2	0	0	0	0	0	0	0	0	0	0	0	0	0	0	0	0	0	0	0	0	0
36	6241	0	0	0	0	0	0	0	0	0	0	0	0	0	0	0	0	0	0	0	0	0	0	0	0	0	LFW -4	1000000000	LFW -2	LFW -2	LFW -2	LFW -2	0	0	0	0	0	0	0	0	0	0	0	0	0	0	LFW -2	0	0
37	6678	0	0	0	0	0	0	0	0	0	0	0	0	0	0	0	0	0	0	0	0	0	0	0	0	0	0	0	0	0	0	0	0	0	0	0	0	0	0	0	0	0	0	0	LFW -2	LFW -3	LFW -4	LFW -4	0
38	6695	0	550000000000	0	LFW -3	50000000000	500000000	60000000000	0	0	0	0	2000000	150000000000	0	0	LFW -4	0	LFW -3	15000000000	LFW -3	2500000000000	25000000000	500000000	1500000	100000000	0	0	0	0	0	0	500000	10000000000	30000000000	50000000	0	2000000000	7500000000	LFW -2	LFW -1	3000000000	0	0	5000000000	750000000000	LFW -3	0	2500000000000
39	6739	0	350000000000	0	100000000000	100000000000	2000000000	150000000000	0	0	0	0	2000000	250000000000	0	0	30000000000	0	100000000	20000000000	LFW -2	5000000000000	450000000000	1000000000	5000000	350000000	0	0	0	0	0	0	500000	10000000000	15000000000	500000000	0	1000000000	15000000000	10000000000	2000000	5000000000	0	0	150000000000	300000000000	5000000000	100000000	5000000000000
40	7014	LFW -2	0	0	LFW -3	0	0	0	0	0	0	0	0	0	4000000	LFW -1	0	0	0	0	0	5000000000000	0	0	0	0	2500000000000	1000000000000	10000000000	2500000000	25000000000	LFW-3	0	0	5000000000	1000000	0	0	LFW -2	25000000000	0	LFW -2	0	500000000	2000000000	50000000	50000000	500000000	0
41	8130	0	0	0	5000000000	500000000	500000000	0	0	0	0	0	0	0	15000000000	5000000	0	0	0	250000	0	2000000000	400000000	0	0	400000000	2500000000000	800000000000	LFW -5	LFW -4	LFW -4	LFW -1	0	0	150000000	0	10000000000	0	LFW -1	LFW -1	0	LFW -2	0	0	100000000	300000000	LFW -3	500000000	50000000000
42	8136	0	0	0	0	0	0	0	0	0	0	0	0	0	0	0	0	0	0	0	0	50000000	0	0	0	0	LFW -4	0	100000000000	4000000000	1500000000	0	0	0	LFW -2	0	0	0	0	0	0	0	0	0	0	0	0	0	LFW -2
43	8139	20000000000	200000000	LFW -3	LFW -2	LFW -1	100000000	15000000000	LFW -2	50000000000	150000000000	75000000000	200000000000	2000000000	0	2000000000	10000000000	20000000000	1000000000	3000000000	LFW -3	500000000	2500000	0	0	0	50000000000	5000000000	LFW -2	LFW -1	LFW -2	3000000	0	LFW -1	LFW -2	0	0	0	LFW -1	LFW -1	0	0	LFW -3	0	20000000000	50000000000	100000000	500000000	LFW -4
44	8141	0	50000000	LFW -3	LFW -2	LFW -1	0	20000000	LFW -2	20000000000	50000000000	5000000000	100000000000	1500000000	0	LFW -1	10000000000	25000000000	500000000	1000000000	3000000000	0	0	0	0	0	0	0	0	0	0	0	0	LFW -1	LFW -1	0	0	0	LFW -1	LFW -1	0	0	LFW -2	0
45	8912	0	0	0	LFW -4	LFW -3	LFW -1	LFW -2	0	0	0	0	0	25000000000	0	0	0	0	0	0	0	250000000	LFW -2	0	0	0	LFW -4	LFW -4	LFW -2	LFW -1	LFW -1	LFW -1	0	0	LFW -1	0	LFW -2	0	0	0	0	0	0	0	LFW -5	LFW -5	LFW -4	LFW -4	LFW -2
46	8914	0	0	0	0	LFW -1	0	LFW -1	0	0	0	0	0	LFW -1	0	0	0	0	0	0	0	25000000	0	0	0	0	1500000000	LFW -3	0	0	0	0	0	0	LFW -1	0	0	0	0	0	0	0	0	0	LFW -2	LFW -2	LFW -1	LFW -2	LFW -3
47	8915	0	0	0	0	50000000000	2000000	10000000	0	0	0	0	0	30000000	0	0	0	0	0	0	0	0	450000000000	0	0	0	LFW -3	LFW -3	LFW -4	LFW-3	LFW -4	LFW -1	0	7000000000	0	500000000	0	4000000000	10000000000	20000000000	1500000	1000000000	0	0	0	0	0	0	0
48	9718	5000	300000000000	0	0	300000000	500000000	10000000000	0	0	0	0	1000000	50000000000	10000000	0	0	5000000000	1500000000	50000000000	10000000000	0	0	250000000	150000000	3000000000	LFW -4	LFW -2	0	0	0	0	0	0	0	0	0	0	0	0	0	0	0	250000000000	0	0	0	0	LFW -1
49	9873	0	0	0	0	0	500000	LFW -1	0	0	0	0	0	15000000000	0	0	0	0	0	0	0	LFW -3	LFW -2	0	0	0	0	0	0	0	0	0	0	LFW -1	LFW -1	0	5000000000	0	LFW -2	LFW -2	0	0	0	0	LFW -2	LFW -2	0	LFW -3	LFW -4
50	11278	0	0	0	0	0	0	0	0	0	0	0	0	0	0	0	0	0	0	0	0	0	0	0	0	0	0	0	0	0	0	0	0	0	0	0	0	0	0	0	0	0	0	0	0	0	0	0	0
51	11281	25000000000	250000000000	15000000000	10000000000	50000000000	500000000	50000000000	50000000000	350000000000	750000000000	350000000000	150000000000	450000000000	30000	250000000000	0	350000000000	3000000000	150000000000	20000000000	115000000000	85000000000	3000000000	250000000	100000000	LFW -4	LFW -3	0	0	0	0	20000000000	50000000000	50000000000	1500000000	0	10000000000	55000000000	200000000000	5000000	10000000000	100000000000	0	200000000000	150000000000	LFW -4	100000000000	1000000000000
52	11285	100000000000	200000000	2500000000	5000000000	2000000000	15000000	0	50000000000	200000000000	700000000000	150000000000	50000000000	35000000	0	600000000000	0	50000000000	4000000000	1500000000	30000000000	LFW -3	0	0	0	0	0	LFW -1	15000000	25000000	1000000000	20000000	2000000000	0	LFW -2	0	0	0	LFW -1	90000000	500000	0	30000000000	0	200000000000	50000000000	10000000000	100000000000	LFW -5
53	11286	265000000000	100000000	3000000000	15000000000	2000000000	200000000	0	150000000000	150000000000	300000000000	300000000000	50000000000	40000000	0	3000000000	0	100000000000	0	0	0	LFW -3	LFW -2	0	0	0	2500000000000	1500000000000	0	0	0	0	0	LFW -1	LFW -1	0	1000000	0	LFW -1	40000000	0	0	30000000000	0	LFW -3	LFW -1	LFW -1	LFW -2	LFW -4
54	11536	0	0	0	0	LFW -2	0	LFW -2	0	0	0	0	0	LFW -1	0	0	0	0	0	0	0	LFW -2	LFW -2	0	0	0	300000000000	LFW -4	0	0	0	0	0	0	0	0	10000000000	0	0	0	0	0	0	0	LFW -1	LFW -2	500000000	5000000000	LFW -3
55	11538	2000000000	100000000000	4000000000	50000000000	200000000000	500000000	25000000000	150000000000	250000000000	750000000000	200000000000	100000000000	300000000000	0	300000000000	0	100000000000	1500000000	200000000000	100000000000	110000000000	600000000000	LFW -1	0	0	LFW -4	LFW -4	0	0	0	0	0	35000000000	15000000000	1000000000	0	40000000000	25000000000	50000000000	5000000	15000000000	150000000000	0	50000000000	50000000000	150000000000	250000000000	1000000000000
56	11976	30000000000	300000000	10000000000	20000000000	100000000000	200000000	25000000000	300000000000	500000000000	600000000000	200000000000	100000000000	250000000000	100000	200000000000	0	100000000000	0	LFW -2	0	110000000000	60000000000	0	0	0	LFW -4	LFW -3	0	0	0	0	0	10000000000	20000000000	400000000	5000000000	2500000000	20000000000	100000000	2500000	15000000000	30000000000	0	100000000000	50000000000	15000000	50000000	1000000000000
57	12282	50000000000	LFW -2	0	LFW -2	0	500000000	30000000000	LFW -1	0	0	0	0	0	0	0	0	0	0	LFW -1	0	0	350000000000	0	0	0	250000000000	500000000000	0	0	0	0	0	100000000	0	2000000	0	2000000000	30000000000	40000000000	1500000	3000000000	LFW -1	0	50000000	5000000000	50000000	5000000000	LFW -2
58	12283	2000000	50000	LFW -1	5000000	1500000	500000	0	250000000	600000	10000000	400000	LFW -2	0	0	500000	0	30000000000	3000000000	100000000000	1000000000	500000000000	450000000000	0	0	0	2500000000	50000000000	1000000	0	0	0	0	3000000000	2000000000	2000000000	1500000	15000000000	35000000000	50000000000	5000000	25000000000	10000000000	0	5000000000	100000000000	LFW -2	LFW -2	2500000000000
59	12365	0	0	0	0	0	0	0	0	0	0	0	0	0	0	0	0	0	0	0	0	0	0	0	0	0	1500000000000	0	0	0	0	0	0	0	0	0	0	0	LFW -1	0	0	0	0	0	0	0	0	0	0
60	12368	3000000000	350000000000	LFW -1	10000000000	400000000	50000000	0	100000000000	LFW -2	LFW -2	LFW -2	3000000	20000	0	15000000	0	50000000000	5000000000	50000000000	10000000000	LFW -1	LFW -2	0	0	0	1500000000000	100000000000	0	0	0	0	100000000000	LFW -1	LFW -2	0	0	0	LFW -1	100000000	0	0	50000000000	0	LFW -3	LFW -4	LFW -2	LFW -3	LFW -4
61	12914	250000000	20000000	400000000	200000000	100000000	4000000	0	1500000000	30000000000	100000000000	10000000000	8000000000	3500000	0	20000000000	10000000000	15000000000	0	200000000	7000000000	0	0	0	0	0	0	0	0	0	0	0	0	0	0	0	0	0	0	0	0	0	4000000000	0	LFW -2	LFW -2	LFW -4	LFW -4	0
62	13488	0	0	0	0	0	0	0	0	0	0	0	0	0	0	0	0	0	0	0	0	0	0	0	0	0	LFW -1	0	0	0	0	0	0	0	0	0	0	0	0	0	0	0	0	0	0	0	50000000000	0	0
63	14981	0	LFW -2	0	LFW -2	0	0	0	LFW -1	LFW -1	LFW -1	LFW -1	0	0	0	0	0	0	0	LFW -1	0	1150000000	LFW -2	0	0	0	0	0	0	0	0	0	0	LFW -1	20000000	0	0	0	LFW -1	LFW -1	0	LFW -1	LFW -3	0	LFW -3	50000000	LFW -2	LFW -3	LFW -3
64	15566	20000000000	200000000	1500000000	25000000000	50000000000	700000000	50000000000	50000000000	100000000000	15000000000	25000000000	100000000000	250000000000	0	25000000000	15000000000	200000000000	35000000000	2000000000	15000000000	400000000000	130000000000	0	0	100000000	0	0	0	0	0	0	2000000000	30000000000	50000000000	1000000000	6000000000	500000000	25000000000	5000000000	20000000000	35000000000	15000000000	0	2500000000	50000000000	LFW -4	LFW -4	5000000000000
65	15678	0	0	0	LFW -2	LFW -2	LFW -1	LFW -2	5000000	0	0	0	0	LFW -2	0	0	1000000000	200000	LFW -1	100000000	10000000000	1050000000	65000000000	0	0	0	0	LFW -2	0	0	0	0	0	0	250000000	200000	3000000000	LFW -1	100000000	LFW -2	1500000	LFW -3	0	0	LFW -3	LFW -3	LFW -3	LFW -3	600000000000
66	15753	0	400000000000	0	0	50000000000	400000000	15000000000	0	0	0	0	3000000	350000000000	0	0	0	0	0	150000000000	0	85000000000	5000000000	50000000	1500000	30000000	2500000000000	500000000000	LFW-3	LFW-3	LFW-3	0	0	10000000000	5000000000	100000000	0	200000000	2000000000	3000000000	500000	2000000000	0	0	LFW -5	500000000	LFW -3	LFW -3	150000000000
67	16344	0	0	0	LFW -2	20000000000	20000000000	0	0	0	0	0	0	50000000000	0	0	0	0	0	30000000	0	75000000000	40000000000	0	0	200000000	0	LFW -5	0	0	0	0	0	5000000000	7500000000	150000000	5000000000	300000000	6000000000	3500000000	200000	500000000	0	0	600000000	30000000000	0	0	500000000000
68	16345	45000000000	15000000000	20000000000	20000000000	20000000000	400000000	20000000000	400000000000	200000000000	150000000000	150000000000	50000000000	30000000000	0	25000000000	15000000000	250000000000	5000000000	150000000000	10000000000	450000000000	650000000000	300000000	10000000	200000000	0	2000000000	0	0	0	0	20000000000	30000000000	150000000000	1500000000	70000000	5000000000	100000000000	200000000000	60000000	30000000000	150000000000	0	250000000000	600000000000	15000000000	350000000000	2500000000000
69	16383	2000000000	0	0	500000000	0	0	0	0	0	LFW -1	LFW -1	2000000000	2000000	0	20000000000	0	5000000000	0	0	0	0	0	0	0	0	2500000000000	150000000000	0	0	0	0	0	0	0	0	0	0	0	0	0	0	1500000000	0	50000000000	350000000000	LFW -2	10000000	600000000000
70	16740	LFW -2	LFW -4	5000000000	45000000000	15000000000	100000000	LFW -2	250000000000	300000000000	500000000000	300000000000	30000000000	50000000	0	25000000000	1500000000	3000000	0	10000000	15000000000	LFW -3	LFW -3	50000000	300000	LFW -2	2500000000000	1500000000000	70000000	5000000000	1000000000	50000000	5000000000	LFW -1	LFW -2	0	1500000	0	LFW -1	LFW -1	0	LFW -1	50000000000	0	1500000000	LFW -4	500000000	15000000000	LFW -4
71	16744	10000000	1000000	500000000	1500000000	15000000	3000000	20000000	25000000000	40000000000	150000000000	9000000000	3000000000	4000000000	0	25000000000	10000000000	4000000000	10000000000	LFW -1	10000000000	7000000000	1500000000	0	0	45000000	100000000000	1000000000000	0	100000000	5000000000	150000000	0	LFW -2	500000000	0	5000000000	LFW -1	LFW -4	LFW -4	0	LFW -3	LFW -2	0	10000000000	350000000000	LFW -1	LFW -1	550000000000
72	16847	0	0	0	0	0	0	0	0	0	0	0	0	0	0	0	0	0	0	0	0	0	150000000000	0	0	0	LFW -5	LFW -5	0	0	0	0	0	20000000000	0	500000000	0	15000000000	25000000000	50000000000	500000	10000000000	0	0	0	0	LFW -4	0	0
73	17849	LFW -1	LFW -3	0	LFW -4	LFW -1	0	LFW -2	0	LFW -1	LFW -1	LFW -1	LFW -1	LFW -2	0	LFW -1	LFW -4	LFW -1	LFW -4	LFW -3	LFW -4	80000000000	75000000000	0	0	0	250000000000	800000000000	0	0	0	0	0	20000000000	30000000000	50000000	0	10000000000	5000000000	10000000000	1000000	1500000000	0	0	50000000000	150000000000	20000000000	15000000	1500000000000
74	18560	2500000000	750000000000	5000000000	7000000000	100000000000	2000000000	50000000000	600000000000	5000000000	50000000000	20000000000	5000000000	50000000000	0	LFW -4	10000000000	2500000000	4000000000	250000000000	30000000000	250000000000	700000000000	10000000	0	150000000	750000000000	0	0	LFW -2	LFW -3	0	10000000000	40000000000	300000000000	2500000000	0	10000000000	20000000000	10000000000	3000000	10000000000	LFW -3	0	1500000000	50000000000	LFW -4	0	500000000000
75	18562	0	0	0	LFW -3	1500000000	250000000	2000000000	0	0	0	0	0	5000000000	0	0	0	0	0	0	0	LFW -2	LFW -1	0	0	10000000	300000000000	450000000000	2000000000	50000000000	3500000000	15000000	0	0	LFW -2	0	2000000000	0	LFW -2	0	0	0	0	0	500000000000	500000000000	500000000000	500000000000	500000000000
76	18754	3000000000	600000000000	1000000000	3000000000	15000000000	250000000	10000000000	50000000000	100000000000	200000000000	50000000000	15000000000	250000000000	0	5000000000	30000000000	10000000000	10000000000	300000000000	40000000000	300000000000	150000000000	300000000	15000000	100000000	1250000000000	600000000000	0	0	0	0	50000000000	10000000000	200000000000	0	0	20000000000	50000000000	30000000000	10000000	2000000000	10000000000	0	5000000000	1300000000000	500000000	50000000000	2500000000000
77	18803	0	0	0	0	100000000	100000000	5000000000	0	0	0	0	0	3000000	25000000	0	0	0	0	300000000	0	50000000000	0	150000000	300000	30000000	LFW -2	500000000	0	0	0	0	0	0	30000000000	10000000	0	0	0	0	0	0	0	2000000000	5000000000	150000000000	0	0	1250000000000
78	18855	20000000000	400000000000	3000000000	20000000000	50000000000	500000000	10000000000	100000000000	150000000000	100000000000	300000000000	2000000	300000000000	0	100000000000	1000000000	100000000000	2000000000	400000000000	1000000000	85000000000	200000000000	500000000	2000000	60000000	1500000000000	650000000000	0	0	0	0	2000000000	3000000000	50000000000	100000000	0	5000000000	3000000000	25000000000	2000000	1000000000	15000000000	0	15000000000	650000000000	LFW -2	LFW -3	2000000000000
79	18970	100000000000	600000000000	10000000000	100000000000	50000000000	500000000	30000000000	100000000000	200000000000	300000000000	200000000000	250000000000	200000000000	0	200000000000	5000000000	100000000000	20000000000	100000000000	20000000000	35000000000	155000000000	300000000	10000000	250000000	5000000000	200000000000	0	0	0	0	25000000000	30000000000	150000000000	1000000000	50000	10000000000	50000000000	100000000000	5000000	20000000000	100000000000	0	25000000000	1200000000000	1500000000	500000000	1500000000000
80	19711	20000000000	2000000000	4000000000	25000000000	150000000000	300000000	25000000000	400000000000	350000000000	300000000000	150000000000	100000000000	400000000000	10000000	30000000000	20000000000	200000000000	5000000000	100000000	20000000000	85000000000	250000000000	0	0	40000000	500000000000	150000000000	LFW -2	0	0	0	1000000000	40000000000	30000000000	2500000000	5000000000	0	5000000000	LFW -2	5000000000	LFW -2	100000000000	0	500000000	100000000000	LFW -2	0	2500000000000
81	20176	500000000	LFW -1	1000000000	LFW -1	0	0	0	LFW -2	60000000000	100000000000	50000000000	LFW -1	0	0	LFW -1	3000000000	5000000000	3000000000	10000000	2000000000	0	0	0	0	0	1500000000000	400000000000	LFW -3	LFW -2	LFW -2	0	0	0	0	0	0	0	0	0	0	0	0	0	0	0	LFW -4	LFW -3	0
82	20190	0	0	0	100000000	0	0	0	0	0	0	0	0	0	0	0	0	0	0	0	0	0	0	0	0	0	2500000000000	500000000000	LFW -2	LFW -2	LFW -1	0	LFW (-2)	LFW (-3)	0	0	0	0	0	0	0	0	0	0	0	0	0	0	0
83	23861	0	1000000000000	0	750000000000	LFW -1	15000000	500000000	0	0	0	0	300000	25000000000	0	0	0	0	0	5000000000	0	5000000000	LFW -3	50000000	2000000	40000000	0	0	0	0	0	0	0	0	LFW -3	0	0	0	0	0	0	0	0	0	1500000000	10000000000	5000000000	30000000000	200000000000
84	25623	LFW -1	0	0	LFW -3	LFW -2	0	LFW -2	20000000	LFW -1	LFW -1	LFW -1	LFW -1	LFW -2	3000000	LFW -2	LFW -1	LFW -2	0	0	0	50000000000	5000000000	0	0	0	0	0	0	5000000	250000000	10000000	0	0	0	0	0	0	0	0	0	0	0	0	500000000	50000000000	1000000000000	100000000	500000000000
85	25678	0	0	0	0	0	0	0	0	0	0	0	0	0	0	0	0	0	0	0	0	0	0	0	0	0	5000000000	500000000	15000000000	3500000000	2500000000	10000000	LFW -1	5000000	50000000000	15000000	2500000000	LFW -3	5000000000	5000000000	1500000	LFW -5	LFW -3	0	0	0	0	0	0
86	25762	0	0	0	LFW -1	0	0	0	0	0	0	0	0	0	0	0	0	0	0	0	0	0	0	0	0	0	50000000000	100000000000	0	0	0	0	0	0	0	0	0	0	0	0	0	0	0	0	0	0	0	0	0
87	26263	0	0	0	0	0	0	0	0	0	0	0	0	0	3000000	0	0	0	0	0	0	0	0	0	0	0	0	0	0	0	0	0	0	0	0	0	0	0	0	0	0	0	0	0	0	0	0	0	0
88	29192	15000000	LFW -3	0	LFW -3	50000	15000000	40000000000	LFW -1	0	0	3000000000	10000000000	250000000000	0	1000000000	0	150000000000	0	LFW -1	0	200000000000	75000000000	0	0	0	0	0	0	0	0	0	50000000	300000000000	400000000000	150000000	0	350000000	5000000000	5000000000	1000000	LFW -5	LFW -3	0	2000000000	100000000000	LFW -1	0	1250000000000
89	30858	60000000	2000000000	700000000000	LFW -4	20000000	60000000	LFW -2	600000000000	250000000000	700000000000	250000000000	100000000000	100000000000	0	100000000000	15000000000	150000000000	0	0	0	20000000000	15000000000	0	0	0	0	0	0	0	0	0	0	LFW -1	500000000	3500000	400000	LFW -1	LFW-2	LFW -3	0	LFW -2	200000000000	0	150000000	2000000000	LFW -3	0	5500000000
90	346179	1500000000	750000000000	500000000000	600000000000	750000000000	1500000000	50000000000	750000000000	500000000000	700000000000	100000000000	6000000000	300000000000	0	150000000000	5000000000	100000000000	4000000000	200000000000	5000000000	700000000000	1000000000000	20000000	2000000	200000000	150000000000	550000000000	0	LFW -2	LFW -2	LFW -1	5000000000	40000000000	250000000000	250000000	0	5000000000	50000000000	250000000000	2500000	15000000000	50000000000	0	2500000000	50000000000	LFW -2	0	2500000000000
91	351791	30000000	450000000	25000000000	200000000000	5000000	30000000	0	250000000000	50000000000	250000000000	50000000000	5000000000	1000000	0	50000000000	LFW -2	250000000000	LFW -1	5000000000	LFW -3	200000000000	200000000000	20000	40000	100000	800000000000	500000000000	LFW -2	LFW -2	LFW -2	0	0	2000000000	5000000000	50000000	5000000	500000000	5000000000	45000000000	500000	500000000	50000000000	0	1500000000	20000000000	LFW -3	0	15000000000
92	358800	0	0	0	LFW -1	0	0	0	0	0	0	0	0	0	0	0	0	0	0	LFW -3	LFW -1	600000000000	500000000000	0	0	0	2500000000000	250000000000	LFW -2	LFW -2	LFW -2	0	0	LFW -5	LFW -4	LFW-3	0	LFW -4	LFW -5	LFW -6	LFW -1	LFW -5	0	0	500000000	20000000000	250000000	0	20000000000
93	369569	0	750000000000	0	0	750000000000	1500000000	20000000000	0	0	0	0	1500000	350000000000	0	0	LFW -2	0	0	200000000000	0	LFW -4	LFW -5	25000000	100000	0	20000000000	150000000000	500000000	10000000	200000000	5000000	0	LFW -2	LFW -2	0	0	LFW -1	LFW -2	LFW -2	0	LFW -1	0	0	LFW -3	LFW -4	LFW -1	0	LFW -3
94	373401	0	0	0	0	0	0	0	0	LFW -1	LFW -1	LFW -1	0	LFW -1	0	LFW -1	0	LFW -1	0	LFW -1	0	LFW -2	LFW -2	0	0	0	20000000000	250000000000	LFW -1	LFW -1	LFW -2	0	LFW -1	LFW -1	LFW -1	0	0	0	LFW -2	LFW -2	0	LFW -1	LFW -2	0	0	LFW -1	LFW -2	0	LFW -2
95	390231	200000000	0	0	400000	200000	10000000	0	0	250000000	1000000000	50000000	50000000	0	30000000	500000000	0	100000000	0	0	0	500000000000	0	0	0	0	LFW -5	LFW -4	0	0	0	0	0	0	LFW -1	0	0	0	0	0	0	0	0	0	0	LFW -2	0	0	LFW -3
96	401528	0	0	200000	750000000000	0	0	0	0	0	0	0	0	0	0	0	0	0	0	500000000	0	0	0	0	LFW -1	0	LFW -3	LFW -2	0	0	0	0	0	0	0	0	0	0	0	0	0	0	0	0	150000000000	150000000000	5000000000	25000000	15000
97	409937	200000000000	#NUM!	700000000000	#NUM!	750000000000	1000000000	20000000000	1000000000000	400000000000	600000000000	200000000000	50000000000	250000000000	25000	400000000000	30000000000	100000000000	10000000000	100000000000	15000000000	550000000000	400000	3000000000	10000000	100000000	LFW -3	5000000000	0	100000000	3000000000	20000000	300000000	LFW -2	45000000000	5000000000	LFW -1	LFW -3	5000000000	LFW -5	0	LFW -4	150000000000	0	LFW -4	LFW -5	LFW -5	0	1000000000000
98	435288	0	LFW -3	LFW -3	100000000	LFW -1	0	0	LFW -4	LFW -3	LFW -3	LFW -3	LFW -3	0	3000000	LFW -2	LFW -2	LFW -2	LFW -2	3000000000	0	LFW -4	LFW -2	0	0	0	5000	0	15000000000	500000000	500000000	10000000	LFW -2	0	LFW -3	0	0	0	LFW -1	LFW -2	LFW -1	LFW -1	LFW -2	250000000	0	LFW -4	0	0	LFW -4
99	436311	20000000000	0	0	LFW -3	0	200000000	0	0	0	0	0	0	0	0	0	0	0	0	0	0	40000000000	0	0	0	0	50000000000	15000000000	0	20000000	10000000	5000000	0	0	0	0	0	0	0	0	0	0	0	0	5000000	300000000	LFW -3	0	500000000000
100	443463	25000000000	700000000	750000000000	500000000000	50000000	0	0	750000000000	150000000000	400000000000	150000000000	200000000000	50000000000	0	15000000000	LFW -2	30000000000	LFW -2	10000000000	LFW -2	LFW -5	LFW -4	0	2000000	0	LFW -3	LFW -1	LFW -1	15000000	50000000	1500000	0	0	0	0	0	0	0	0	0	0	0	0	50000000000	200000000000	10000000000	500000	50000000000
	0	No single plaques, no lysis spots, negative result
	1+/LFW	Lysis spots only in lowest dilution, no plaques, lysis from without, negative result
	2+	Tiny clear or small turbid plaques, simetimes difficult to count, slightly positive result
	3+	Large or middle-size clear plaques, positive result
	4+	Very large clear plaques, strictly positive result
[truncated: 22 more columns]
