# Supplementary material for: Correlation of Pseudomonas aeruginosa Phage Resistance with the Numbers and Types of Antiphage Systems
Source: Int J Mol Sci. 2024 Jan 24;25(3):1424. doi: 10.3390/ijms25031424 (PMC10855318; doi:10.3390/ijms25031424)
Supplement: Supplementary file 1 [file ijms-25-01424-s001.zip › Supplementary Table S8 - Efficiency Of Plating.xlsx]

## Sheet: Sup Tab S8 - EOP
Table S8. Phage efficiency of plating.
P.a strains	AFR40 Rel	AFR41 Rel	AFR32 Rel	KEN3 Rel	KEN5 Rel	KEN6 Rel	KEN9 Rel	KEN10 Rel	AF19 Rel	AF20 Rel	AF21 Rel	AF26 Rel	AF28 Rel	AF33 Rel	K7 Rel	K19 Rel	K30 Rel	K49 Rel	K50 Rel	K51 Rel	EPa15 Rel	EP22 Rel	EP16 Rel	EP17 Rel	EP18 rel	E11 Rel	E39 Rel	E4 Rel	E82 Rel	E83 Rel	E87 rel	E95 Rel	E99 rel	E100 rel	E104 Rel	E112 rel	E113 Rel	E114 Rel	E115 Rel	E116 Rel	E118 rel	E125 Rel	Epp15 Rel	E3 Rel	E5 Rel	E6 Rel	E7 rel	E8 Rel	E9 rel
315	0.0754717	0.000266667	0.909091	0.02	0.00666667	0.001	0.05	0.15	0.4	0.4	0.1	0.8	5.55556e-05	0	0.00166667	0	0.571429	0	0.1	0	0.01	0.00025	0	0.0014	6.66667e-05	0.001	0.0333333	0	0	0	0	0	0.00666667	0.0125	0.006	0	0	0	0	0	0	0.2	0	0.04	0.00384615	0	0.04	0.1	0.025
317	0	0	0	0	0	0	0	0	0	0	0	0	0	0	0	0	0	0	0	0	0.01	0	0.0166667	0	0	0	0.0166667	0	0	0	0	0	0	0	0	0	0	0	0	0	0	0	0	0.06	0	0	0	0	0
321	0.188679	0.4	0.909091	0.0106667	0.0666667	0.075	0.2	0.05	0.1	0.2	0.3	0.12	0.333333	0	0.0583333	0.25	0.142857	0.0857143	0.0875	0.5	0.5	0.65	0	0.008	0.0333333	0.5	0.333333	0	0	0	0	1e-05	0.05	0.0625	0.06	0	0.075	0.1	0.08	0.00025	0.285714	0.15	0	0.3	0.115385	0.01	0.3	0.2	0.075
552	0	0	0	0	0.0133333	0.01	0.125	0	0	0	0	0	0	0	0	0.15	0	0.0857143	0.000375	0.25	1	0.0005	0.0833333	0	0	0.2	0.333333	0	0	0	0	0	0	0.1	0.006	0	0	0	0	0	0	0	0	0.5	0.153846	0	0.2	0.2	0.5
994	0.0188679	1.33333e-05	0.0363636	5.33333e-05	3.33333e-05	0.00025	0	0.003	0.04	0.0666667	0.04	0.04	1.11111e-05	0	0.25	0.75	0.00285714	0	0.000125	0.4	1e-05	0	0	0	0	0	0	0	0	0	0	0	0	0	0	0	0	0	0	0	0	0	0	0	0	0	0	0	0
1344	1.88679e-07	1.33333e-07	1	0.2	0.00666667	0.0125	0	0.25	0.8	0.8	0.5	0.2	0.0444444	0	0.0833333	0.25	1.42857e-07	0.0571429	5e-05	0.05	0.25	0	0	0	0.001	0.5	0.366667	0.25	0.1	0.2	0.333333	0.05	0	0.0125	0.0008	0.1	0	0	0	0	0	0.1	0	0.1	0.384615	0.005	3e-05	0.02	0.015
1356	0	0	0.181818	0.00333333	0.000266667	0	0	0.006	0.006	0.266667	0.1	0.1	1.11111e-05	0	0	0	0.0571429	0	0	0	0	0.035	0	0	0	0.1	0	0	0	0	0	4e-07	0.00666667	0	0.007	1e-05	0.0375	0.04	0.02	2.5e-05	0.0428571	0	0	0	0	0	0	0	0
1380	0	0	0	0.0002	2e-08	0	0	0	0	0	0	0	0	1e-05	0	0	0	0	0	0	0	0	0	0	0	0	0	0.005	0.0002	0.1	0.0666667	0	0	0	0	0	0	0	0	0	0	0	0.012	0.0001	0	0	0	0	0
1388	0	0	0	0.0004	0.000266667	0	0	0.0035	0	0	0	0	0	0	0	0	0	0	0	0	0	0	0	0	0	0	0	0	0	0	0	0	0.00333333	0	0.002	0	0.0125	0.015	0.008	2.5e-05	0.0142857	0	0	0	0	0	0	0	0
1583	0	0	0.181818	0	0.0733333	0.015	0.01	0.15	0	0	0	4e-06	0.666667	0	0	0	0	0	0.05	0	5e-05	2.5e-05	0.0666667	0.004	0.05	0.02	0.5	0	0	0	0	3e-06	0.716667	0.0025	0.12	0	0	0	0	0	0	0	0	0.5	0.230769	0	0.4	0	0
1601	0.0377358	0.533333	0.909091	0.0133333	0.00333333	0.0125	0	0.2	0	0.0666667	0.8	0.6	8.88889e-05	0	0.005	1	0.0285714	0.571429	0.075	0.3	0	0.35	0	0	0	0.5	0	1e-05	0	0	0	5e-06	0.0833333	0.075	0.2	0	0.375	0.2	0.02	0.00025	0.571429	0.25	0	0	0	0	0	0	0
1612	0.0943396	0.266667	0.181818	0.02	0.0533333	0.0075	0.02	0.6	0.2	0.533333	0.5	0.6	0.000111111	0	0.0833333	0.225	0.714286	0.114286	0.00375	0.4	0.015	0.001	0	0	0	0.0002	0	0	0	0	0	1.5e-05	0.0166667	0.0625	0.02	0	0	0.1	0	7.5e-05	0	0.025	0	0	0	0	0	0.005	0
1613	0.188679	0.8	0.545455	0.0666667	0.2	0.1	0.25	0.15	0.4	0.666667	0.4	0.2	0.666667	0	0.416667	0.3	0.857143	0.142857	0.375	0.3	0.5	0.1	0	0	0	0.1	0.333333	1e-06	0	0	0	0	0.0166667	0.05	0.01	0	0	0.1	0	2.5e-05	0	0.15	0	0.3	0.115385	0	0.2	0.2	1
1617	0.0754717	0.00533333	2.27273e-05	0.0466667	0.004	0.025	0.00025	0.15	0.3	0.533333	0.4	0.8	0.111111	0	0.25	0.1	0.857143	0	0.00625	0.3	0.01	0.065	0	0	0	0.002	0	0	0	0	0	0.02	0.00233333	0.00125	0.005	0	0	0	0.004	0.1	2.85714e-05	0.0015	0	0	0	0	0	0	0.000125
1688	0.188679	0.000666667	0.909091	0.0266667	0.0133333	0.0075	0	0.25	1	0.933333	1	0.4	0.000111111	0	0.166667	0.3	0.285714	0.0857143	0.000375	0.2	0.0001	0	0	0	0	0.02	0.0333333	0	0	0	0	0	0	0	0	0	0	0	0	0	0	0.2	0	0	0	0	0	0	0
1739	0.0754717	0.000133333	0.181818	0.004	0.00333333	0.015	0	0.05	0.2	0.333333	0.1	0.08	3.33333e-05	0	0.005	0	0.142857	0	0.000125	0	0	0	0	0	0.0133333	0.2	0.5	0	0	0	0	0.02	0	0	0	1	0	0	0	0	0	0.025	0	0	0	0	0	0	0
1899	0.188679	0.466667	0.227273	0.0533333	0.02	0.0075	0.0025	0.25	0.3	0.333333	0.5	0.6	5.55556e-05	0	0.5	0.05	0.714286	0.0428571	0.00025	0.1	0.00018	1.5e-05	0.05	0.0004	0.0333333	0	0	0	0	0	0	0	0.0001	0	0.0004	0	0	0	0	0	0	0.125	0	0.009	0.0115385	0.005	0.07	0.08	0.00075
1902	7.54717e-05	0	0	0.0333333	4e-06	0	0	0	0.01	0.0333333	0	0	0	0	0	0.2	0	0.0114286	3.75e-06	0	0	0	0	0	0	0	0	0	0	0	0	0	0	0	0	5e-05	0	0	0	0	0	0	0	0.05	0.0384615	0.15	0.01	0.0002	0
1906	7.54717e-07	0	0	0.04	4e-06	0	0	0	0	0	0	0	0	0	0	0	2.85714e-05	0.0714286	7.5e-06	0.04	0	0	0	0	0	0.2	0	0.1	0.01	0.02	0.000333333	0.007	0	0	0	0	0	0	0	0	0	0	0	0	0	0	0	0	0
1925	0	0	0	0.0333333	2.66667e-06	0	5e-06	0	0	0	0	0	0	0	0	0	0	0	0.00375	0	0	0.5	0	0	0	0	0	0.35	0	0	0	0	0.0005	0	0.03	0	0	0.005	0.006	7.5e-05	0.00285714	0	0	0.0001	7.69231e-05	5e-07	0.03	0.09	0
1938	0.188679	0.000333333	0.00227273	0.0333333	0.00666667	0.0025	1.5e-06	0.5	0.8	0.666667	0.4	0.6	7.77778e-05	0	0.05	0	0.714286	0	0	0	0	0.0003	0	0	0	0	0	0	0	0	0	0.025	0	0	0	5e-05	0	0	0	0	0	0.15	0	0	0	0	0	0	0
1948	0.000754717	0.266667	0.000227273	0	0.0266667	0.075	0.2	0	0.01	0.2	0.01	0.006	0.444444	0	0	0	2.85714e-07	0	0.00625	0.03	0.0007	0.025	0	0	0.0133333	3e-06	0	0.05	0.0001	0.006	0	0	0.001	0.05	0.004	0	0	0	0	0	0	0.01	0	0	0	0	0.2	0.01	0
3587	0.0188679	0.00133333	0.00545455	0.0266667	0.04	0.015	0.2	0.1	0.4	0.266667	0.5	0.8	0.111111	0	0.416667	0.2	0.285714	0.142857	0.05	0.1	0	0.00025	0.0333333	0.0002	0	0	0	0	0	0	0	0.15	0.0333333	0.0875	0.02	0	0.25	0.05	0.4	0.000125	0.428571	0.5	0	0	0	0	0	0	0
2101	0.0377358	0.000266667	0.0136364	0.0333333	0.00333333	0.0025	0	0.6	0.6	0.933333	1	0.4	8.88889e-05	0	0.5	0.0005	0.857143	0	0.25	0	0.2	0.45	0	0	0	0.002	6.66667e-05	5e-06	0	0	0	0.1	0.0333333	0.025	0.3	0	0.00375	0.01	0.008	0.00015	0.00428571	0.1	0	0	0.0769231	0	0.002	0.4	0.75
2108	1.88679e-06	0	0	0	0	0	0	0	0	0	0	0	2.22222e-06	0	0	0.1	0	0.0285714	3.75e-06	0.03	0.1	0.3	0.0666667	0.0016	0.00333333	0	0	0	0	0	0	0.03	0.0666667	0.025	0.1	0.0005	0.075	0.1	0.12	0.0002	0.285714	0	0	0.08	0.0115385	0.005	0.1	0.3	0.15
2144	0.00943396	5.33333e-07	0	0	0	0	0	0	0	0	0	0	0	0	0.0025	0	0	0	0.00025	0	0	0.25	0	0	0	0.02	0.000666667	5e-05	0	0	0	0	0	0	0	0	0	0	0	5e-05	0	5e-05	0	0.02	0.00769231	0.001	0.03	0.3	0
2444	0	0	0.00454545	0	0.000333333	0	0	0	0.5	0.333333	0.8	1.2e-06	0	0	0	0	0	0	0	0	0	0	0	0	0	0.003	0.133333	0.001	0	0	0	0	0	0	0	0	0	0	0	0	0	0	0	0.1	0.384615	0.0005	0	0	0
3705	0.0754717	0.000666667	0.00454545	0.0266667	0.0533333	0.0125	0.05	0.5	0.4	0.4	0.5	0.4	6.66667e-05	0	0.583333	0.005	0.142857	0	2.5e-05	0.02	0	0.02	0	0	0	0.001	0.00333333	0.01	0.02	0.04	0.1	0	0	0	0	0	0	0.005	0.006	0	0	0.25	0	0.001	0.00230769	0	0	0	0
4841	0.188679	0.000133333	0.00909091	0.533333	0.00333333	0.01	0.075	0.3	0.5	0.666667	0.7	0.4	0.222222	0	0.5	0	0.142857	0	0	0	6e-05	0.05	0	0	0.005	0	0	0	0	0	0	0	0	3.75e-05	0	0.05	0	0	0	2.5e-05	0	0.075	0	0	0	0	0.002	0.2	0
5498	0.113208	0.000133333	0.00272727	0.02	0.00333333	0.0025	0	0.5	0.8	0.933333	0.3	0.32	2.22222e-05	0	0.25	0	0.285714	0	2.5e-05	0	0	0	0	0	0	0	0	0	0	0	0	0	0	0	0	0	0	0	0	0	0	0.15	0	0	0	0	0	0	0
5508	0	1	0	0.0133333	2e-06	0	0	0	0	0	0	1e-05	0	0	0	0	0	0	0	0	0	0.045	0	0	0	0.002	0.00133333	0	0	0	0	1e-05	0.116667	0	0.2	0	0.075	0.15	0.4	5e-05	0.2	0	0	0	0	0	0	0	0
5519	0	0	0	0	0	0	0	0	0	0	0	0	0	0	0	0	0	0	0	0	0.0001	0.0001	0	0	0	0.002	0	0	0	0	0	0	0	0	0	0.035	0	0	0	0	0	0	0	0	0	0	0.01	0.2	0.00075
5524	0	0	0	0	0	0	0	0	0	0	0	0	0	0	0	0	0	0	0	0	0	0	0	0	0	1	0	0.0025	0.0005	0.001	0	0	0	0	0	0	0	0	0	0	0	0	0	0	0	0	0	0	0
5539	0	0	0	0	0	0	0	0	0	0	0	0	0	0	0	0	0	0	0	0	0.0005	2.5e-05	0	0	0	0.0001	0.00333333	0	0	0	0	0	0	0	0	0.075	0	0	0	0	0	0	0	0	0	0	0.02	0.1	0
6220	0	0	0	0	0	0	0	0	0	0	0	0	0	0	0	0	0	0	0.000375	0	0	0	0	0	0	0	0	0	0	0	0	0	0	0	0	0	0	0	0	0	0	0	0	0	0	0	0	0	0
6241	0	0	0	0	0	0	0	0	0	0	0	0	0	0	0	0	0	0	0	0	0	0	0	0	0	0	0.000666667	0	0	0	0	0	0	0	0	0	0	0	0	0	0	0	0	0	0	0	0	0	0
6678	0	0	0	0	0	0	0	0	0	0	0	0	0	0	0	0	0	0	0	0	0	0	0	0	0	0	0	0	0	0	0	0	0	0	0	0	0	0	0	0	0	0	0	0	0	0	0	0	0
6695	0	0.733333	0	0	0.0666667	0.025	0.3	0	0	0	0	8e-06	0.333333	0	0	0	0	0	0.0375	0	0.5	0.025	0.166667	0.006	0.0333333	0	0	0	0	0	0	5e-06	0.0333333	0.075	0.01	0	0.05	0.075	0	0	0.0857143	0	0	0.01	0.576923	0	0	0.5	0.25
6739	0	0.466667	0	0.133333	0.133333	0.1	0.75	0	0	0	0	8e-06	0.555556	0	0	0.15	0	0.00285714	0.05	0	1	0.45	0.333333	0.02	0.116667	0	0	0	0	0	0	5e-06	0.0333333	0.0375	0.1	0	0.025	0.15	0.04	0.0001	0.142857	0	0	0.3	0.230769	0.005	0.0002	1	0.25
7014	0	0	0	0	0	0	0	0	0	0	0	0	0	0.000266667	0	0	0	0	0	0	1	0	0	0	0	0.5	0.666667	0.1	0.05	1	0	0	0	0.0125	0.0002	0	0	0	0.1	0	0	0	0.002	0.004	3.84615e-05	5e-05	0.001	0	0
8130	0	0	0	0.00666667	0.000666667	0.025	0	0	0	0	0	0	0	1	8.33333e-06	0	0	0	6.25e-07	0	0.0004	0.0004	0	0	0.133333	0.5	0.533333	0	0	0	0	0	0	0.000375	0	0.5	0	0	0	0	0	0	0	0.0002	0.000230769	0	0.001	0.01	0.0025
8136	0	0	0	0	0	0	0	0	0	0	0	0	0	0	0	0	0	0	0	0	1e-05	0	0	0	0	0	0	1	0.08	0.06	0	0	0	0	0	0	0	0	0	0	0	0	0	0	0	0	0	0	0
8139	0.0754717	0.000266667	0	0	0	0.005	0.075	0	0.1	0.2	0.15	0.8	0.00444444	0	0.00333333	0.05	0.0571429	0.0285714	0.0075	0	0.0001	2.5e-06	0	0	0	0.01	0.00333333	0	0	0	0.02	0	0	0	0	0	0	0	0	0	0	0	0	0.04	0.0384615	0.0001	0.001	0	0
8141	0	6.66667e-05	0	0	0	0	0.0001	0	0.04	0.0666667	0.01	0.4	0.00333333	0	0	0.05	0.0714286	0.0142857	0.0025	0.03	0	0	0	0	0	0	0	0	0	0	0	0	0	0	0	0	0	0	0	0	0	0	0	0	0	0	0	0	0
8912	0	0	0	0	0	0	0	0	0	0	0	0	0.0555556	0	0	0	0	0	0	0	5e-05	0	0	0	0	0	0	0	0	0	0	0	0	0	0	0	0	0	0	0	0	0	0	0	0	0	0	0	0
8914	0	0	0	0	0	0	0	0	0	0	0	0	0	0	0	0	0	0	0	0	5e-06	0	0	0	0	0.0003	0	0	0	0	0	0	0	0	0	0	0	0	0	0	0	0	0	0	0	0	0	0	0
8915	0	0	0	0	0.0666667	0.0001	5e-05	0	0	0	0	0	6.66667e-05	0	0	0	0	0	0	0	0	0.45	0	0	0	0	0	0	0	0	0	0	0.0233333	0	0.1	0	0.1	0.1	0.08	7.5e-05	0.0285714	0	0	0	0	0	0	0	0
9718	1.88679e-08	0.4	0	0	0.0004	0.025	0.05	0	0	0	0	4e-06	0.111111	0.000666667	0	0	0.0142857	0.0428571	0.125	0.1	0	0	0.0833333	0.6	1	0	0	0	0	0	0	0	0	0	0	0	0	0	0	0	0	0	1	0	0	0	0	0	0
9873	0	0	0	0	0	2.5e-05	0	0	0	0	0	0	0.0333333	0	0	0	0	0	0	0	0	0	0	0	0	0	0	0	0	0	0	0	0	0	0	0.25	0	0	0	0	0	0	0	0	0	0	0	0	0
11278	0	0	0	0	0	0	0	0	0	0	0	0	0	0	0	0	0	0	0	0	0	0	0	0	0	0	0	0	0	0	0	0	0	0	0	0	0	0	0	0	0	0	0	0	0	0	0	0	0
11281	0.0943396	0.333333	0.0136364	0.0133333	0.0666667	0.025	0.25	0.05	0.7	1	0.7	0.6	1	2e-06	0.416667	0	1	0.0857143	0.375	0.2	0.023	0.085	1	1	0.0333333	0	0	0	0	0	0	0.2	0.166667	0.125	0.3	0	0.25	0.55	0.8	0.00025	0.285714	0.5	0	0.4	0.115385	0	0.2	0.2	0.25
11285	0.377358	0.000266667	0.00227273	0.00666667	0.00266667	0.00075	0	0.05	0.4	0.933333	0.3	0.2	7.77778e-05	0	1	0	0.142857	0.114286	0.00375	0.3	0	0	0	0	0	0	0	0.00015	0.0005	0.04	0.133333	0.02	0	0	0	0	0	0	0.00036	2.5e-05	0	0.15	0	0.4	0.0384615	0.01	0.2	0	0
11286	1	0.000133333	0.00272727	0.02	0.00266667	0.01	0	0.15	0.3	0.4	0.6	0.2	8.88889e-05	0	0.005	0	0.285714	0	0	0	0	0	0	0	0	0.5	1	0	0	0	0	0	0	0	0	5e-05	0	0	0.00016	0	0	0.15	0	0	0	0	0	0	0
11536	0	0	0	0	0	0	0	0	0	0	0	0	0	0	0	0	0	0	0	0	0	0	0	0	0	0.06	0	0	0	0	0	0	0	0	0	0.5	0	0	0	0	0	0	0	0	0	0.0005	0.01	0	0
11538	0.00754717	0.133333	0.00363636	0.0666667	0.266667	0.025	0.125	0.15	0.5	1	0.4	0.4	0.666667	0	0.5	0	0.285714	0.0428571	0.5	1	0.022	0.6	0	0	0	0	0	0	0	0	0	0	0.116667	0.0375	0.2	0	1	0.25	0.2	0.00025	0.428571	0.75	0	0.1	0.0384615	0.15	0.5	0.2	0.75
11976	0.113208	0.0004	0.00909091	0.0266667	0.133333	0.01	0.125	0.3	1	0.8	0.4	0.4	0.555556	6.66667e-06	0.333333	0	0.285714	0	0	0	0.022	0.06	0	0	0	0	0	0	0	0	0	0	0.0333333	0.05	0.08	0.25	0.0625	0.2	0.0004	0.000125	0.428571	0.15	0	0.2	0.0384615	1.5e-05	0.0001	0.2	0
12282	0.188679	0	0	0	0	0.025	0.15	0	0	0	0	0	0	0	0	0	0	0	0	0	0	0.35	0	0	0	0.05	0.333333	0	0	0	0	0	0.000333333	0	0.0004	0	0.05	0.3	0.16	7.5e-05	0.0857143	0	0	0.0001	0.00384615	5e-05	0.01	0	0
12283	7.54717e-06	6.66667e-08	0	6.66667e-06	2e-06	2.5e-05	0	0.00025	1.2e-06	1.33333e-05	8e-07	0	0	0	8.33333e-07	0	0.0857143	0.0857143	0.25	0.01	0.1	0.45	0	0	0	0.0005	0.0333333	1e-05	0	0	0	0	0.01	0.005	0.4	7.5e-05	0.375	0.35	0.2	0.00025	0.714286	0.05	0	0.01	0.0769231	0	0	0.5	0.025
12365	0	0	0	0	0	0	0	0	0	0	0	0	0	0	0	0	0	0	0	0	0	0	0	0	0	0.3	0	0	0	0	0	0	0	0	0	0	0	0	0	0	0	0	0	0	0	0	0	0	0
12368	0.0113208	0.466667	0	0.0133333	0.000533333	0.0025	0	0.1	0	0	0	1.2e-05	4.44444e-08	0	2.5e-05	0	0.142857	0.142857	0.125	0.1	0	0	0	0	0	0.3	0.0666667	0	0	0	0	1	0	0	0	0	0	0	0.0004	0	0	0.25	0	0	0	0	0	0	0
12914	0.000943396	2.66667e-05	0.000363636	0.000266667	0.000133333	0.0002	0	0.0015	0.06	0.133333	0.02	0.032	7.77778e-06	0	0.0333333	0.05	0.0428571	0	0.0005	0.07	0	0	0	0	0	0	0	0	0	0	0	0	0	0	0	0	0	0	0	0	0	0.02	0	0	0	0	0	0	0
13488	0	0	0	0	0	0	0	0	0	0	0	0	0	0	0	0	0	0	0	0	0	0	0	0	0	0	0	0	0	0	0	0	0	0	0	0	0	0	0	0	0	0	0	0	0	0.05	0	0	0
14981	0	0	0	0	0	0	0	0	0	0	0	0	0	0	0	0	0	0	0	0	0.00023	0	0	0	0	0	0	0	0	0	0	0	0	5e-05	0	0	0	0	0	0	0	0	0	0	3.84615e-05	0	0	0	0.00025
15566	0.0754717	0.000266667	0.00136364	0.0333333	0.0666667	0.035	0.25	0.05	0.2	0.02	0.05	0.4	0.555556	0	0.0416667	0.075	0.571429	1	0.005	0.15	0.08	0.13	0	0	0.0333333	0	0	0	0	0	0	0.02	0.1	0.125	0.2	0.3	0.0125	0.25	0.02	1	1	0.075	0	0.005	0.0384615	0	0	1	0.25
15678	0	0	0	0	0	0	0	5e-06	0	0	0	0	0	0	0	0.005	5.71429e-07	0	0.00025	0.1	0.00021	0.065	0	0	0	0	0	0	0	0	0	0	0	0.000625	4e-05	0.15	0	0.001	0	7.5e-05	0	0	0	0	0	0	0	0.12	0
15753	0	0.533333	0	0	0.0666667	0.02	0.075	0	0	0	0	1.2e-05	0.777778	0	0	0	0	0	0.375	0	0.017	0.005	0.0166667	0.006	0.01	0.5	0.333333	0	0	0	0	0	0.0333333	0.0125	0.02	0	0.005	0.02	0.012	2.5e-05	0.0571429	0	0	0	0.000384615	0	0	0.03	0.025
16344	0	0	0	0	0.0266667	1	0	0	0	0	0	0	0.111111	0	0	0	0	0	7.5e-05	0	0.015	0.04	0	0	0.0666667	0	0	0	0	0	0	0	0.0166667	0.01875	0.03	0.25	0.0075	0.06	0.014	1e-05	0.0142857	0	0	0.0012	0.0230769	0	0	0.1	0.00125
16345	0.169811	0.02	0.0181818	0.0266667	0.0266667	0.02	0.1	0.4	0.4	0.2	0.3	0.2	0.0666667	0	0.0416667	0.075	0.714286	0.142857	0.375	0.1	0.09	0.65	0.1	0.04	0.0666667	0	0.00133333	0	0	0	0	0.2	0.1	0.375	0.3	0.0035	0.125	1	0.8	0.003	0.857143	0.75	0	0.5	0.461538	0.015	0.7	0.5	0.75
16383	0.00754717	0	0	0.000666667	0	0	0	0	0	0	0	0.008	4.44444e-06	0	0.0333333	0	0.0142857	0	0	0	0	0	0	0	0	0.5	0.1	0	0	0	0	0	0	0	0	0	0	0	0	0	0	0.0075	0	0.1	0.269231	0	2e-05	0.12	0.075
16740	0	0	0.00454545	0.06	0.02	0.005	0	0.25	0.6	0.666667	0.6	0.12	0.000111111	0	0.0416667	0.0075	8.57143e-06	0	2.5e-05	0.15	0	0	0.0166667	0.0012	0	0.5	1	0.0007	0.1	0.04	0.333333	0.05	0	0	0	7.5e-05	0	0	0	0	0	0.25	0	0.003	0	0.0005	0.03	0	0
16744	3.77358e-05	1.33333e-06	0.000454545	0.002	2e-05	0.00015	0.0001	0.025	0.08	0.2	0.018	0.012	0.00888889	0	0.0416667	0.05	0.0114286	0.285714	0	0.1	0.0014	0.0015	0	0	0.015	0.02	0.666667	0	0.002	0.2	1	0	0	0.00125	0	0.25	0	0	0	0	0	0	0	0.02	0.269231	0	0	0.11	0.0005
16847	0	0	0	0	0	0	0	0	0	0	0	0	0	0	0	0	0	0	0	0	0	0.15	0	0	0	0	0	0	0	0	0	0	0.0666667	0	0.1	0	0.375	0.25	0.2	2.5e-05	0.285714	0	0	0	0	0	0	0	0
17849	0	0	0	0	0	0	0	0	0	0	0	0	0	0	0	0	0	0	0	0	0.016	0.075	0	0	0	0.05	0.533333	0	0	0	0	0	0.0666667	0.075	0.01	0	0.25	0.05	0.04	5e-05	0.0428571	0	0	0.1	0.115385	0.02	3e-05	0.3	0.125
18560	0.00943396	1	0.00454545	0.00933333	0.133333	0.1	0.25	0.6	0.01	0.0666667	0.04	0.02	0.111111	0	0	0.05	0.00714286	0.114286	0.625	0.3	0.05	0.7	0.00333333	0	0.05	0.15	0	0	0	0	0	0.1	0.133333	0.75	0.5	0	0.25	0.2	0.04	0.00015	0.285714	0	0	0.003	0.0384615	0	0	0.1	0.025
18562	0	0	0	0	0.002	0.0125	0.01	0	0	0	0	0	0.0111111	0	0	0	0	0	0	0	0	0	0	0	0.00333333	0.06	0.3	0.02	1	0.14	0.1	0	0	0	0	0.1	0	0	0	0	0	0	0	1	0.384615	0.5	1	0.1	0
18754	0.0113208	0.8	0.000909091	0.004	0.02	0.0125	0.05	0.05	0.2	0.266667	0.1	0.06	0.555556	0	0.00833333	0.15	0.0285714	0.285714	0.75	0.4	0.06	0.15	0.1	0.06	0.0333333	0.25	0.4	0	0	0	0	0.5	0.0333333	0.5	0	0	0.5	0.5	0.12	0.0005	0.0571429	0.05	0	0.01	1	0.0005	0.1	0.5	1
18803	0	0	0	0	0.000133333	0.005	0.025	0	0	0	0	0	6.66667e-06	0.00166667	0	0	0	0	0.00075	0	0.01	0	0.05	0.0012	0.01	0	0.000333333	0	0	0	0	0	0	0.075	0.002	0	0	0	0	0	0	0	0.008	0.01	0.115385	0	0	0.25	0
18855	0.0754717	0.533333	0.00272727	0.0266667	0.0666667	0.025	0.05	0.1	0.3	0.133333	0.6	8e-06	0.666667	0	0.166667	0.005	0.285714	0.0571429	1	0.01	0.017	0.2	0.166667	0.008	0.02	0.3	0.433333	0	0	0	0	0.02	0.01	0.125	0.02	0	0.125	0.03	0.1	0.0001	0.0285714	0.075	0	0.03	0.5	0	0	0.4	0.75
18970	0.377358	0.8	0.00909091	0.133333	0.0666667	0.025	0.15	0.1	0.4	0.4	0.4	1	0.444444	0	0.333333	0.025	0.285714	0.571429	0.25	0.2	0.007	0.155	0.1	0.04	0.0833333	0.001	0.133333	0	0	0	0	0.25	0.1	0.375	0.2	2.5e-06	0.25	0.5	0.4	0.00025	0.571429	0.5	0	0.05	0.923077	0.0015	0.001	0.3	0.425
19711	0.0754717	0.00266667	0.00363636	0.0333333	0.2	0.015	0.125	0.4	0.7	0.4	0.3	0.4	0.888889	0.000666667	0.05	0.1	0.571429	0.142857	0.00025	0.2	0.017	0.25	0	0	0.0133333	0.1	0.1	0	0	0	0	0.01	0.133333	0.075	0.5	0.25	0	0.05	0	0.25	0	0.5	0	0.001	0.0769231	0	0	0.5	0.15
20176	0.00188679	0	0.000909091	0	0	0	0	0	0.12	0.133333	0.1	0	0	0	0	0.015	0.0142857	0.0857143	2.5e-05	0.02	0	0	0	0	0	0.3	0.266667	0	0	0	0	0	0	0	0	0	0	0	0	0	0	0	0	0	0	0	0	0	0
20190	0	0	0	0.000133333	0	0	0	0	0	0	0	0	0	0	0	0	0	0	0	0	0	0	0	0	0	0.5	0.333333	0	0	0	0	0	0	0	0	0	0	0	0	0	0	0	0	0	0	0	0	0	0
23861	0	1.33333	0	1	0	0.00075	0.0025	0	0	0	0	1.2e-06	0.0555556	0	0	0	0	0	0.0125	0	0.001	0	0.0166667	0.008	0.0133333	0	0	0	0	0	0	0	0	0	0	0	0	0	0	0	0	0	0	0.003	0.00769231	0.005	0.06	0.04	0.0075
25623	0	0	0	0	0	0	0	2e-05	0	0	0	0	0	0.0002	0	0	0	0	0	0	0.01	0.005	0	0	0	0	0	0	0.0001	0.01	0.0666667	0	0	0	0	0	0	0	0	0	0	0	0	0.001	0.0384615	1	0.0002	0.1	0.175
25678	0	0	0	0	0	0	0	0	0	0	0	0	0	0	0	0	0	0	0	0	0	0	0	0	0	0.001	0.000333333	0.15	0.07	0.1	0.0666667	0	1.66667e-05	0.125	0.003	0.125	0	0.05	0.02	7.5e-05	0	0	0	0	0	0	0	0	0
25762	0	0	0	0	0	0	0	0	0	0	0	0	0	0	0	0	0	0	0	0	0	0	0	0	0	0.01	0.0666667	0	0	0	0	0	0	0	0	0	0	0	0	0	0	0	0	0	0	0	0	0	0
26263	0	0	0	0	0	0	0	0	0	0	0	0	0	0.0002	0	0	0	0	0	0	0	0	0	0	0	0	0	0	0	0	0	0	0	0	0	0	0	0	0	0	0	0	0	0	0	0	0	0	0
29192	5.66038e-05	0	0	0	6.66667e-08	0.00075	0.2	0	0	0	0.006	0.04	0.555556	0	0.00166667	0	0.428571	0	0	0	0.04	0.075	0	0	0	0	0	0	0	0	0	0.0005	1	1	0.03	0	0.00875	0.05	0.02	5e-05	0	0	0	0.004	0.0769231	0	0	0.25	0.25
30858	0.000226415	0.00266667	0.636364	0	2.66667e-05	0.003	0	0.6	0.5	0.933333	0.5	0.4	0.222222	0	0.166667	0.075	0.428571	0	0	0	0.004	0.015	0	0	0	0	0	0	0	0	0	0	0	0.00125	0.0007	2e-05	0	0	0	0	0	1	0	0.0003	0.00153846	0	0	0.0011	0.025
346179	0.00566038	1	0.454545	0.8	1	0.075	0.25	0.75	1	0.933333	0.2	0.024	0.666667	0	0.25	0.025	0.285714	0.114286	0.5	0.05	0.14	1	0.00666667	0.008	0.0666667	0.03	0.366667	0	0	0	0	0.05	0.133333	0.625	0.05	0	0.125	0.5	1	0.000125	0.428571	0.25	0	0.005	0.0384615	0	0	0.5	0.2
351791	0.000113208	0.0006	0.0227273	0.266667	6.66667e-06	0.0015	0	0.25	0.1	0.333333	0.1	0.02	2.22222e-06	0	0.0833333	0	0.714286	0	0.0125	0	0.04	0.2	6.66667e-06	0.00016	3.33333e-05	0.16	0.333333	0	0	0	0	0	0.00666667	0.0125	0.01	0.00025	0.0125	0.05	0.18	2.5e-05	0.0142857	0.25	0	0.003	0.0153846	0	0	0.003	0.025
358800	0	0	0	0	0	0	0	0	0	0	0	0	0	0	0	0	0	0	0	0	0.12	0.5	0	0	0	0.5	0.166667	0	0	0	0	0	0	0	0	0	0	0	0	0	0	0	0	0.001	0.0153846	0.00025	0	0.004	0.025
369569	0	1	0	0	1	0.075	0.1	0	0	0	0	6e-06	0.777778	0	0	0	0	0	0.5	0	0	0	0.00833333	0.0004	0	0.004	0.1	0.005	0.0002	0.008	0.0333333	0	0	0	0	0	0	0	0	0	0	0	0	0	0	0	0	0	0
373401	0	0	0	0	0	0	0	0	0	0	0	0	0	0	0	0	0	0	0	0	0	0	0	0	0	0.004	0.166667	0	0	0	0	0	0	0	0	0	0	0	0	0	0	0	0	0	0	0	0	0	0
390231	0.000754717	0	0	5.33333e-07	2.66667e-07	0.0005	0	0	0.0005	0.00133333	0.0001	0.0002	0	0.002	0.000833333	0	0.000285714	0	0	0	0.1	0	0	0	0	0	0	0	0	0	0	0	0	0	0	0	0	0	0	0	0	0	0	0	0	0	0	0	0
401528	0	0	1.81818e-07	1	0	0	0	0	0	0	0	0	0	0	0	0	0	0	0.00125	0	0	0	0	0	0	0	0	0	0	0	0	0	0	0	0	0	0	0	0	0	0	0	0	0.3	0.115385	0.005	5e-05	3e-09	0
409937	0.754717	0	0.636364	0	1	0.05	0.1	1	0.8	0.8	0.4	0.2	0.555556	1.66667e-06	0.666667	0.15	0.285714	0.285714	0.25	0.15	0.11	4e-07	1	0.04	0.0333333	0	0.00333333	0	0.002	0.12	0.133333	0.003	0	0.1125	1	0	0	0.05	0	0	0	0.75	0	0	0	0	0	0.2	0.025
435288	0	0	0	0.000133333	0	0	0	0	0	0	0	0	0	0.0002	0	0	0	0	0.0075	0	0	0	0	0	0	1e-09	0	0.15	0.01	0.02	0.0666667	0	0	0	0	0	0	0	0	0	0	0	0.001	0	0	0	0	0	0
436311	0.0754717	0	0	0	0	0.01	0	0	0	0	0	0	0	0	0	0	0	0	0	0	0.008	0	0	0	0	0.01	0.01	0	0.0004	0.0004	0.0333333	0	0	0	0	0	0	0	0	0	0	0	0	1e-05	0.000230769	0	0	0.1	0.025
443463	0.0943396	0.000933333	0.681818	0.666667	6.66667e-05	0	0	0.75	0.3	0.533333	0.3	0.8	0.111111	0	0.025	0	0.0857143	0	0.025	0	0	0	0	0.008	0	0	0	0	0.0003	0.002	0.01	0	0	0	0	0	0	0	0	0	0	0	0	0.1	0.153846	0.01	1e-06	0.01	0.1
[truncated: 23 more columns]
