# Supplementary material for: Correlation of Pseudomonas aeruginosa Phage Resistance with the Numbers and Types of Antiphage Systems
Source: Int J Mol Sci. 2024 Jan 24;25(3):1424. doi: 10.3390/ijms25031424 (PMC10855318; doi:10.3390/ijms25031424)
Supplement: Supplementary file 1 [file ijms-25-01424-s001.zip › Supplementary Table S9 - Prevalence in Strains.xlsx]

## Sheet: Sup Tab S9 - Prevalence
Table S9. Prevalence of antiphage systems in P. aeruginosa strains of different phage susceptibility groups.
	System	Susceptibility Group	Number Strains Encoding System	%	50% Breakdown
	PD-T4-6	Most Resistant	10	10.3093	48.4536			No prevalence
		Int Resistant	37	38.1443				Prevalence in phage resistant strains
		Int Susceptible	40	41.2371	51.5464			Prevalence in phage susceptible strains
		Most Susceptible	10	10.3093
	SoFic	Most Resistant	10	11.4943	54.023
		Int Resistant	37	42.5287
		Int Susceptible	32	36.7816	45.977
		Most Susceptible	8	9.1954
	RM Type I	Most Resistant	8	15.3846	61.5385
		Int Resistant	24	46.1538
		Int Susceptible	15	28.8462	38.4615
		Most Susceptible	5	9.61538
	RM Type II	Most Resistant	3	18.75	62.5
		Int Resistant	7	43.75
		Int Susceptible	5	31.25	37.5
		Most Susceptible	1	6.25
	RM Type IIG	Most Resistant	3	16.6667	72.2222
		Int Resistant	10	55.5556
		Int Susceptible	5	27.7778	27.7778
		Most Susceptible	0	0
	RM Type III	Most Resistant	4	25	81.25
		Int Resistant	9	56.25
		Int Susceptible	1	6.25	18.75
		Most Susceptible	2	12.5
	Cbass	Most Resistant	5	11.6279	62.7907
		Int Resistant	22	51.1628
		Int Susceptible	14	32.5581	37.2093
		Most Susceptible	2	4.65116
	CRISPR	Most Resistant	4	9.30233	46.5116
		Int Resistant	16	37.2093
		Int Susceptible	18	41.8605	53.4884
		Most Susceptible	5	11.6279
	HEC	Most Resistant	4	9.7561	56.0976
		Int Resistant	19	46.3415
		Int Susceptible	15	36.5854	43.9024
		Most Susceptible	3	7.31707
	Gabija	Most Resistant	5	12.8205	69.2308
		Int Resistant	22	56.4103
		Int Susceptible	10	25.641	30.7692
		Most Susceptible	2	5.12821
	Lamassu	Most Resistant	2	7.69231	53.8462
		Int Resistant	12	46.1538
		Int Susceptible	12	46.1538	46.1538
		Most Susceptible	0	0
	wadjet	Most Resistant	4	16.6667	79.1667
		Int Resistant	15	62.5
		Int Susceptible	4	16.6667	20.8333
		Most Susceptible	1	4.16667
	DRT	Most Resistant	2	8	44
		Int Resistant	9	36
		Int Susceptible	12	48	56
		Most Susceptible	2	8
	Druantia	Most Resistant	4	18.1818	63.6364
		Int Resistant	10	45.4545
		Int Sucspetible	8	36.3636	36.3636
		Most Susceptible	0	0
	VSPR	Most Resistant	2	9.09091	54.5455
		Int Resistant	10	45.4545
		Int Susceptible	9	40.9091	45.4545
		Most Susceptible	1	4.54545
	AbiE	Most Resistant	4	18.1818	77.2727
		Int Resistant	13	59.0909
		Int Susceptible	4	18.1818	22.7273
		Most Susceptible	1	4.54545
	ietAS	Most Resistant	3	15.7895	73.6842
		Int Resistant	11	57.8947
		Int Susceptible	5	26.3158	26.3158
		Most Susceptible	0	0
	GAO_19	Most Resistant	3	17.6471	64.7059
		Int Resistant	8	47.0588
		Int Susceptible	5	29.4118	35.2941
		Most Susceptible	1	5.88235
	shedu	Most Resistant	3	17.6471	70.5882
		Int Resistant	9	52.9412
		Int Susceptible	5	29.4118	29.4118
		Most Susceptible	0	0
	Argonaute	Most Resistant	2	12.5	56.25
		Int Resistant	7	43.75
		Int Susceptible	5	31.25	43.75
		Most Susceptible	2	12.5
	Mokosh	Most Resistant	2	12.5	56.25
		Int Resistant	7	43.75
		Int Susceptible	6	37.5	43.75
		Most Susceptible	1	6.25
	Zorya	Most Resistant	4	26.6667	86.6667
		Int Resistant	9	60
		Int Susceptible	2	13.3333	13.3333
		Most Susceptible	0	0
	Septu	Most Resistant	0	0	50
		Int Resistant	7	50
		Int Susceptible	6	42.8571	50
		Most Susceptible	1	7.14286
	Brex	Most Resistant	1	7.14286	50
		Int Resistant	6	42.8571
		Int Susceptible	7	50	50
		Most Susceptible	0	0
	RosmerTA	Most Resistant	2	15.3846	69.2308
		Int Resistant	7	53.8462
		Int Susceptible	3	23.0769	30.7692
		Most Susceptible	1	7.69231
	PsyrTA	Most Resistant	2	18.1818	81.8182
		Int Resistant	7	63.6364
		Int Susceptible	2	18.1818	18.1818
		Most Susceptible	0	0
	Retron	Most Resistant	0	0	54.5455
		Int Resistant	6	54.5455
		Int Susceptible	5	45.4545	45.4545
		Most Susceptible	0	0
	PD-Lambda	Most Resistant	0	0	40
		Int Resistant	4	40
		Int Susceptible	5	50	60
		Most Susceptible	1	10
	PDC-S02	Most Resistant	5	12.8205	58.9744
		Int Resistant	18	46.1538
		Int Susceptible	13	33.3333	41.0256
		Most Susceptible	3	7.69231
	PDC-S06	Most Resistant	8	20.5128	74.359
		Int Resistant	21	53.8462
		Int Susceptible	9	23.0769	25.641
		Most Susceptible	1	2.5641
	PDC-M30	Most Resistant	5	15.625	68.75
		Int Resistant	17	53.125
		Int Susceptible	9	28.125	31.25
		Most Susceptible	1	3.125
	PDC-S14	Most Resistant	1	7.14286	42.8571
		Int Resistant	5	35.7143
		Int Susceptible	6	42.8571	57.1429
		Most Susceptible	2	14.2857
	PDC-S09	Most Resistant	2	18.1818	81.8182
		Int Resistant	7	63.6364
		Int Susceptible	2	18.1818	18.1818
		Most Susceptible	0	0
	PDC-S08	Most Resistant	2	20	50
		Int Resistant	3	30
		Int Susceptible	5	50	50
		Most Susceptible	0	0
	PDC-S11	Most Resistant	4	40	90
		Int Resistant	5	50
		Int Susceptible	1	10	10
		Most Susceptible	0	0
