# Supplementary material for: Correlation of Pseudomonas aeruginosa Phage Resistance with the Numbers and Types of Antiphage Systems
Source: Int J Mol Sci. 2024 Jan 24;25(3):1424. doi: 10.3390/ijms25031424 (PMC10855318; doi:10.3390/ijms25031424)
Supplement: Supplementary file 1 [file ijms-25-01424-s001.zip › Supplementary Table S10 - Pycsar effector strains.xlsx]

## Sheet: Supplementary Table S10- Pycsar
Table S10. Host ranges of phages KEN3 and KEN5 and their activity against P. aeruginosa strains encoding predicted pycsar system.
P.a strains	KEN3	KEN5		* = strain encoding predicted pycsar effector
315	15000000000	5000000000
317	LFW -1	0
321	8000000000	50000000000
552	LFW -3	10000000000
994	40000000	25000000
1344	150000000000	5000000000
1356	2500000000	200000000
1380	150000000	15000
*1388	300000000	200000000
1583	LFW -3	55000000000
1601	10000000000	2500000000
1612	15000000000	40000000000
1613	50000000000	150000000000
1617	35000000000	3000000000
1688	20000000000	10000000000
*1739	3000000000	2500000000
1899	40000000000	15000000000
1902	25000000000	3000000
1906	30000000000	3000000
*1925	25000000000	2000000
1938	25000000000	5000000000
1948	0	20000000000
2101	25000000000	2500000000
2108	LFW -2	LFW -3
2144	LFW -2	LFW -1
2444	LFW -3	250000000
3587	20000000000	30000000000
3705	20000000000	40000000000
4841	400000000000	2500000000
5498	15000000000	2500000000
5508	10000000000	1500000
5519	LFW -2	LFW -2
5524	0	0
5539	0	0
6220	0	0
6241	0	0
6678	0	0
6695	LFW -3	50000000000
6739	100000000000	100000000000
7014	LFW -3	0
*8130	5000000000	500000000
8136	0	0
8139	LFW -2	LFW -1
8141	LFW -2	LFW -1
8912	LFW -4	LFW -3
8914	0	LFW -1
*8915	0	50000000000
9718	0	300000000
9873	0	0
11278	0	0
11281	10000000000	50000000000
11285	5000000000	2000000000
11286	15000000000	2000000000
11536	0	LFW -2
11538	50000000000	200000000000
*11976	20000000000	100000000000
12282	LFW -2	0
12283	5000000	1500000
12365	0	0
12368	10000000000	400000000
12914	200000000	100000000
13488	0	0
14981	LFW -2	0
15566	25000000000	50000000000
15678	LFW -2	LFW -2
15753	0	50000000000
16344	LFW -2	20000000000
16345	20000000000	20000000000
16383	500000000	0
*16740	45000000000	15000000000
16744	1500000000	15000000
16847	0	0
17849	LFW -4	LFW -1
18560	7000000000	100000000000
18562	LFW -3	1500000000
18754	3000000000	15000000000
18803	0	100000000
18855	20000000000	50000000000
18970	100000000000	50000000000
19711	25000000000	150000000000
20176	LFW -1	0
20190	100000000	0
23861	750000000000	LFW -1
25623	LFW -3	LFW -2
25678	0	0
25762	LFW -1	0
26263	0	0
29192	LFW -3	50000
30858	LFW -4	20000000
346179	600000000000	750000000000
351791	200000000000	5000000
358800	LFW -1	0
369569	0	750000000000
*373401	0	0
390231	400000	200000
401528	750000000000	0
409937	TMTC	750000000000
435288	100000000	LFW -1
436311	LFW -3	0
443463	500000000000	50000000
0	No single plaques, no lysis spots, negative result
1+/LFW	Lysis spots only in lowest dilution, no plaques, lysis from without, negative result
2+	Tiny clear or small turbid plaques, simetimes difficult to count, slightly positive result
3+	Large or middle-size clear plaques, positive result
4+	Very large clear plaques, strictly positive result
