# Supplementary material for: Correlation of Pseudomonas aeruginosa Phage Resistance with the Numbers and Types of Antiphage Systems
Source: Int J Mol Sci. 2024 Jan 24;25(3):1424. doi: 10.3390/ijms25031424 (PMC10855318; doi:10.3390/ijms25031424)
Supplement: Supplementary file 1 [file ijms-25-01424-s001.zip › Supplementary Table S11 - Shango Antiphage Systems.xlsx]

## Sheet: Supplementary Table S11- Shango
Table S11. Host range of phage EPa11 and its activity against P. aeruginosa strains encoding predicted Shango system.
P.a strains	EPa11		* = strain encoding predicted Shango defense system
315	5000000000
317	LFW -4
321	2500000000000
552	1000000000000
994	LFW -4
1344	2500000000000
1356	500000000000
1380	0
1388	LFW -2
1583	100000000000
1601	2500000000000
1612	1000000000
1613	500000000000
1617	10000000000
*1688	100000000000
*1739	1000000000000
1899	LFW -4
1902	0
1906	1000000000000
1925	LFW -4
1938	LFW -3
*1948	15000000
2101	LFW -5
2108	10000000000
2144	LFW -4
2444	100000000000
3587	15000000000
3705	5000000000
4841	LFW -2
5498	0
5508	10000000000
5519	10000000000
5524	5000000000000
5539	500000000
6220	0
6241	LFW -4
6678	0
6695	0
6739	0
7014	2500000000000
8130	2500000000000
8136	LFW -4
8139	50000000000
8141	0
8912	LFW -4
8914	1500000000
8915	LFW -3
9718	LFW -4
9873	0
11278	0
11281	LFW -4
11285	0
11286	2500000000000
11536	300000000000
11538	LFW -4
11976	LFW -4
12282	250000000000
12283	2500000000
*12365	1500000000000
12368	1500000000000
*12914	0
13488	LFW -1
14981	0
15566	0
15678	0
15753	2500000000000
16344	0
16345	0
16383	2500000000000
16740	2500000000000
16744	100000000000
*16847	LFW -5
17849	250000000000
18560	750000000000
18562	300000000000
18754	1250000000000
18803	LFW -2
18855	1500000000000
18970	5000000000
19711	500000000000
20176	1500000000000
20190	2500000000000
23861	0
25623	0
25678	5000000000
25762	50000000000
26263	0
29192	0
30858	0
346179	150000000000
351791	800000000000
358800	2500000000000
369569	20000000000
*373401	20000000000
390231	LFW -5
401528	LFW -3
409937	LFW -3
435288	5000
436311	50000000000
443463	LFW -3
0	No single plaques, no lysis spots, negative result
1+/LFW	Lysis spots only in lowest dilution, no plaques, lysis from without, negative result
2+	Tiny clear or small turbid plaques, simetimes difficult to count, slightly positive result
3+	Large or middle-size clear plaques, positive result
4+	Very large clear plaques, strictly positive result
